# Supplementary material for: Base-promoted, deborylative secondary alkylation of N-heteroaromatic N-oxides with internal gem-bis[(pinacolato)boryl]alkanes: a facile derivatization of 2,2′-bipyridyl analogues
Source: Royal Society of Chemistry journal article supplement (doi:10.1039/c7cc03731g), 2017-01-01

## ***Supporting Information***

### **Base-promoted, deborylative secondary alkylation of N-heteroaromatic *N*-oxides with internal *gem*-bis[(pinacolato)boryl] alkanes: a facile derivatization of 2,2'-bipyridyl analogues**

Chiwon Hwang, Woohyun Jo, and Seung Hwan Cho

<sup>†</sup>Department of Chemistry, Pohang University of Science and Technology (POSTECH),  
Pohang, 37673, Republic of Korea

#### **Table of Contents**

|                                                                                        |     |
|----------------------------------------------------------------------------------------|-----|
| 1. General experimental details                                                        | S2  |
| 2. General procedure for the preparation of starting materials                         | S3  |
| 3. General procedure for the optimization study                                        | S9  |
| 4. General procedure for the secondary alkylation of N-heteroaromatic <i>N</i> -oxides | S10 |
| 5. General procedure for synthetic applications                                        | S30 |
| 6. Proposed Reaction Mechanism                                                         | S35 |
| 7. References                                                                          | S36 |
| 8. <i>Appendix I</i> Spectral data                                                     | S37 |

## 1. General experimental details

Unless otherwise stated, all air-sensitive manipulations were conducted under an inert atmosphere in a nitrogen-filled glovebox or by standard Schlenk techniques. Anhydrous toluene and 1,4-dioxane were purchased from Aldrich and used as received. Other solvents except toluene and 1,4-dioxane were freshly distilled before used. NaOMe was purchased from Alfa Aesar and used as received. Other reagents were directly used as purchased without further purification. N-Heteroaromatic *N*-oxides were synthesized according to literature procedures.<sup>1,2</sup> 9-*O*-Methylquinine *N*-oxide was synthesized according to a literature procedure.<sup>2</sup> Analytical thin layer chromatography (TLC) was performed on Merck pre-coated silica gel 60 F254 plates. Visualization on TLC was achieved by the use of UV light (254 nm), or treatment with KMnO<sub>4</sub> stain followed by heating. Column chromatography was undertaken on silica gel (400-630 mesh) using a proper eluent system. NMR spectra were acquired on 300 MHz and 500 MHz Bruker instruments at the POSTECH NMR facility. Chemical shifts are reported in ppm relative to a residual solvent peak (CDCl<sub>3</sub> = 7.26 ppm for <sup>1</sup>H and 77.16 ppm for <sup>13</sup>C, CD<sub>2</sub>Cl<sub>2</sub> = 5.32 ppm for <sup>1</sup>H and 54.00 ppm for <sup>13</sup>C). Mass spectral data were obtained from the Korea Basic Science Institute (Daegu) by using EI method.

## 2. General procedure for the preparation of starting materials

### 2.1 General procedure for the preparation of *gem*-bis[(pinacolato)boryl]alkanes

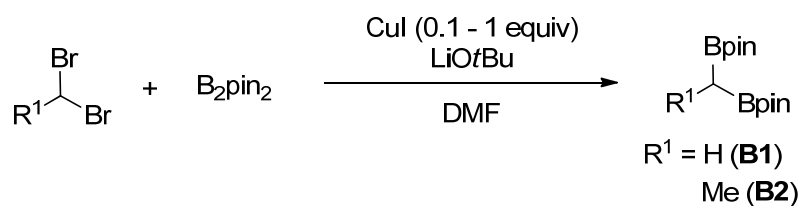

The reaction was performed according to the literature procedure with slight modifications.<sup>3</sup>

**Bis[(pinacolato)boryl]methane (B1):** To an oven-dried 250 mL round-bottomed flask equipped with a Teflon coated magnetic stirbar, copper iodide (1.0 g, 5.5 mmol), LiOtBu (5.2 g, 137.5 mmol) and bis(pinacolato)diboron (25 g, 100 mmol) were added. The flask was evacuated and filled with argon (three cycles). DMF (150 mL) and dibromomethane (9.6 g, 55 mmol) were added via syringe under an argon atmosphere. The reaction mixture was stirred at 40 °C for 24 h, and then diluted with *n*-hexane (150 mL). The organic phase was washed with H<sub>2</sub>O (200 mL) and the aqueous layer was extracted with *n*-hexane (200 mL x 3). The combined organic layers were dried over MgSO<sub>4</sub>, filtered through silica gel and concentrated under reduced pressure. The crude mixture was purified by column chromatography on silica gel to give **B1** (9.4 g, 70 %) as a white solid.

***gem*-Bis[(pinacolato)boryl]ethane (B2):** To an oven-dried 250 mL round-bottomed flask equipped with a Teflon coated magnetic stirbar, copper iodide (4.2 g, 22 mmol), LiOtBu (38 g, 66 mmol) and bis(pinacolato)diboron (10 g, 40 mmol) were added. The flask was evacuated and filled with argon (three cycles). DMF (120 mL) and 1,1-dibromoethane (4.1 g, 22 mmol) were added via syringe under an argon atmosphere. The reaction mixture was stirred at 40 °C for 24 h, and then then diluted with *n*-hexane (150 mL). The organic phase was washed with H<sub>2</sub>O (200 mL) and the aqueous layer was extracted with *n*-hexane (200 mL x 3). The combined organic layers were dried over MgSO<sub>4</sub>, filtered through silica gel and concentrated under

reduced pressure. The crude mixture was purified by column chromatography on silica gel to give **B2** (4.0 g, 71 %) as a colorless liquid.

## 2.2 General procedure for the preparation of internal *gem*-bis[(pinacolato)boryl]alkanes

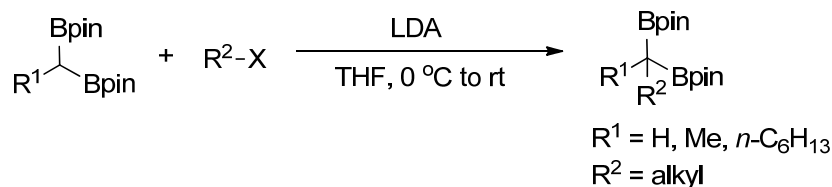

To a 100 mL round bottom flask containing a magnetic stirbar was added *gem*-bis[(pinacolato)boryl]alkane (1.0 equiv) in THF (0.5 M) under nitrogen. To this solution, lithium diisopropylamide (1.0 M in *n*-hexane, 1.1 equiv) was added via syringe at 0 °C. The reaction mixture was stirred for 30 min and then the corresponding alkyl halide (1.1 equiv) was added at 0 °C. The reaction mixture was stirred at 0 °C for 30 min, and allowed to room temperature and stirred for additional 2 h. The reaction mixture was diluted with Et<sub>2</sub>O (20 mL) and quenched with a brine (20 mL). The aqueous layer was extracted with Et<sub>2</sub>O (20 mL x 3) and the combined organic layers were dried over MgSO<sub>4</sub>, filtered and concentrated under reduced pressure. The crude mixture was purified by column chromatography on silica gel.

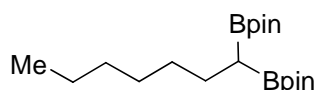

### *gem*-Bis[(pinacolato)boryl]heptane (**B3**)

The reaction was performed according to the general procedure with bis[(pinacolato)boryl]methane **B1** (2.7 g, 10 mmol), lithium diisopropylamide (1.0 M in *n*-hexane, 10 mL, 10 mmol) and 1-bromohexane (1.7 g, 10 mmol) in THF (20 mL). The crude material was purified by column chromatography on silica gel (*n*-hexane:EtOAc, 30:1) to give the product **B3** as a colorless liquid (2.3 g, 67%); <sup>1</sup>H NMR (300 MHz, CDCl<sub>3</sub>) δ 1.56 – 1.48 (q, *J* = 7.2 Hz, 2H), 1.27 – 1.20 (m, 32H), 0.86 – 0.82 (t, *J* = 6.6 Hz, 3H), 0.72 – 0.67 (t, *J* =

7.9 Hz, 1H);  $^{13}\text{C}$  NMR (75 MHz,  $\text{CDCl}_3$ )  $\delta$  83.0, 32.7, 31.9, 29.4, 25.8, 25.0, 24.6, 22.7, 14.2;  $^{11}\text{B}$  NMR (193 MHz,  $\text{CDCl}_3$ )  $\delta$  33.8; The obtained  $^1\text{H}$  and  $^{13}\text{C}$ -NMR were in agreement with the literature.<sup>4</sup>

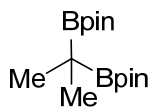

### 2,2-Bis[(pinacolato)boryl]propane (**2a**)

The reaction was performed according to the general procedure with *gem*-bis[(pinacolato)boryl]ethane (**B2**, 2.8 g, 10 mmol), lithium diisopropylamide (1.0 M in *n*-hexane, 11 mL, 11 mmol) and iodomethane (1.6 mg, 11 mmol) in THF (20 mL). The crude material was purified by column chromatography on silica gel (*n*-hexane:EtOAc, 20:1) to give the product **2a** as a white solid (2.5 g, 85%);  $^1\text{H}$  NMR (300 MHz,  $\text{CDCl}_3$ )  $\delta$  1.21 (s, 24H), 1.06 (s, 6H);  $^{13}\text{C}$  NMR (75 MHz,  $\text{CDCl}_3$ )  $\delta$  83.0, 24.8, 20.0;  $^{11}\text{B}$  NMR (193 MHz,  $\text{CDCl}_3$ )  $\delta$  34.40; The obtained  $^1\text{H}$  and  $^{13}\text{C}$ -NMR were in agreement with the literature.<sup>3</sup>

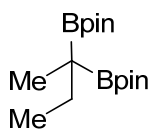

### 2,2-Bis[(pinacolato)boryl]butane (**2b**)

The reaction was performed according to the general procedure with *gem*-bis[(pinacolato)boryl]ethane (**B2**, 3.4 g, 12 mmol), lithium diisopropylamide (1.0 M in *n*-hexane, 14 mL, 14 mmol) and bromoethane (1.6 mg, 14 mmol) in THF (24 mL). The crude material was purified by column chromatography on silica gel (*n*-hexane:EtOAc, 20:1) to give the product **2b** as a white solid (3.1 g, 82%);  $^1\text{H}$  NMR (500 MHz,  $\text{CDCl}_3$ )  $\delta$  1.59 – 1.55 (m, 2H), 1.21 (s, 24H), 1.04 (s, 3H), 0.88 (t,  $J$  = 7.4 Hz, 3H);  $^{13}\text{C}$  NMR (126 MHz,  $\text{CDCl}_3$ )  $\delta$  83.0, 26.8, 24.8, 15.5, 11.8;  $^{11}\text{B}$  NMR (193 MHz,  $\text{CDCl}_3$ )  $\delta$  34.2; HRMS (EI) calc'd for  $\text{C}_{16}\text{H}_{32}^{11}\text{B}_2\text{O}_4$  ( $\text{M}^+$ ) 310.2487, found 310.2487.

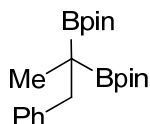

### 2,2-Bis[(pinacolato)boryl]-1-phenylpropane (**2c**)

The reaction was performed according to the general procedure with *gem*-bis[(pinacolato)boryl]ethane (**B2**, 850 mg, 3.0 mmol), lithium diisopropylamide (1.0 M in *n*-hexane, 3.3 mL, 3.3 mmol) and benzyl bromide (560 mg, 3.3 mmol) in THF (6.0 mL). The crude material was purified by column chromatography on silica gel (*n*-hexane:EtOAc, 50:1) to give the product **2c** as a white solid (730 mg, 67%);  $^1\text{H}$  NMR (500 MHz,  $\text{CDCl}_3$ )  $\delta$  7.27 – 7.25 (m, 2H), 7.22 – 7.19 (t,  $J = 7.5$  Hz, 2H), 7.15 – 7.11 (m, 1H), 2.89 (s, 2H), 1.25 (s, 12H), 1.21 (s, 12H), 1.00 (s, 3H);  $^{13}\text{C}$  NMR (126 MHz,  $\text{CDCl}_3$ )  $\delta$  141.9, 130.1, 127.7, 125.6, 83.3, 39.3, 24.8, 16.0;  $^{11}\text{B}$  NMR (193 MHz,  $\text{CDCl}_3$ )  $\delta$  34.0; HRMS (EI) calc'd for  $\text{C}_{21}\text{H}_{34}^{11}\text{B}_2\text{O}_4$  ( $\text{M}^+$ ) 372.2643, found 372.2682.

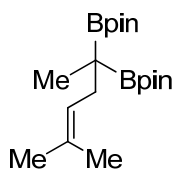

### 2,2-Bis[(pinacolato)boryl]-5-methylhex-4-ene (**2d**)

The reaction was performed according to the general procedure with *gem*-bis[(pinacolato)boryl]ethane (**B2** 1.4 g, 5.0 mmol), lithium diisopropylamide (1.0 M in *n*-hexane, 5.5 mL, 5.5 mmol) and 1-bromo-3-methylbut-2-ene (820 mg, 5.5 mmol) in THF (10 mL). The crude material was purified by column chromatography on silica gel (*n*-hexane:EtOAc, 20:1) to give the product **2e** as a colorless liquid (1.6 g, 92%);  $^1\text{H}$  NMR (500 MHz,  $\text{CDCl}_3$ )  $\delta$  5.14 – 5.10 (m, 1H), 2.22 – 2.20 (d,  $J = 7.5$  Hz, 2H), 1.65 (s, 3H), 1.59 (s, 3H), 1.21 (s, 24H), 1.02 – 1.01 (m, 3H);  $^{13}\text{C}$  NMR (126 MHz,  $\text{CDCl}_3$ )  $\delta$  131.8, 124.1, 83.0, 32.1, 26.1, 24.8, 18.2, 16.1;  $^{11}\text{B}$  NMR (193 MHz,  $\text{CDCl}_3$ )  $\delta$  34.2; HRMS (EI) calc'd for  $\text{C}_{19}\text{H}_{36}^{11}\text{B}_2\text{O}_4$

(M<sup>+</sup>) 350.2800, found 350.2797.

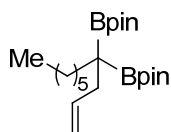

#### 4,4-Bis[(pinacolato)boryl]-dec-1-ene (2e)

The reaction was performed according to the general procedure with *gem*-bis[(pinacolato)boryl]heptane (**B3**, 1.1 g, 3.0 mmol), lithium diisopropylamide (1.0 M in *n*-hexane, 3.3 mL, 3.3 mmol) and allyl bromide (400 mg, 3.3 mmol) in THF (6.0 mL). The crude material was purified by column chromatography on silica gel (*n*-hexane:EtOAc, 30:1) to give the product **2f** as a colorless liquid (1.1 g, 94%); <sup>1</sup>H NMR (500 MHz, CDCl<sub>3</sub>) δ 5.78 – 5.70 (m, 1H), 5.03 – 4.99 (m, 1H), 4.93 – 4.91 (m, 1H), 2.38 – 2.36 (m, 2H), 1.58 – 1.56 (m, 2H), 1.26 – 1.20 (m, 32H), 0.87 – 0.85 (m, 3H); <sup>13</sup>C NMR (126 MHz, CDCl<sub>3</sub>) δ 138.3, 115.4, 83.1, 33.9, 32.0, 30.1, 29.2, 27.1, 24.9, 24.9, 14.2; <sup>11</sup>B NMR (193 MHz, CDCl<sub>3</sub>) δ 33.9; HRMS (EI) calc'd for C<sub>22</sub>H<sub>42</sub><sup>11</sup>B<sub>2</sub>O<sub>4</sub> (M<sup>+</sup>) 392.3269, found 392.3272.

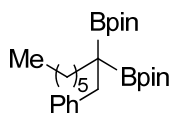

#### 2,2-Bis[(pinacolato)boryl]-1-phenyloctane (2f)

The reaction was performed according to the general procedure with *gem*-bis[(pinacolato)boryl]heptane (**B3**, 860 mg, 2.0 mmol), lithium diisopropylamide (1.0 M in *n*-hexane, 2.2 mL, 2.2 mmol) and benzyl bromide (380 mg, 2.2 mmol) in THF (4.0 mL). The crude material was purified by column chromatography on silica gel (*n*-hexane:EtOAc, 30:1) to give the product **2g** as a white solid (860 mg, 97%); <sup>1</sup>H NMR (500 MHz, CDCl<sub>3</sub>) δ 7.24 – 7.21 (m, 2H), 7.19 – 7.16 (m, 2H), 7.11 – 7.08 (m, 1H), 2.97 (s, 2H), 1.53 – 1.49 (m, 2H), 1.37 – 1.31 (m, 2H), 1.27 – 1.24 (m, 6H), 1.23 (s, 12H), 1.19 (s, 12H), 0.88 – 0.84 (m, 3H); <sup>13</sup>C NMR (126 MHz, CDCl<sub>3</sub>) δ 142.0, 129.8, 127.7, 125.5, 83.2, 34.6, 32.0, 30.0, 28.8, 27.2, 25.1,

24.8, 22.7, 14.1;  $^{11}\text{B}$  NMR (193 MHz,  $\text{CDCl}_3$ )  $\delta$  34.0; HRMS (EI) calc'd for  $\text{C}_{26}\text{H}_{44}^{11}\text{B}_2\text{O}_4$  ( $\text{M}^+$ ) 442.3426, found 442.3428.

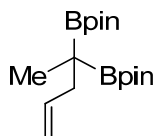

### 2,2-Bis[(pinacolato)boryl]-pent-4-ene (**2e**)

The reaction was performed according to the general procedure with *gem*-bis[(pinacolato)boryl]ethane (**B2**, 850 mg, 3.0 mmol), lithium diisopropylamide (1.0 M in *n*-hexane, 3.3 mL, 3.3 mmol) and allyl bromide (400 mg, 3.3 mmol) in THF (6.0 mL). The crude material was purified by column chromatography on silica gel (*n*-hexane:EtOAc, 20:1) to give the product **2d** as a colorless liquid (820 g, 85%);  $^1\text{H}$  NMR (300 MHz,  $\text{CDCl}_3$ )  $\delta$  5.85 – 5.71 (ddt,  $J$  = 17.2, 10.0, 7.2 Hz, 1H), 5.04 – 4.97 (m, 1H), 4.95 – 4.91 (m, 1H), 2.30 – 2.27 (d,  $J$  = 7.2 Hz, 2H), 1.22 (s, 24H), 1.03 (s, 3H);  $^{13}\text{C}$  NMR (75 MHz,  $\text{CDCl}_3$ )  $\delta$  138.2, 115.7, 83.1, 38.5, 24.9, 24.9, 16.0;  $^{11}\text{B}$  NMR (193 MHz,  $\text{CDCl}_3$ )  $\delta$  34.2; The obtained  $^1\text{H}$  and  $^{13}\text{C}$ -NMR were in agreement with the literature.<sup>3</sup>



### 3. General procedure for the optimization study

To an oven-dried 4-dram vial equipped with a Teflon coated magnetic stirbar were added benzo[*h*]quinolone *N*-oxide (20 mg, 0.10 mmol), **2a** (59 mg, 0.20 mmol), base (0.30 mmol) and anhydrous solvent (1.0 mL). The vial was sealed with a PTFE/silicone-lined septum cap and the reaction mixture was stirred at the indicated temperature for 3 h. The reaction mixture was filtered through celite and washed with CH<sub>2</sub>Cl<sub>2</sub> (60 mL). The filtrate was concentrated under reduced pressure. The <sup>1</sup>H-NMR yield was determined using 1,1,2,2-tetrachloroethane as an internal standard.

**Table S1. Optimization study**

c1ccc2c(c1)c3ccccc3n([O-])[O+]2 (**1a**) + CC(C)(C1OC(C)(C)C1)C2(C)OC(C)(C)C2 (**2a**)  $\xrightarrow[\text{solvent, temp (}^{\circ}\text{C), 3 h}]{\text{base}}$  CC1(C)C2=CC=CC=C2N(C1)C3=CC=CC=C3 (**3a**)

| entry           | base   | solvent     | temp (°C) | <sup>1</sup> H-NMR yield (%) |
|-----------------|--------|-------------|-----------|------------------------------|
| 1               | KOtBu  | toluene     | 120       | 62                           |
| 2               | NaOtBu | toluene     | 120       | 62                           |
| 3               | LiOtBu | toluene     | 120       | 9                            |
| 4               | KOMe   | toluene     | 120       | 7                            |
| 5               | NaOMe  | toluene     | 120       | 97                           |
| 6               | LiOMe  | toluene     | 120       | <1                           |
| 7               | CsF    | toluene     | 120       | <1                           |
| 8               | NaOMe  | THF         | 120       | 93                           |
| 9               | NaOMe  | 1,4-dioxane | 120       | 83                           |
| 10              | NaOMe  | toluene     | 100       | 65                           |
| 11              | NaOMe  | toluene     | 80        | <5                           |
| 12 <sup>a</sup> | NaOMe  | toluene     | 120       | 78                           |
| 13              | -      | toluene     | 120       | <1                           |

<sup>a</sup> 2 equiv. of base were used.

#### 4. General procedure for the secondary alkylation of N-heteroaromatic N-oxides

To an oven-dried 4-dram vial equipped with a Teflon coated magnetic stirbar were added N-heteroaromatic N-oxide (0.20 mmol), NaOMe (3.0 equiv), internal *gem*-bis[(pinacolato)boryl]alkane (2.0 equiv) and anhydrous toluene (2.0 mL). The vial was sealed with a PTFE/silicone-lined septum cap and the reaction mixture was stirred at the indicated temperature for 3 h. The reaction mixture was filtered through celite and washed with CH<sub>2</sub>Cl<sub>2</sub> (20 mL). The filtrate was concentrated under reduced pressure. To remove unreacted internal *gem*-bis[(pinacolato)boryl]alkane, NaBO<sub>3</sub>·4H<sub>2</sub>O (93 mg, 0.60 mmol) and THF/H<sub>2</sub>O (3.0 mL, 1:1) were added to the above obtained crude mixture in a 20 mL vial and stirred for 3 h at room temperature. The reaction mixture was quenched with brine (5.0 mL) and extracted with EtOAc (10 mL x 3). The combined organic layers were dried over MgSO<sub>4</sub>, filtered and concentrated under reduced pressure. The crude reaction mixture was purified by silica gel column chromatography to yield the desired product.

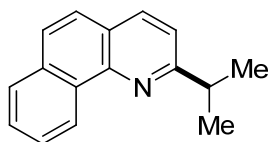

**2-Isopropylbenzo[*h*]quinoline (3a):** The reaction was performed according to the general procedure for the alkylation with benzo[*h*]quinoline-*N*-oxide (39 mg, 0.20 mmol), **2a** (120 mg, 0.40 mmol) and NaOMe (32 mg, 0.60 mmol) in anhydrous toluene (2.0 mL) at 120 °C for 3 h. The crude mixture was purified by column chromatography on silica gel (*n*-hexane:EtOAc, 60:1) to give compound **3a** as an orange oil (42 mg, 95%); <sup>1</sup>H NMR (500 MHz, CDCl<sub>3</sub>) δ 9.54 – 9.52 (dd, *J* = 8.1, 1.3 Hz, 1H), 8.09 – 8.07 (d, *J* = 8.2 Hz, 1H), 7.95 – 7.93 (d, *J* = 7.9 Hz, 1H), 7.82 – 7.76 (m, 2H), 7.75 – 7.71 (m, 1H), 7.68 – 7.66 (d, *J* = 8.8 Hz, 1H), 7.45 – 7.43 (d, *J* = 8.2 Hz, 1H), 3.46 – 3.38 (hept, *J* = 6.9 Hz, 1H), 1.57 – 1.56 (d, *J* = 6.9 Hz, 6H); <sup>13</sup>C NMR

(126 MHz, CDCl<sub>3</sub>)  $\delta$  166.2, 145.8, 136.0, 133.8, 131.8, 127.9, 127.7, 126.7, 126.7, 125.3, 124.7, 124.5, 119.9, 37.1, 22.9; The obtained <sup>1</sup>H and <sup>13</sup>C-NMR were in agreement with the literature.<sup>5</sup>

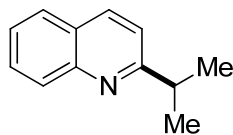

**2-Isopropylquinoline (3b):** The reaction was performed according to the general procedure for the alkylation with quinoline-*N*-oxide (29 mg, 0.20 mmol), **2a** (120 mg, 0.40 mmol) and NaOMe (32 mg, 0.60 mmol) in anhydrous toluene (2.0 mL) at 120 °C for 3 h. The crude mixture was purified by column chromatography on silica gel (*n*-hexane:Et<sub>2</sub>O, 50:1 to 20:1) to give compound **3b** as a light yellow oil (19 mg, 55%); <sup>1</sup>H NMR (500 MHz, CDCl<sub>3</sub>)  $\delta$  8.10 – 8.04 (dd, *J* = 17.8, 8.5 Hz, 2H), 7.79 – 7.76 (m, 1H), 7.69 – 7.66 (ddd, *J* = 8.4, 6.9, 1.4 Hz, 1H), 7.50 – 7.46 (m, 1H), 7.36 – 7.34 (d, *J* = 8.5 Hz, 1H), 3.31 – 3.23 (hept, *J* = 6.9 Hz, 1H), 1.41 – 1.40 (d, *J* = 7.0 Hz, 6H); <sup>13</sup>C NMR (126 MHz, CDCl<sub>3</sub>)  $\delta$  167.8, 147.9, 136.5, 129.4, 129.2, 127.6, 127.1, 125.8, 119.3, 37.5, 22.7; The obtained <sup>1</sup>H and <sup>13</sup>C-NMR were in agreement with the literature.<sup>6</sup>

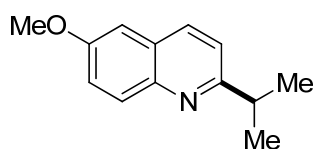

**2-Isopropyl-6-methoxyquinoline (3c):** The reaction was performed according to the general procedure for the alkylation with 6-methoxyquinoline-*N*-oxide (35 mg, 0.20 mmol), **2a** (120 mg, 0.40 mmol) and NaOMe (32 mg, 0.60 mmol) in anhydrous toluene (2.0 mL) at 120 °C for 3 h. The crude mixture was purified by column chromatography on silica gel (*n*-hexane:EtOAc, 10:1) to give compound **3c** as a yellow oil (30 mg, 75%); <sup>1</sup>H NMR (300 MHz, CDCl<sub>3</sub>)  $\delta$  7.96 – 7.93 (d, *J* = 8.8 Hz, 2H), 7.34 – 7.30 (dd, *J* = 9.2, 2.8 Hz, 1H), 7.28 – 7.25 (d, *J* = 8.5 Hz, 1H), 7.01 – 7.00 (d, *J* = 2.8 Hz, 1H), 3.87 (s, 3H), 3.28 – 3.14 (hept, *J* = 7.0 Hz, 1H), 1.38 –

1.36 (d,  $J = 7.0$  Hz, 6H);  $^{13}\text{C}$  NMR (126 MHz,  $\text{CDCl}_3$ )  $\delta$  165.2, 157.2, 143.8, 135.3, 130.4, 127.8, 121.7, 119.4, 105.3, 55.5, 37.1, 22.7; The obtained  $^1\text{H}$  and  $^{13}\text{C}$ -NMR were in agreement with the literature.<sup>7</sup>

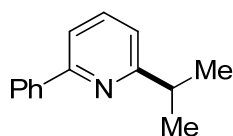

**2-Isopropyl-6-phenylpyridine (3d):** The reaction was performed according to the general procedure for the alkylation with 2-phenylpyridine-*N*-oxide (34 mg, 0.20 mmol), **2a** (120 mg, 0.40 mmol) and NaOMe (32 mg, 0.60 mmol) in anhydrous toluene (2.0 mL) at 120 °C for 3 h. The crude mixture was purified by column chromatography on silica gel (*n*-hexane:EtOAc, 50:1) to give compound **3d** as a colorless oil (34 mg, 86%);  $^1\text{H}$  NMR (500 MHz,  $\text{CDCl}_3$ )  $\delta$  8.08 – 8.05 (m, 2H), 7.68 – 7.65 (t,  $J = 7.7$  Hz, 1H), 7.56 – 7.54 (dd,  $J = 7.8$ , 0.9 Hz, 1H), 7.50 – 7.47 (m, 2H), 7.42 – 7.39 (m, 1H), 7.13 – 7.11 (m, 1H), 3.20 – 3.12 (hept,  $J = 6.9$  Hz, 1H), 1.39 – 1.38 (d,  $J = 6.9$  Hz, 6H);  $^{13}\text{C}$  NMR (126 MHz,  $\text{CDCl}_3$ )  $\delta$  167.2, 156.4, 140.0, 137.0, 128.8, 128.7, 127.1, 119.0, 117.7, 36.6, 22.8; The obtained  $^1\text{H}$  and  $^{13}\text{C}$ -NMR were in agreement with the literature.<sup>8</sup>

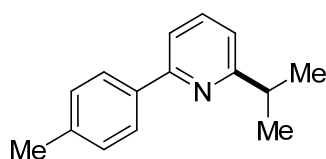

**2-Isopropyl-6-(*p*-tolyl)pyridine (3e):** The reaction was performed according to the general procedure for the alkylation with 2-(*p*-tolyl)pyridine-*N*-oxide (37 mg, 0.20 mmol), **2a** (120 mg, 0.40 mmol) and NaOMe (32 mg, 0.60 mmol) in anhydrous toluene (2.0 mL) at 120 °C for 3 h. The crude mixture was purified by column chromatography on silica gel (*n*-hexane:EtOAc, 50:1) to give compound **3e** as an orange oil (34 mg, 80%);  $^1\text{H}$  NMR (500 MHz,  $\text{CD}_2\text{Cl}_2$ )  $\delta$  7.97 – 7.96 (d,  $J = 8.0$  Hz, 2H), 7.68 – 7.65 (t,  $J = 7.7$  Hz, 1H), 7.55 – 7.54 (d,  $J = 7.8$  Hz, 1H), 7.30

– 7.28 (d,  $J = 7.9$  Hz, 2H), 7.11 – 7.10 (d,  $J = 7.7$  Hz, 1H), 3.16 – 3.08 (hept,  $J = 6.9$  Hz, 1H), 2.42 (s, 3H), 1.37 – 1.36 (d,  $J = 7.0$  Hz, 6H);  $^{13}\text{C}$  NMR (126 MHz,  $\text{CD}_2\text{Cl}_2$ )  $\delta$  167.5, 156.6, 139.3, 137.6, 137.5, 129.8, 127.2, 119.4, 117.7, 37.0, 23.0, 21.5.; The obtained  $^1\text{H}$  and  $^{13}\text{C}$ -NMR were in agreement with the literature.<sup>9</sup>

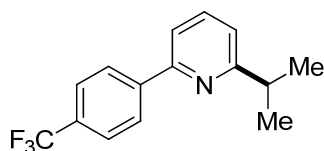

**2-Isopropyl-6-(4-(trifluoromethyl)phenyl)pyridine (3f):** The reaction was performed according to the general procedure for the alkylation with 2-(4-(trifluoromethyl)phenyl)pyridine-*N*-oxide (48 mg, 0.20 mmol), **2a** (120 mg, 0.40 mmol) and NaOMe (32 mg, 0.60 mmol) in anhydrous toluene (2.0 mL) at 120 °C for 3 h. The crude mixture was purified by column chromatography on silica gel (*n*-hexane:EtOAc, 50:1) to give compound **3f** as a light yellow oil (39 mg, 73%);  $^1\text{H}$  NMR (500 MHz,  $\text{CDCl}_3$ )  $\delta$  8.17 – 8.15 (m, 2H), 7.72 – 7.68 (m, 3H), 7.58 – 7.56 (m, 1H), 7.18 – 7.17 (m, 1H), 3.19 – 3.11 (hept,  $J = 6.9$  Hz, 1H), 1.38 – 1.36 (d,  $J = 6.9$  Hz, 6H);  $^{13}\text{C}$  NMR (126 MHz,  $\text{CDCl}_3$ )  $\delta$  167.6, 154.9, 143.4, 137.3, 130.6 (q,  $^2J_{\text{C-F}} = 32.8$  Hz), 127.3, 125.7 (q,  $^3J_{\text{C-F}} = 3.8$  Hz), 124.4 (q,  $^1J_{\text{C-F}} = 272.2$  Hz), 120.1, 118.1, 36.6, 22.8;  $^{19}\text{F}$  NMR (471 MHz,  $\text{CDCl}_3$ )  $\delta$  -62.5; HRMS (EI) calc'd for  $\text{C}_{15}\text{H}_{14}\text{F}_3\text{N}$  ( $\text{M}^+$ ) 265.1078, found 265.1076.

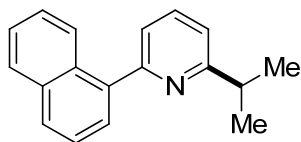

**2-Isopropyl-6-(naphthalen-1-yl)pyridine (3g):** The reaction was performed according to the general procedure for the alkylation with 2-(naphthalen-1-yl)pyridine-*N*-oxide (44 mg, 0.20 mmol), **2a** (120 mg, 0.40 mmol) and NaOMe (32 mg, 0.60 mmol) in anhydrous toluene (2.0 mL) at 120 °C for 3 h. The crude mixture was purified by column chromatography on silica

gel (*n*-hexane:EtOAc, 50:1) to give compound **3g** as a light yellow oil (39 mg, 79%); <sup>1</sup>H NMR (500 MHz, CDCl<sub>3</sub>) δ 8.18 – 8.16 (m, 1H), 7.92 – 7.90 (m, 2H), 7.76 – 7.73 (t, *J* = 7.7 Hz, 1H), 7.64 – 7.62 (dd, *J* = 7.1, 1.3 Hz, 1H), 7.57 – 7.54 (m, 1H), 7.52 – 7.45 (m, 2H), 7.40 – 7.38 (dd, *J* = 7.6, 0.9 Hz, 1H), 7.24 – 7.22 (dd, *J* = 7.9, 0.9 Hz, 1H), 3.26 – 3.17 (hept, *J* = 7.0 Hz, 1H), 1.41 – 1.40 (d, *J* = 6.9 Hz, 6H); <sup>13</sup>C NMR (126 MHz, CDCl<sub>3</sub>) δ 167.3, 158.5, 139.1, 136.8, 134.2, 131.5, 128.8, 128.4, 127.6, 126.3, 126.1, 125.9, 125.5, 122.5, 118.6, 36.7, 22.9; HRMS (EI) calc'd for C<sub>18</sub>H<sub>17</sub>N (M<sup>+</sup>) 247.1361, found 247.1358.

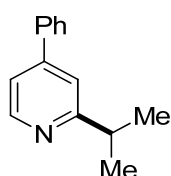

**2-Isopropyl-4-phenylpyridine (3h):** The reaction was performed according to the general procedure for the alkylation with 4-phenylpyridine-*N*-oxide (34 mg, 0.20 mmol), **2a** (120 mg, 0.40 mmol) and NaOMe (32 mg, 0.60 mmol) in anhydrous toluene (2.0 mL) at 120 °C for 3 h. The crude mixture was purified by column chromatography on silica gel (*n*-hexane:EtOAc, 10:1) to give compound **3h** as a light yellow oil (19 mg, 48%); <sup>1</sup>H NMR (500 MHz, CDCl<sub>3</sub>) δ 8.59 – 8.58 (d, *J* = 5.2 Hz, 1H), 7.64 – 7.62 (m, 2H), 7.49 – 7.47 (m, 6.6 Hz, 2H), 7.44 – 7.41 (m, 1H), 7.38 – 7.38 (m, 1H), 7.32 – 7.31 (dd, *J* = 5.2, 1.8 Hz, 1H), 3.18 – 3.09 (hept, *J* = 6.9 Hz, 1H), 1.37 – 1.36 (d, *J* = 6.9 Hz, 6H); <sup>13</sup>C NMR (126 MHz, CDCl<sub>3</sub>) δ 168.0, 149.6, 149.0, 138.9, 129.2, 129.0, 127.2, 119.4, 118.9, 36.6, 22.8; The obtained <sup>1</sup>H and <sup>13</sup>C-NMR were in agreement with the literature.<sup>10</sup>

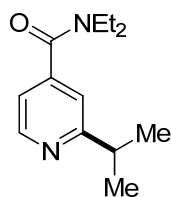

***N,N*-Diethyl-2-isopropylisonicotinamide (3i):** The reaction was performed according to the general procedure for the alkylation with 4-(diethylcarbamoyl)pyridine-*N*-oxide (39 mg, 0.20 mmol), **2a** (120 mg, 0.40 mmol) and NaOMe (32 mg, 0.60 mmol) in anhydrous toluene (2.0 mL) at 120 °C for 3 h. The crude mixture was purified by column chromatography on silica gel (*n*-hexane:Et<sub>2</sub>O, 3:1 to 1:2) to give compound **3i** as a light yellow oil (21 mg, 48%); <sup>1</sup>H NMR (500 MHz, CDCl<sub>3</sub>) δ 8.57 – 8.56 (d, *J* = 4.9 Hz, 1H), 7.13 (s, 1H), 7.06 – 7.04 (dd, *J* = 5.0, 1.4 Hz, 1H), 3.56 – 3.51 (q, *J* = 7.1 Hz, 2H), 3.20 – 3.16 (q, *J* = 7.0 Hz, 2H), 3.12 – 3.03 (hept, *J* = 6.9 Hz, 1H), 1.31 – 1.29 (d, *J* = 6.9 Hz, 6H), 1.26 – 1.23 (t, *J* = 7.1 Hz, 3H), 1.11 – 1.09 (t, *J* = 7.1 Hz, 3H); <sup>13</sup>C NMR (126 MHz, CDCl<sub>3</sub>) δ 169.3, 168.1, 149.5, 145.3, 118.1, 117.8, 43.3, 39.4, 36.5, 22.6, 14.4, 13.0; HRMS (EI) calc'd for C<sub>13</sub>H<sub>20</sub>N<sub>2</sub>O (M<sup>+</sup>) 220.1576, found 220.1579.

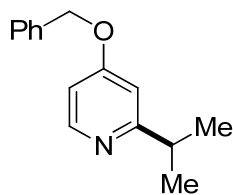

**4-(Benzyloxy)-2-isopropylpyridine (3j):** The reaction was performed according to the general procedure for the alkylation with 4-(benzyloxy)pyridine-*N*-oxide (40 mg, 0.20 mmol), **2a** (120 mg, 0.40 mmol) and NaOMe (32 mg, 0.60 mmol) in anhydrous toluene (2.0 mL) at 120 °C for 3 h. The crude mixture was purified by column chromatography on silica gel (*n*-hexane:EtOAc, 10:1) to give compound **3j** as an orange oil (18 mg, 40%); <sup>1</sup>H NMR (300 MHz, CDCl<sub>3</sub>) δ 8.38 – 8.36 (d, *J* = 5.7 Hz, 1H), 7.44 – 7.33 (m, 5H), 6.77 – 6.77 (d, *J* = 2.4 Hz, 1H), 6.72 – 6.69 (dd, *J* = 5.7, 2.5 Hz, 1H), 5.09 (s, 2H), 3.07 – 2.94 (hept, *J* = 6.9 Hz, 1H), 1.30 – 1.27 (d, *J* = 6.9 Hz, 6H); <sup>13</sup>C NMR (75 MHz, CDCl<sub>3</sub>) δ 169.3, 165.4, 150.5, 136.0, 128.9, 128.5, 127.7, 107.8, 107.5, 69.8, 36.5, 22.6; The obtained <sup>1</sup>H and <sup>13</sup>C-NMR were in agreement with the literature.<sup>11</sup>

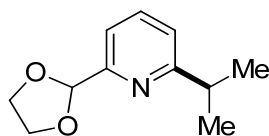

**2-(1,3-Dioxolan-2-yl)-6-isopropylpyridine (3k):** The reaction was performed according to the general procedure for the alkylation with 2-(1,3-dioxolan-2-yl)pyridine-*N*-oxide (33 mg, 0.20 mmol), **2a** (120 mg, 0.40 mmol) and NaOMe (32 mg, 0.60 mmol) in anhydrous toluene (2.0 mL) at 120 °C for 3 h. The crude mixture was purified by column chromatography on silica gel (*n*-hexane:EtOAc, 10:1) to give compound **3k** as a colorless oil (21 mg, 54%); <sup>1</sup>H NMR (500 MHz, CDCl<sub>3</sub>) δ 7.66 – 7.63 (t, *J* = 7.7 Hz, 1H), 7.36 – 7.34 (d, *J* = 7.7 Hz, 1H), 7.17 – 7.16 (d, *J* = 7.8 Hz, 1H), 5.82 (s, 1H), 4.21 – 4.15 (m, 2H), 4.11 – 4.04 (m, 2H), 3.14 – 3.06 (hept, *J* = 7.0 Hz, 1H), 1.30 – 1.29 (d, *J* = 7.0 Hz, 6H); <sup>13</sup>C NMR (126 MHz, CDCl<sub>3</sub>) δ 167.3, 156.2, 137.2, 120.7, 117.7, 104.1, 65.7, 36.5, 22.8; HRMS (EI) calc'd for C<sub>11</sub>H<sub>15</sub>NO<sub>2</sub> (M<sup>+</sup>) 193.1103, found 193.1100.

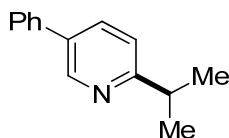

**2-Isopropyl-5-phenylpyridine (3l):** The reaction was performed according to the general procedure for the alkylation with 3-phenylpyridine-*N*-oxide (34 mg, 0.20 mmol), **2a** (120 mg, 0.40 mmol) and NaOMe (32 mg, 0.60 mmol) in anhydrous toluene (2.0 mL) at 120 °C for 3 h. The crude mixture was purified by column chromatography on silica gel (*n*-hexane:EtOAc, 20:1) to give compound **3l** as a light yellow oil (15 mg, 38%); <sup>1</sup>H NMR (500 MHz, CDCl<sub>3</sub>) δ 8.78 – 8.77 (d, *J* = 2.6 Hz, 1H), 7.82 – 7.80 (dd, *J* = 8.1, 2.4 Hz, 1H), 7.58 – 7.56 (m, 2H), 7.48 – 7.45 (m, 2H), 7.40 – 7.36 (m, 1H), 7.26 – 7.24 (d, *J* = 8.3 Hz, 1H), 3.16 – 3.08 (hept, *J* = 6.9 Hz, 1H), 1.36 – 1.35 (d, *J* = 6.9 Hz, 6H); <sup>13</sup>C NMR (126 MHz, CDCl<sub>3</sub>) δ 166.3, 147.6, 138.2,



135.0, 134.1, 129.1, 127.9, 127.1, 120.6, 36.2, 22.8.; HRMS (EI) calc'd for C<sub>14</sub>H<sub>15</sub>N (M<sup>+</sup>) 197.1204, found 197.1202.

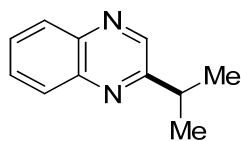

**2-Isopropylquinoxaline (3m):** The reaction was performed according to the general procedure for the alkylation with quinoxaline-*N*-oxide (29 mg, 0.20 mmol), **2a** (120 mg, 0.40 mmol) and NaOMe (32 mg, 0.60 mmol) in anhydrous toluene (2.0 mL) at 120 °C for 3 h. The crude mixture was purified by column chromatography on silica gel (*n*-hexane:EtOAc, 20:1) to give compound **3m** as a light yellow oil (11 mg, 32%); <sup>1</sup>H NMR (500 MHz, CDCl<sub>3</sub>) δ 8.78 (s, 1H), 8.08 – 8.04 (m, 2H), 7.75 – 7.68 (m, 2H), 3.36 – 3.28 (hept, *J* = 7.0 Hz, 1H), 1.45 – 1.44 (d, *J* = 6.9 Hz, 6H); <sup>13</sup>C NMR (126 MHz, CDCl<sub>3</sub>) δ 162.0, 144.9, 142.2, 141.5, 129.9, 129.2, 129.2, 129.0, 35.1, 22.2; The obtained <sup>1</sup>H and <sup>13</sup>C-NMR were in agreement with the literature.<sup>12</sup>

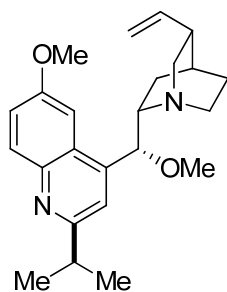

**9-*O*-Methyl-2'-isopropylquinine (3n):** The reaction was performed according to the general procedure for the alkylation with 9-*O*-methylquinine *N*-oxide (35 mg, 0.10 mmol), **2a** (89 mg, 0.30 mmol) and NaOMe (16 mg, 0.30 mmol) in anhydrous toluene (1.0 mL) at 120 °C for 6 h. The crude mixture was purified by column chromatography on silica gel (EtOAc:MeOH, 100:0 to 20:1) to give compound **3n** as a light yellow oil (30 mg, 79%); <sup>1</sup>H NMR (500 MHz, CDCl<sub>3</sub>) δ 7.99 – 7.97 (d, *J* = 9.2 Hz, 1H), 7.37 (s, 1H), 7.34 – 7.32 (dd, *J* = 9.2, 2.6 Hz, 1H), 7.25 – 7.24 (m, 1H), 5.74 – 5.67 (m, 1H), 5.04 (s, 1H), 4.95 – 4.91 (m, 1H), 4.89 – 4.87 (d, *J* = 10.3

Hz, 1H), 3.92 (s, 3H), 3.51 – 3.45 (m, 1H), 3.32 (s, 3H), 3.26 – 3.18 (hept,  $J = 6.8$  Hz, 1H), 3.14 – 3.09 (m, 1H), 3.07 – 3.03 (m, 1H), 2.76 – 2.70 (m, 1H), 2.67 – 2.63 (m, 1H), 2.29 – 2.25 (m, 1H), 1.79 – 1.74 (m, 3H), 1.55 – 1.43 (m, 2H), 1.39 – 1.37 (dd,  $J = 7.0, 2.0$  Hz, 6H);  $^{13}\text{C}$  NMR (126 MHz,  $\text{CDCl}_3$ )  $\delta$  164.9, 157.4, 144.6, 144.3, 142.0, 131.5, 126.1, 121.2, 116.5, 114.4, 101.4, 83.5, 60.1, 57.4, 57.2, 55.9, 43.5, 40.2, 37.2, 28.2, 27.8, 22.8, 22.8, 21.7; HRMS (EI) calc'd for  $\text{C}_{24}\text{H}_{32}\text{N}_2\text{O}_2$  ( $\text{M}^+$ ) 380.2464, found 380.2463.

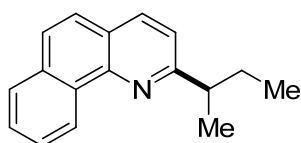

**2-(*sec*-Butyl)benzo[*h*]quinoline (4a):** The reaction was performed according to the general procedure for the alkylation with benzo[*h*]quinoline-*N*-oxide (39 mg, 0.20 mmol), **2b** (124 mg, 0.40 mmol) and NaOMe (32 mg, 0.60 mmol) in anhydrous toluene (2.0 mL) at 120 °C for 3 h. The crude mixture was purified by column chromatography on silica gel (*n*-hexane:EtOAc, 30:1) to give compound **4a** as a yellow oil (45 mg, 96%);  $^1\text{H}$  NMR (500 MHz,  $\text{CDCl}_3$ )  $\delta$  9.43 – 9.41 (m, 1H), 8.08 – 8.07 (d,  $J = 8.1$  Hz, 1H), 7.91 – 7.89 (m, 1H), 7.77 – 7.66 (m, 4H), 7.40 – 7.38 (d,  $J = 8.2$  Hz, 1H), 3.13 – 3.06 (h,  $J = 6.9$  Hz, 1H), 2.05 – 1.96 (m, 1H), 1.84 – 1.76 (m, 1H), 1.47 – 1.46 (d,  $J = 7.0$  Hz, 3H), 0.96 – 0.93 (t,  $J = 7.4$  Hz, 3H);  $^{13}\text{C}$  NMR (126 MHz,  $\text{CDCl}_3$ )  $\delta$  165.6, 146.0, 135.9, 133.8, 131.9, 127.9, 127.7, 126.8, 126.7, 125.4, 124.8, 124.6, 120.8, 44.4, 30.3, 20.7, 12.4; HRMS (EI) calc'd for  $\text{C}_{17}\text{H}_{17}\text{N}$  ( $\text{M}^+$ ) 235.1361, found 235.1361.

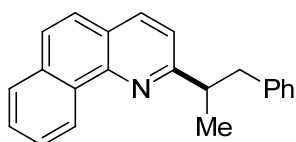

**2-(1-Phenylpropan-2-yl)benzo[*h*]quinoline (4b):** The reaction was performed according to the general procedure for the alkylation with benzo[*h*]quinoline-*N*-oxide (39 mg, 0.20 mmol), **2c** (150 mg, 0.40 mmol) and NaOMe (32 mg, 0.60 mmol) in anhydrous toluene (2.0 mL) at

120 °C for 3 h. The crude mixture was purified by column chromatography on silica gel (*n*-hexane:benzene, 5:1) to give compound **4b** as a light yellow oil (56 mg, 94%); <sup>1</sup>H NMR (500 MHz, CDCl<sub>3</sub>) δ 9.51 – 9.49 (d, *J* = 8.2 Hz, 1H), 8.02 – 8.00 (d, *J* = 8.1 Hz, 1H), 7.93 – 7.91 (m, 1H), 7.79 – 7.76 (m, 2H), 7.73 – 7.69 (m, 1H), 7.66 – 7.64 (d, *J* = 8.8 Hz, 1H), 7.28 – 7.16 (m, 6H), 3.51 – 3.46 (m, 1H), 3.45 – 3.40 (m, 1H), 3.08 – 3.04 (dd, *J* = 13.1, 7.4 Hz, 1H), 1.50 – 1.49 (d, *J* = 6.7 Hz, 3H); <sup>13</sup>C NMR (126 MHz, CDCl<sub>3</sub>) δ 164.6, 146.0, 141.2, 135.9, 133.8, 131.8, 129.4, 128.2, 128.0, 127.8, 126.8, 126.8, 125.9, 125.4, 124.8, 124.7, 121.1, 44.6, 43.5, 20.7; HRMS (EI) calc'd for C<sub>22</sub>H<sub>19</sub>N (M<sup>+</sup>) 297.1517, found 297.1515.

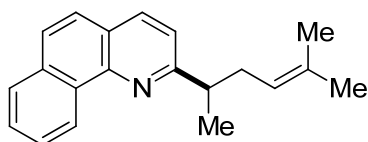

**2-(5-Methylhex-4-en-2-yl)benzo[*h*]quinoline (4c):** The reaction was performed according to the general procedure for the alkylation with benzo[*h*]quinoline-*N*-oxide (39 mg, 0.20 mmol), **2d** (140 mg, 0.40 mmol) and NaOMe (32 mg, 0.60 mmol) in anhydrous toluene (2.0 mL) at 120 °C for 3 h. The crude mixture was purified by column chromatography on silica gel (*n*-hexane:benzene, 5:1) to give compound **4c** as a colorless oil (50 mg, 91%); <sup>1</sup>H NMR (500 MHz, CDCl<sub>3</sub>) δ 9.46 – 9.44 (m, 1H), 8.08 – 8.06 (d, *J* = 8.1 Hz, 1H), 7.92 – 7.90 (m, 1H), 7.77 – 7.73 (m, 2H), 7.71 – 7.66 (m, 2H), 7.40 – 7.39 (d, *J* = 8.2 Hz, 1H), 5.25 – 5.21 (m, 1H), 3.25 – 3.18 (h, *J* = 7.0 Hz, 1H), 2.71 – 2.65 (m, 1H), 2.52 – 2.47 (m, 1H), 1.68 (s, 3H), 1.61 (s, 3H), 1.50 – 1.48 (d, *J* = 6.9 Hz, 3H); <sup>13</sup>C NMR (126 MHz, CDCl<sub>3</sub>) δ 165.3, 146.0, 135.8, 133.8, 132.7, 131.9, 127.9, 127.7, 126.8, 126.7, 125.4, 124.8, 124.6, 123.1, 120.8, 43.2, 35.9, 25.9, 20.5, 18.0; HRMS (EI) calc'd for C<sub>20</sub>H<sub>21</sub>N (M<sup>+</sup>) 275.1674, found 275.1672.

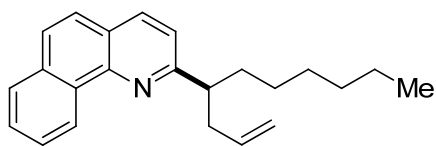

**2-(Dec-1-en-4-yl)benzo[*h*]quinoline (4d):** The reaction was performed according to the general procedure for the alkylation with benzo[*h*]quinoline-*N*-oxide (39 mg, 0.20 mmol), **2e** (157 mg, 0.40 mmol) and NaOMe (32 mg, 0.60 mmol) in anhydrous toluene (2.0 mL) at 120 °C for 3 h. The crude mixture was purified by column chromatography on silica gel (*n*-hexane:benzene, 20:1) to give compound **4d** as a colorless oil (45 mg, 71%); <sup>1</sup>H NMR (500 MHz, CDCl<sub>3</sub>) δ 9.44 – 9.42 (d, *J* = 8.1 Hz, 1H), 8.08 – 8.06 (d, *J* = 8.2 Hz, 1H), 7.92 – 7.90 (d, *J* = 7.7 Hz, 1H), 7.77 – 7.66 (m, 4H), 7.36 – 7.34 (d, *J* = 8.1 Hz, 1H), 5.85 – 5.77 (ddt, *J* = 17.2, 10.2, 7.0 Hz, 1H), 5.05 – 5.01 (m, 1H), 4.94 – 4.92 (m, 1H), 3.15 – 3.09 (tt, 8.6, 5.7 Hz, 1H), 2.80 – 2.74 (m, 1H), 2.61 – 2.56 (m, 1H), 2.00 – 1.96 (m, 1H), 1.86 – 1.83 (m, 1H), 1.37 – 1.16 (m, 8H), 0.87 – 0.84 (t, *J* = 6.9 Hz, 3H); <sup>13</sup>C NMR (126 MHz, CDCl<sub>3</sub>) δ 163.9, 146.1, 137.5, 135.6, 133.8, 131.9, 127.9, 127.7, 126.8, 126.7, 125.4, 124.9, 124.6, 121.8, 115.9, 48.4, 40.3, 35.5, 31.9, 29.6, 27.6, 22.8, 14.2; HRMS (EI) calc'd for C<sub>23</sub>H<sub>27</sub>N (M<sup>+</sup>) 317.2143, found 317.2141.

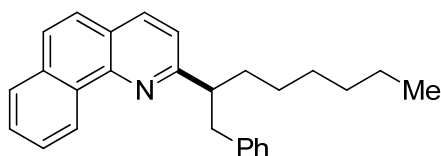

**2-(1-Phenyloctan-2-yl)benzo[*h*]quinoline (4e):** The reaction was performed according to the general procedure for the alkylation with benzo[*h*]quinoline-*N*-oxide (39 mg, 0.20 mmol), **2f** (180 mg, 0.40 mmol) and NaOMe (32 mg, 0.60 mmol) in anhydrous toluene (2.0 mL) at 120 °C for 3 h. The crude mixture was purified by column chromatography on silica gel (*n*-hexane:benzene, 10:1) to give compound **4e** as a colorless oil (63 mg, 86%); <sup>1</sup>H NMR (500 MHz, CDCl<sub>3</sub>) δ 9.53 – 9.51 (d, *J* = 8.1 Hz, 1H), 8.00 – 7.98 (d, *J* = 8.1 Hz, 1H), 7.95 – 7.93 (d, *J* = 7.8 Hz, 1H), 7.81 – 7.77 (m, 2H), 7.75 – 7.71 (m, 1H), 7.67 – 7.66 (d, *J* = 8.8 Hz, 1H), 7.21 – 7.19 (m, 3H), 7.15 – 7.13 (m, 3H), 3.42 – 3.37 (m, 1H), 3.36 – 3.30 (m, 1H), 3.17 – 3.13 (dd,

$J = 12.9, 5.9$  Hz, 1H), 2.14 – 2.07 (m, 1H), 1.91 – 1.84 (m, 1H), 1.36 – 1.20 (m, 8H), 0.88 – 0.85 (t,  $J = 7.0$  Hz, 3H);  $^{13}\text{C}$  NMR (126 MHz,  $\text{CDCl}_3$ )  $\delta$  163.6, 146.2, 141.3, 135.5, 133.8, 131.9, 129.3, 128.1, 128.0, 127.7, 126.8, 126.7, 125.8, 125.5, 124.9, 124.6, 122.3, 50.6, 42.4, 35.5, 31.9, 29.6, 27.7, 22.8, 14.2; HRMS (EI) calc'd for  $\text{C}_{27}\text{H}_{29}\text{N}$  ( $\text{M}^+$ ) 367.2300, found 367.2300.

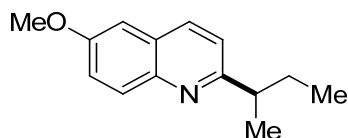

**2-(*sec*-Butyl)-6-methoxyquinoline (4f):** The reaction was performed according to the general procedure for the alkylation with 6-methoxyquinoline-*N*-oxide (35 mg, 0.20 mmol), **2b** (124 mg, 0.40 mmol) and NaOMe (32 mg, 0.60 mmol) in anhydrous toluene (2.0 mL) at 120 °C for 3 h. The crude mixture was purified by column chromatography on silica gel (*n*-hexane:EtOAc, 20:1) to give compound **4f** as a yellow oil (36 mg, 84%);  $^1\text{H}$  NMR (500 MHz,  $\text{CDCl}_3$ )  $\delta$  7.97 – 7.94 (t,  $J = 8.5$  Hz, 2H), 7.34 – 7.32 (dd,  $J = 9.2, 2.8$  Hz, 1H), 7.25 – 7.24 (d,  $J = 8.5$  Hz, 1H), 7.04 – 7.03 (d,  $J = 2.8$  Hz, 1H), 3.90 (s, 3H), 3.00 – 2.93 (h,  $J = 7.1$  Hz, 1H), 1.87 – 1.79 (m, 1H), 1.74 – 1.65 (m, 1H), 1.36 – 1.34 (d,  $J = 7.0$  Hz, 3H), 0.90 – 0.87 (t,  $J = 7.4$  Hz, 3H);  $^{13}\text{C}$  NMR (126 MHz,  $\text{CDCl}_3$ )  $\delta$  164.6, 157.3, 144.0, 135.2, 130.6, 127.9, 121.7, 119.9, 105.3, 55.6, 44.5, 30.2, 20.6, 12.4; HRMS (EI) calc'd for  $\text{C}_{14}\text{H}_{17}\text{NO}$  ( $\text{M}^+$ ) 215.1310, found 215.1312.

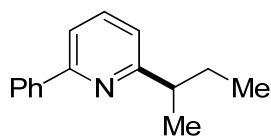

**2-(*sec*-Butyl)-6-phenylpyridine (4g):** The reaction was performed according to the general procedure for the alkylation with 2-phenylpyridine-*N*-oxide (34 mg, 0.20 mmol), **2b** (120 mg, 0.40 mmol) and NaOMe (32 mg, 0.60 mmol) in anhydrous toluene (2.0 mL) at 120 °C for 3 h. The crude mixture was purified by column chromatography on silica gel (*n*-hexane:benzene,

3:1) to give compound **4g** as a yellow oil (37 mg, 88%);  $^1\text{H}$  NMR (500 MHz,  $\text{CDCl}_3$ )  $\delta$  8.08 – 8.06 (m, 2H), 7.68 – 7.64 (t,  $J = 7.7$  Hz, 1H), 7.56 – 7.54 (d,  $J = 7.7$  Hz, 1H), 7.50 – 7.47 (m, 2H), 7.43 – 7.39 (m, 1H), 7.09 – 7.07 (d,  $J = 7.6$  Hz, 1H), 2.93 – 2.86 (h,  $J = 7.0$  Hz, 1H), 1.92 – 1.84 (m, 1H), 1.74 – 1.65 (m, 1H), 1.37 – 1.35 (d,  $J = 7.0$  Hz, 3H), 0.93 – 0.90 (t,  $J = 7.4$  Hz, 3H);  $^{13}\text{C}$  NMR (126 MHz,  $\text{CDCl}_3$ )  $\delta$  166.4, 156.5, 140.1, 136.8, 128.7, 127.1, 112.0, 117.7, 43.9, 30.1, 20.6, 12.3; HRMS (EI) calc'd for  $\text{C}_{15}\text{H}_{17}\text{N}$  ( $\text{M}^+$ ) 211.1361, found 211.1359.

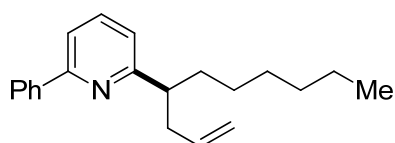

**2-(Dec-1-en-4-yl)-6-phenylpyridine (4h):** The reaction was performed according to the general procedure for the alkylation with 2-phenylpyridine-*N*-oxide (34 mg, 0.20 mmol), **2e** (160 mg, 0.40 mmol) and NaOMe (32 mg, 0.60 mmol) in anhydrous toluene (2.0 mL) at 120 °C for 3 h. The crude mixture was purified by column chromatography on silica gel (*n*-hexane:EtOAc, 50:1) to give compound **4h** as a light yellow oil (50 mg, 85%);  $^1\text{H}$  NMR (500 MHz,  $\text{CDCl}_3$ )  $\delta$  8.08 – 8.05 (m, 2H), 7.65 – 7.62 (t,  $J = 7.7$  Hz, 1H), 7.55 – 7.54 (d,  $J = 7.8$  Hz, 1H), 7.49 – 7.46 (t,  $J = 7.6$  Hz, 2H), 7.42 – 7.39 (m, 1H), 7.03 – 7.01 (d,  $J = 7.6$  Hz, 1H), 5.79 – 5.71 (ddt,  $J = 17.1, 10.1, 7.0$  Hz, 1H), 5.01 – 4.97 (dd,  $J = 17.1, 2.0$  Hz, 1H), 4.93 – 4.91 (dd,  $J = 10.2, 2.1$  Hz, 1H), 2.91 – 2.85 (tt,  $J = 8.6, 5.8$  Hz, 1H), 2.64 – 2.58 (m, 1H), 2.49 – 2.43 (m, 1H), 1.86 – 1.78 (m, 1H), 1.75 – 1.69 (m, 1H), 1.38 – 1.12 (m, 8H), 0.87 – 0.84 (t,  $J = 6.9$  Hz, 3H).  $^{13}\text{C}$  NMR (126 MHz,  $\text{CDCl}_3$ )  $\delta$  164.6, 156.6, 140.1, 137.5, 136.6, 128.8, 128.7, 127.0, 121.2, 117.8, 115.8, 47.9, 40.1, 35.1, 31.9, 29.6, 27.6, 22.8, 14.2; HRMS (EI) calc'd for  $\text{C}_{21}\text{H}_{27}\text{N}$  ( $\text{M}^+$ ) 293.2143, found 293.2141.

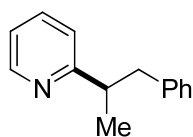

**2-(1-Phenylpropan-2-yl)pyridine (4i):** The reaction was performed according to the general procedure for the alkylation with pyridine-*N*-oxide (19 mg, 0.20 mmol), **2c** (150 mg, 0.40 mmol) and NaOMe (32 mg, 0.60 mmol) in anhydrous toluene (2.0 mL) at 120 °C for 3 h. The crude mixture was purified by column chromatography on silica gel (*n*-hexane:EtOAc, 20:1) to give compound **4i** as a light yellow oil (22 mg, 56%); <sup>1</sup>H NMR (500 MHz, CDCl<sub>3</sub>) δ 8.59 – 8.57 (m, 1H), 7.55 – 7.52 (td, *J* = 7.7, 1.9 Hz, 1H), 7.24 – 7.20 (m, 2H), 7.17 – 7.13 (m, 1H), 7.10 – 7.08 (m, 3H), 7.03 – 7.01 (m, 1H), 3.22 – 3.15 (h, *J* = 6.9 Hz, 1H), 3.13 – 3.09 (m, 1H), 2.87 – 2.82 (dd, *J* = 13.2, 7.9 Hz, 1H), 1.30 – 1.29 (d, *J* = 6.8 Hz, 3H); <sup>13</sup>C NMR (126 MHz, CDCl<sub>3</sub>) δ 165.7, 149.4, 140.8, 136.3, 129.3, 128.2, 126.0, 122.1, 121.3, 44.0, 43.5, 20.1; HRMS (EI) calc'd for C<sub>14</sub>H<sub>15</sub>N (M<sup>+</sup>) 197.1204, found 197.1202.

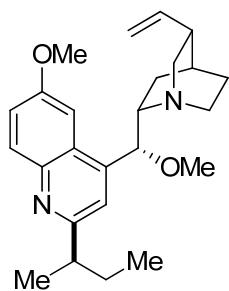

**9-*O*-Methyl-2'-*sec*-butylquinine (4j):** The reaction was performed according to the general procedure for the alkylation with 9-*O*-methylquinine *N*-oxide (35 mg, 0.10 mmol), **2b** (93 mg, 0.30 mmol) and NaOMe (16 mg, 0.30 mmol) in anhydrous toluene (1.0 mL) at 120 °C for 6 h. The crude mixture was purified by column chromatography on silica gel (EtOAc:MeOH, 100:0 to 20:1) to give compound **4j** as an orange oil (34 mg, 86%); <sup>1</sup>H NMR (500 MHz, CDCl<sub>3</sub>) δ 7.99 – 7.97 (d, *J* = 9.2 Hz, 1H), 7.34 – 7.32 (m, 2H), 7.25 – 7.24 (m, 1H), 5.72 – 5.65 (m, 1H), 5.07 (s, 1H), 4.94 – 4.91 (d, *J* = 17.1 Hz, 1H), 4.89 – 4.87 (d, *J* = 10.3 Hz, 1H), 3.92 (s, 3H), 3.52 – 3.46 (m, 1H), 3.32 (s, 3H), 3.14 – 3.09 (m, 1H), 3.06 – 3.03 (m, 1H), 2.98 – 2.94 (m, 1H), 2.76 – 2.70 (m, 1H), 2.67 – 2.63 (m, 1H), 2.29 – 2.25 (m, 1H), 1.86 – 1.67 (m, 5H), 1.54 – 1.49 (m, 1H), 1.46 – 1.40 (m, 1H), 1.36 – 1.34 (d, *J* = 7.0 Hz, 3H), 0.88 – 0.85 (t, *J* = 7.4 Hz,

3H);  $^{13}\text{C}$  NMR (126 MHz,  $\text{CDCl}_3$ )  $\delta$  164.2, 157.4, 144.3, 144.3, 141.9, 131.5, 126.0, 121.2, 116.9, 114.5, 101.3, 83.1, 60.0, 57.3, 57.1, 55.9, 44.5, 43.5, 40.2, 30.2, 28.1, 27.7, 21.6, 20.5, 12.3; HRMS (EI) calc'd for  $\text{C}_{24}\text{H}_{32}\text{N}_2\text{O}_2$  ( $\text{M}^+$ ) 394.2620, found 394.2617.

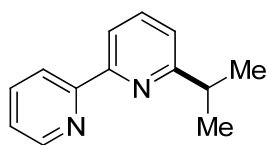

**6-Isopropyl-2,2'-bipyridine (6a):** The reaction was performed according to the general procedure for the alkylation with 2,2'-bipyridine-*N*-oxide (34 mg, 0.20 mmol), **2a** (120 mg, 0.40 mmol) and NaOMe (32 mg, 0.60 mmol) in anhydrous toluene (2.0 mL) at 120 °C for 3 h. The crude mixture was purified by column chromatography on silica gel (*n*-hexane:EtOAc, 60:1 to 30:1) to give compound **6a** as a light yellow oil (25 mg, 63%);  $^1\text{H}$  NMR (500 MHz,  $\text{CDCl}_3$ )  $\delta$  8.66 – 8.65 (d,  $J$  = 4.5 Hz, 1H), 8.51 – 8.49 (d,  $J$  = 8.0 Hz, 1H), 8.21 – 8.19 (d,  $J$  = 7.8 Hz, 1H), 7.80 – 7.77 (td,  $J$  = 7.7, 1.6 Hz, 1H), 7.73 – 7.70 (t,  $J$  = 7.7 Hz, 1H), 7.27 – 7.25 (m, 1H), 7.18 – 7.16 (d,  $J$  = 7.7 Hz, 1H), 3.18 – 3.09 (hept,  $J$  = 6.8 Hz, 1H), 1.37 – 1.36 (d,  $J$  = 6.9 Hz, 6H);  $^{13}\text{C}$  NMR (126 MHz,  $\text{CDCl}_3$ )  $\delta$  166.7, 156.9, 155.2, 149.1, 137.2, 136.9, 123.5, 121.3, 120.8, 118.3, 36.5, 22.8; The obtained  $^1\text{H}$  and  $^{13}\text{C}$ -NMR were in agreement with the literature.<sup>11</sup>

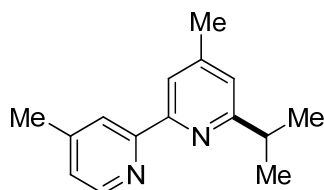

**6-Isopropyl-4,4'-dimethyl-2,2'-bipyridine (6b):** The reaction was performed according to the general procedure for the alkylation with 4,4'-dimethyl-2,2'-bipyridine-*N*-oxide (40 mg, 0.20 mmol), **2a** (120 mg, 0.40 mmol) and NaOMe (32 mg, 0.60 mmol) in anhydrous toluene (2.0 mL) at 120 °C for 3 h. The crude mixture was purified by column chromatography on silica



gel (*n*-hexane:EtOAc, 10:1) to give compound **6b** as a white solid (30 mg, 66%); <sup>1</sup>H NMR (300 MHz, CDCl<sub>3</sub>) δ 8.52 – 8.50 (d, *J* = 4.9 Hz, 1H), 8.29 – 8.28 (m, 1H), 8.01 – 8.00 (m, 1H), 7.10 – 7.08 (m, 1H), 7.01 – 7.00 (m, 1H), 3.17 – 3.03 (hept, *J* = 6.9 Hz, 1H), 2.43 (s, 3H), 2.39 (s, 3H), 1.36 – 1.34 (d, *J* = 6.9 Hz, 6H); <sup>13</sup>C NMR (75 MHz, CDCl<sub>3</sub>) δ 166.7, 156.8, 155.2, 148.9, 148.2, 148.0, 124.5, 122.2, 121.5, 119.4, 36.4, 22.9, 21.3; HRMS (EI) calc'd for C<sub>15</sub>H<sub>18</sub>N<sub>2</sub> (M<sup>+</sup>) 226.1470, found 226.1472.

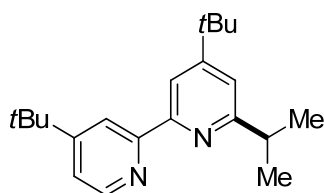

**4,4'-Di-*tert*-butyl-6-isopropyl-2,2'-bipyridine (6c):** The reaction was performed according to the general procedure for the alkylation with 4,4'-di-*tert*-butyl-2,2'-bipyridine-*N*-oxide (57 mg, 0.20 mmol), **2a** (120 mg, 0.40 mmol) and NaOMe (32 mg, 0.60 mmol) in anhydrous toluene (2.0 mL) at 120 °C for 3 h. The crude mixture was purified by column chromatography on silica gel (*n*-hexane:EtOAc, 30:1) to give compound **6c** as a white solid (45 mg, 72%); <sup>1</sup>H NMR (500 MHz, CDCl<sub>3</sub>) δ 8.59 – 8.58 (d, *J* = 5.2 Hz, 1H), 8.52 – 8.52 (d, *J* = 1.9 Hz, 1H), 8.21 – 8.20 (d, *J* = 1.8 Hz, 1H), 7.28 – 7.26 (dd, *J* = 5.3, 2.0 Hz, 1H), 7.17 – 7.17 (d, *J* = 1.8 Hz, 1H), 3.18 – 3.10 (hept, *J* = 6.9 Hz, 1H), 1.39 – 1.38 (m, 24H); <sup>13</sup>C NMR (126 MHz, CDCl<sub>3</sub>) δ 166.5, 161.2, 160.7, 157.3, 155.6, 149.0, 120.6, 118.6, 117.7, 115.6, 36.6, 35.1, 35.0, 30.9, 30.7, 22.9; The obtained <sup>1</sup>H and <sup>13</sup>C-NMR were in agreement with the literature.<sup>8</sup>

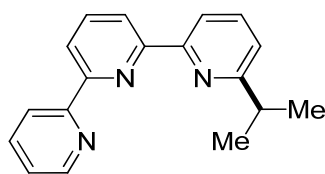

**6-Isopropyl-2,2':6',2''-terpyridine (6d):** The reaction was performed according to the general procedure for the alkylation with 2,2':6',2''-terpyridine-*N*-oxide (50 mg, 0.20 mmol), **2a** (120

mg, 0.40 mmol) and NaOMe (32 mg, 0.60 mmol) in anhydrous toluene (2.0 mL) at 120 °C for 3 h. The crude mixture was purified by column chromatography on silica gel (*n*-hexane:benzene:Et<sub>2</sub>O, 10:3:1) to give compound **6d** as light yellow solid (39 mg, 71%); <sup>1</sup>H NMR (500 MHz, CDCl<sub>3</sub>) δ 8.71 – 8.69 (ddd, *J* = 4.8, 1.8, 0.9 Hz, 1H), 8.64 – 8.62 (dt, *J* = 7.9, 1.2 Hz, 1H), 8.56 – 8.55 (dd, *J* = 7.8, 1.0 Hz, 1H), 8.44 – 8.41 (ddd, *J* = 7.8, 5.1, 1.0 Hz, 2H), 7.96 – 7.93 (t, *J* = 7.8 Hz, 1H), 7.86 – 7.83 (td, *J* = 7.7, 1.8 Hz, 1H), 7.77 – 7.74 (t, *J* = 7.8 Hz, 1H), 7.33 – 7.30 (ddd, *J* = 7.5, 4.8, 1.2 Hz, 1H), 7.21 – 7.19 (d, *J* = 7.6 Hz, 1H), 3.20 – 3.11 (hept, *J* = 7.0 Hz, 1H), 1.39 – 1.38 (d, *J* = 6.9 Hz, 6H); <sup>13</sup>C NMR (126 MHz, CDCl<sub>3</sub>) δ 166.7, 156.6, 156.1, 155.3, 155.3, 149.2, 137.9, 137.2, 137.0, 123.8, 121.3, 121.3, 120.9, 120.8, 118.4, 36.5, 22.8.; HRMS (EI) calc'd for C<sub>18</sub>H<sub>17</sub>N<sub>3</sub> (M<sup>+</sup>) 275.1422, found 275.1425.

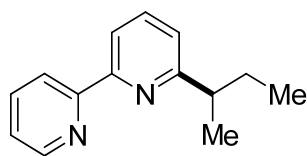

**6-(*sec*-Butyl)-2,2'-bipyridine (6e):** The reaction was performed according to the general procedure for the alkylation with 2,2'-bipyridine-*N*-oxide (34 mg, 0.20 mmol), **2b** (124 mg, 0.40 mmol) and NaOMe (32 mg, 0.60 mmol) in anhydrous toluene (2.0 mL) at 120 °C for 3 h. The crude mixture was purified by column chromatography on silica gel (*n*-hexane:Et<sub>2</sub>O, 20:1) to give compound **6e** as a light red oil (31 mg, 73%); <sup>1</sup>H NMR (500 MHz, CDCl<sub>3</sub>) δ 8.67 – 8.65 (m, 1H), 8.50 – 8.48 (dt, *J* = 7.8, 1.1 Hz, 1H), 8.20 – 8.18 (dd, *J* = 7.7, 1.0 Hz, 1H), 7.82 – 7.79 (td, *J* = 7.7, 1.8 Hz, 1H), 7.73 – 7.70 (t, *J* = 7.7 Hz, 1H), 7.29 – 7.27 (ddd, *J* = 7.5, 4.8, 1.2 Hz, 1H), 7.15 – 7.13 (dd, *J* = 7.7, 1.0 Hz, 1H), 2.90 – 2.83 (h, *J* = 6.9 Hz, 1H), 1.89 – 1.81 (m, 1H), 1.72 – 1.63 (m, 1H), 1.35 – 1.33 (d, *J* = 7.0 Hz, 3H), 0.90 – 0.87 (t, *J* = 7.4 Hz, 3H); <sup>13</sup>C NMR (126 MHz, CDCl<sub>3</sub>) δ 166.0, 157.0, 155.4, 149.1, 137.1, 136.9, 123.6, 121.8, 121.4, 118.3, 43.8, 30.1, 20.6, 12.3; HRMS (EI) calc'd for C<sub>14</sub>H<sub>16</sub>N<sub>2</sub> (M<sup>+</sup>) 212.1313, found 212.1310.

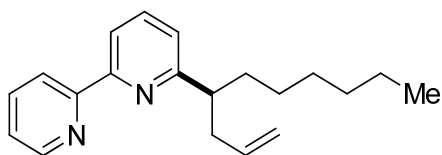

**6-(Dec-1-en-4-yl)-2,2'-bipyridine (6f):** The reaction was performed according to the general procedure for the alkylation with 2,2'-bipyridine-*N*-oxide (34 mg, 0.20 mmol), **2e** (157 mg, 0.40 mmol) and NaOMe (32 mg, 0.60 mmol) in anhydrous toluene (2.0 mL) at 120 °C for 3 h. The crude mixture was purified by column chromatography on silica gel (*n*-hexane:EtOAc, 30:1) to give compound **6f** as a light yellow oil (46 mg, 78%); <sup>1</sup>H NMR (500 MHz, CDCl<sub>3</sub>) δ 8.67 – 8.65 (m, 1H), 8.50 – 8.49 (d, *J* = 7.9 Hz, 1H), 8.21 – 8.20 (d, *J* = 7.8 Hz, 1H), 7.82 – 7.78 (td, *J* = 7.7, 1.8 Hz, 1H), 7.71 – 7.68 (t, *J* = 7.7 Hz, 1H), 7.29 – 7.26 (ddd, *J* = 7.6, 4.9, 1.1 Hz, 1H), 7.09 – 7.08 (d, *J* = 7.6 Hz, 1H), 5.77 – 5.69 (ddt, *J* = 17.1, 10.1, 7.0 Hz, 1H), 4.99 – 4.95 (m, 1H), 4.92 – 4.89 (m, 1H), 2.90 – 2.84 (tt, 8.7, 5.7 Hz, 1H), 2.63 – 2.56 (m, 1H), 2.48 – 2.43 (m, 1H), 1.85 – 1.78 (m, 1H), 1.75 – 1.68 (m, 1H), 1.30 – 1.18 (m, 8H), 0.85 – 0.82 (t, *J* = 6.9 Hz, 3H); <sup>13</sup>C NMR (126 MHz, CDCl<sub>3</sub>) δ 164.1, 157.0, 155.5, 149.1, 137.4, 136.9, 136.8, 123.5, 123.0, 121.4, 118.3, 115.8, 47.7, 40.1, 35.1, 31.9, 29.5, 27.5, 22.8, 14.2; HRMS (EI) calc'd for C<sub>20</sub>H<sub>26</sub>N<sub>2</sub> (M<sup>+</sup>) 294.2096, found 294.2093.

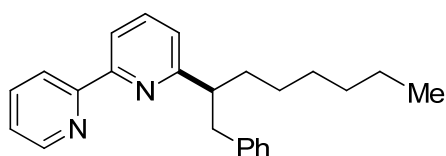

**6-(1-Phenyloctan-2-yl)-2,2'-bipyridine (6g):** The reaction was performed according to the general procedure for the alkylation with 2,2'-bipyridine-*N*-oxide (34 mg, 0.20 mmol), **2f** (180 mg, 0.40 mmol) and NaOMe (32 mg, 0.60 mmol) in anhydrous toluene (2.0 mL) at 120 °C for 3 h. The crude mixture was purified by column chromatography on silica gel (*n*-hexane:benzene:EtOAc, 60:20:3) to give compound **6g** as a light yellow oil (63 mg, 91%); <sup>1</sup>H NMR (500 MHz, CDCl<sub>3</sub>) δ 8.69 – 8.68 (m, 1H), 8.55 – 8.53 (d, *J* = 8.0 Hz, 1H), 8.22 – 8.20

(d,  $J = 7.7$  Hz, 1H), 7.85 – 7.81 (td,  $J = 7.7$ , 1.8 Hz, 1H), 7.63 – 7.60 (t,  $J = 7.7$  Hz, 1H), 7.31 – 7.29 (m, 1H), 7.20 – 7.17 (m, 2H), 7.14 – 7.10 (m, 1H), 7.06 – 7.04 (m, 2H), 6.93 – 6.91 (d,  $J = 7.5$  Hz, 1H), 3.20 – 3.16 (dd,  $J = 12.9$ , 8.0 Hz, 1H), 3.11 – 3.05 (m, 1H), 3.03 – 2.99 (dd,  $J = 12.9$ , 6.1 Hz, 1H), 1.97 – 1.90 (m, 1H), 1.78 – 1.71 (m, 1H), 1.31 – 1.16 (m, 8H), 0.86 – 0.83 (t,  $J = 7.0$  Hz, 3H);  $^{13}\text{C}$  NMR (126 MHz,  $\text{CDCl}_3$ )  $\delta$  163.6, 157.0, 155.5, 149.1, 141.1, 136.9, 136.7, 129.3, 128.1, 125.7, 123.6, 123.5, 121.4, 118.3, 50.0, 42.3, 35.1, 31.9, 29.5, 27.6, 22.7, 14.2; HRMS (EI) calc'd for  $\text{C}_{24}\text{H}_{28}\text{N}_2$  ( $\text{M}^+$ ) 344.2252, found 344.2253.

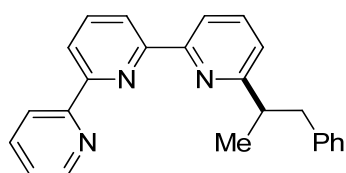

**6-(1-Phenylpropan-2-yl)-2,2':6',2''-terpyridine (6h):** The reaction was performed according to the general procedure for the alkylation with 2,2':6',2''-terpyridine-*N*-oxide (50 mg, 0.20 mmol), **2c** (150 mg, 0.40 mmol) and NaOMe (32 mg, 0.60 mmol) in anhydrous toluene (2.0 mL) at 120 °C for 3 h. The crude mixture was purified by column chromatography on silica gel (*n*-hexane:Et<sub>2</sub>O, 10:1) to give compound **6h** as a light yellow oil (57 mg, 81%);  $^1\text{H}$  NMR (500 MHz,  $\text{CDCl}_3$ )  $\delta$  8.72 (d,  $J = 4.6$  Hz, 1H), 8.65 (d,  $J = 7.9$  Hz, 1H), 8.59 (d,  $J = 7.7$  Hz, 1H), 8.45 (dd,  $J = 13.0$ , 7.8 Hz, 2H), 7.98 (t,  $J = 7.8$  Hz, 1H), 7.86 (td,  $J = 7.7$ , 1.8 Hz, 1H), 7.70 (t,  $J = 7.7$  Hz, 1H), 7.36 – 7.31 (m, 1H), 7.24 (m, 2H), 7.19 – 7.12 (m, 3H), 7.05 (d,  $J = 7.6$  Hz, 1H), 3.28 (m, 2H), 2.94 (m, 1H), 1.39 (d,  $J = 6.4$  Hz, 3H);  $^{13}\text{C}$  NMR (126 MHz,  $\text{CDCl}_3$ )  $\delta$  164.8, 156.5, 156.0, 155.5, 155.3, 149.2, 141.1, 137.9, 137.0(137.01), 137.0(136.95), 129.3, 128.4, 128.2, 125.9, 123.8, 122.2, 121.3, 120.9, 118.5, 44.0, 43.5, 20.4.; HRMS (EI) calc'd for  $\text{C}_{24}\text{H}_{21}\text{N}_3$  ( $\text{M}^+$ ) 351.1735, found 351.1733.

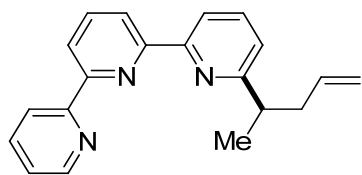

**6-(Pent-4-en-2-yl)-2,2':6',2''-terpyridine (6i):** The reaction was performed according to the general procedure for the alkylation with 2,2':6',2''-terpyridine-*N*-oxide (50 mg, 0.20 mmol), **2g** (130 mg, 0.40 mmol) and NaOMe (32 mg, 0.60 mmol) in anhydrous toluene (2.0 mL) at 120 °C for 3 h. The crude mixture was purified by column chromatography on silica gel (*n*-hexane:Et<sub>2</sub>O, 10:1) to give compound **6i** as a light yellow oil (46 mg, 76%); <sup>1</sup>H NMR (500 MHz, CDCl<sub>3</sub>) δ 8.71 – 8.69 (m, 1H), 8.64 – 8.62 (m, 1H), 8.55 – 8.54 (dd, *J* = 7.8, 1.0 Hz, 1H), 8.44 – 8.43 (dd, *J* = 3.3, 1.0 Hz, 1H), 8.43 – 8.42 (dd, *J* = 3.3, 1.0 Hz, 1H), 7.96 – 7.93 (t, *J* = 7.8 Hz, 1H), 7.87 – 7.84 (td, *J* = 7.7, 1.8 Hz, 1H), 7.77 – 7.74 (t, *J* = 7.7 Hz, 1H), 7.34 – 7.30 (ddd, *J* = 7.5, 4.7, 1.2 Hz, 1H), 7.17 – 7.15 (d, *J* = 7.7, 1H), 5.84 – 5.76 (m, 1H), 5.06 – 5.01 (m, 1H), 4.98 – 4.96 (m, 1H), 3.10 – 3.03 (h, *J* = 7.0 Hz, 1H), 2.69 – 2.63 (m, 1H), 2.45 – 2.39 (m, 1H), 1.38 – 1.37 (d, *J* = 7.0 Hz, 3H); <sup>13</sup>C NMR (126 MHz, CDCl<sub>3</sub>) δ 165.1, 156.5, 156.1, 155.5, 155.3, 149.2, 137.9, 137.3, 137.1, 137.0, 123.8, 121.9, 121.3, 120.8, 118.5, 116.1, 41.9, 41.4, 20.5; HRMS (EI) calc'd for C<sub>15</sub>H<sub>18</sub>N<sub>2</sub> (M<sup>+</sup>) 301.1579, found 301.1576.

## 5. General procedure for synthetic applications

### 5.1 Scale-up reaction

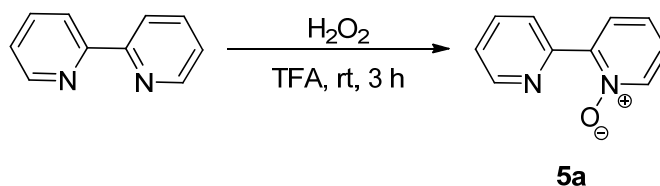

**2,2'-bipyridine-*N*-oxide (5a):** The reaction was performed according to the literature procedure.<sup>13</sup> To a 100 mL round bottom flask containing a stir bar were added 2,2'-bipyridine (1.6 g, 10 mmol) and trifluoroacetic acid (8 mL) under air. The solution was cooled to 10 °C, and then 1.6 mL of 30% hydrogen peroxide solution (12 mmol) was added. The reaction mixture was stirred for 3 h at room temperature. The organic phase was diluted with chloroform (30 mL) and washed with 3 M NaOH (15 mL x 2). The aqueous phase was extracted twice with chloroform (20 mL x 3), and the combined organic layers were dried over MgSO<sub>4</sub>, filtered and concentrated under reduced pressure. The product **5a** was obtained as a white solid (1.6 g, 95%). <sup>1</sup>H NMR (300 MHz, CDCl<sub>3</sub>) δ 8.94 – 8.90 (dt, *J* = 8.1, 1.1 Hz, 1H), 8.75 – 8.72 (ddd, *J* = 4.9, 1.8, 0.9 Hz, 1H), 8.34 – 8.32 (dd, *J* = 6.4, 1.3 Hz, 1H), 8.20 – 8.16 (dd, *J* = 8.0, 2.3 Hz, 1H), 7.86 – 7.80 (td, *J* = 7.8, 1.9 Hz, 1H), 7.39 – 7.33 (m, 2H), 7.30 – 7.25 (m, 1H); <sup>13</sup>C NMR (75 MHz, CDCl<sub>3</sub>) δ 149.3, 149.1, 146.9, 140.3, 135.9, 127.5, 125.4, 125.1, 125.0, 124.0.

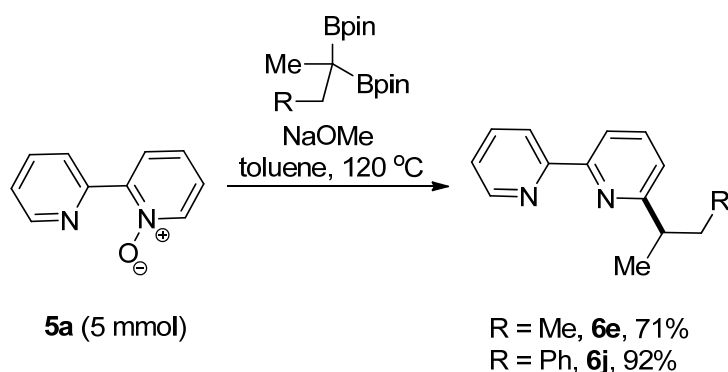

To a 100 mL round bottom flask equipped with a magnetic stirbar, 2,2'-bipyridine-*N*-oxide (**5a**, 860 mg, 5.0 mmol), **2b** (3.1 g, 10 mmol) or **2c** (3.7 g, 10 mmol), NaOMe (810 mg, 15 mmol)

and toluene (50 mL) were added under N<sub>2</sub>. The reaction mixture was stirred for 3 h at 120 °C. The reaction was quenched with a brine (20 mL) and the aqueous layer was extracted with EtOAc (30 mL x 3). The combined organic layers were dried over MgSO<sub>4</sub>, filtered and concentrated under reduced pressure. To remove unreacted **2b** or **2c**, NaBO<sub>3</sub>·4H<sub>2</sub>O (1.2 g, 12 mmol) and THF/H<sub>2</sub>O (20 mL, 1:1) were added to the above obtained crude mixture in a 100 mL round bottom flask. The solution was stirred for 3 h at room temperature. The reaction mixture was quenched with brine (15 mL) and extracted with EtOAc (20 mL x 3). The combined organic layers were dried over MgSO<sub>4</sub>, filtered and concentrated under reduced pressure. The crude reaction mixture was purified by silica gel column chromatography (*n*-hexane:EtOAc, 20:1) to give compound **6e** (754 mg, 71%) or **6j** (1.26 g, 92%).

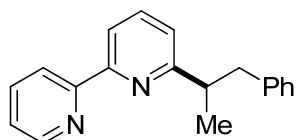

**6-(1-Phenylpropan-2-yl)-2,2'-bipyridine (6j)**: a light yellow oil. <sup>1</sup>H NMR (500 MHz, CDCl<sub>3</sub>) δ 8.70 – 8.69 (d, *J* = 4.8 Hz, 1H), 8.55 – 8.54 (d, *J* = 8.0 Hz, 1H), 8.24 – 8.23 (d, *J* = 7.8 Hz, 1H), 7.85 – 7.81 (m, 1H), 7.69 – 7.65 (t, *J* = 7.8 Hz, 1H), 7.31 – 7.29 (m, 1H), 7.25 – 7.22 (m, 2H), 7.18 – 7.12 (m, 3H), 7.05 – 7.03 (d, *J* = 7.6 Hz, 1H), 3.31 – 3.22 (m, 2H), 2.96 – 2.90 (m, 1H), 1.39 – 1.37 (d, *J* = 6.5 Hz, 3H); <sup>13</sup>C NMR (126 MHz, CDCl<sub>3</sub>) δ 164.8, 156.8, 155.4, 149.1, 141.0, 137.1, 136.9, 129.3, 128.2, 125.9, 123.6, 122.1, 121.3, 118.4, 43.9, 43.5, 20.4; HRMS (EI) calc'd for C<sub>19</sub>H<sub>18</sub>N<sub>2</sub> (M<sup>+</sup>) 274.1470, found 274.1468.

## 5.2. Sequential functionalization of 2,2'-bipyridine *N*-oxide

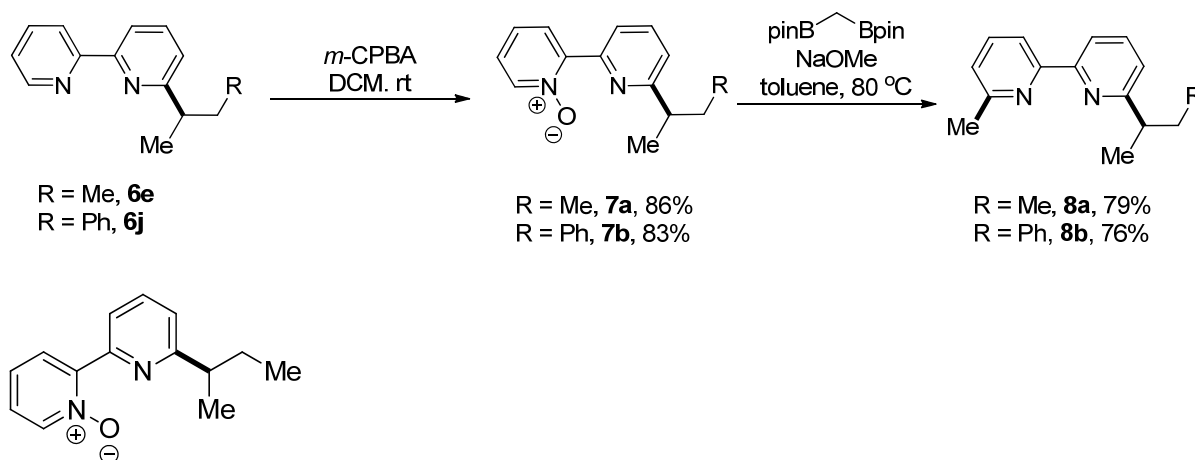

**6'-(*sec*-Butyl)-2,2'-bipyridine-*N*-oxide (7a):** To a 20 mL vial equipped with a magnetic stirbar, the above obtained product **6e** (754 mg, 3.55 mmol), *m*-chloroperbenzoic acid (70 wt%, 1.06 g, 4.3 mmol) and CH<sub>2</sub>Cl<sub>2</sub> (15 mL) were added under N<sub>2</sub>. The vial was sealed with a PTFE/silicone-lined septum cap and the mixture was stirred for 12 h at room temperature and then the organic phase was washed with a saturated aqueous NaHCO<sub>3</sub> solution (10 mL) and brine (10 mL). The aqueous layer was extracted with chloroform (20 mL x 5). The combined organic layers were dried over MgSO<sub>4</sub>, filtered and concentrated under reduced pressure. The crude mixture was purified by column chromatography on silica gel (EtOAc:MeOH, 10:1) to give the product **7a** as a yellow liquid (697 mg, 86%); <sup>1</sup>H NMR (500 MHz, CDCl<sub>3</sub>) δ 8.77 – 8.76 (m, 1H), 8.32 – 8.30 (m, 1H), 8.27 – 8.25 (dd, *J* = 8.1, 2.1 Hz, 1H), 7.75 – 7.72 (t, *J* = 7.8 Hz, 1H), 7.38 – 7.34 (m, 1H), 7.26 – 7.22 (ddd, *J* = 7.4, 6.5, 2.2 Hz, 1H), 7.19 – 7.17 (m, 1H), 2.89 – 2.82 (h, *J* = 6.9 Hz, 1H), 1.85 – 1.76 (m, 1H), 1.69 – 1.61 (m, 1H), 1.32 – 1.30 (d, *J* = 6.9 Hz, 3H), 0.88 – 0.85 (t, *J* = 7.4 Hz, 3H); <sup>13</sup>C NMR (126 MHz, CDCl<sub>3</sub>) δ 166.2, 148.6, 148.0, 140.8, 136.6, 128.2, 125.8, 125.0, 122.9, 122.5, 43.8, 30.1, 20.6, 12.3; HRMS (EI) calc'd for C<sub>14</sub>H<sub>16</sub>N<sub>2</sub>O (M<sup>+</sup>) 228.1263, found 228.1261.



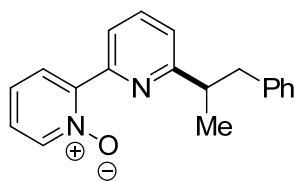

**6'-(1-Phenylpropan-2-yl)-2,2'-bipyridine-*N*-oxide (7b):** To a 50 mL round bottomed flask equipped with a magnetic stirbar, the above obtained product **6j** (1.26 g, 4.6 mmol), *m*-chloroperbenzoic acid (70 wt%, 1.36 g, 5.5 mmol) and CH<sub>2</sub>Cl<sub>2</sub> (15 mL) were added under N<sub>2</sub>. The mixture was stirred for 12 h at room temperature and then the organic phase was washed with a saturated aqueous NaHCO<sub>3</sub> solution (10 mL) and brine (10 mL). The aqueous layer was extracted with chloroform (20 mL x 5). The combined organic layers were dried over MgSO<sub>4</sub>, filtered and concentrated under reduced pressure. The crude mixture was purified by column chromatography on silica gel (EtOAc:MeOH, 10:1) to give the product **7b** as a colorless solid (1.11 g, 83%); <sup>1</sup>H NMR (500 MHz, CDCl<sub>3</sub>) δ 8.79 – 8.77 (m, 1H), 8.30 – 8.29 (m, 1H), 8.22 – 8.20 (dd, *J* = 8.1, 2.2 Hz, 1H), 7.69 – 7.65 (t, *J* = 7.8 Hz, 1H), 7.36 – 7.32 (td, *J* = 7.8, 1.3 Hz, 1H), 7.24 – 7.20 (m, 3H), 7.16 – 7.13 (m, 1H), 7.09 – 7.07 (d, *J* = 7.8 Hz, 3H), 3.29 – 3.22 (h, *J* = 7.0 Hz, 1H), 3.15 – 3.11 (dd, *J* = 13.4, 7.2 Hz, 1H), 2.91 – 2.87 (dd, *J* = 13.4, 7.6 Hz, 1H), 1.34 – 1.32 (d, *J* = 6.9 Hz, 3H); <sup>13</sup>C NMR (126 MHz, CDCl<sub>3</sub>) δ 165.0, 148.6, 147.7, 140.7, 140.7, 136.5, 129.2, 128.2, 128.1, 125.9, 125.7, 125.0, 123.0, 122.7, 43.9, 43.4, 20.3; HRMS (EI) calc'd for C<sub>19</sub>H<sub>18</sub>N<sub>2</sub>O (M<sup>+</sup>) 290.1419, found 290.1421.

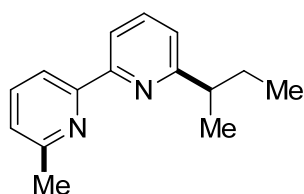

**6-(*sec*-Butyl)-6'-methyl-2,2'-bipyridine (8a):** To a 50 mL round bottomed flask equipped with a magnetic stirbar, the above obtained product **7a** (697 mg, 3.05 mmol), bis[(pinacolato)boryl]methane **B1** (1.60 g, 6.0 mmol), NaOMe (478 mg, 8.85 mmol) and

anhydrous toluene (30 mL) were added under N<sub>2</sub>. The reaction mixture was stirred at 80 °C for 3 h. To remove unreacted bis[(pinacolato)boryl]methane, NaBO<sub>3</sub>·4H<sub>2</sub>O (1.38 g, 9.00 mmol) and THF/H<sub>2</sub>O (25 mL, 1:1) were added and stirred for 3 h at room temperature. The reaction mixture was quenched with brine (15 mL) and extracted with EtOAc (25 mL x 3). The combined organic layers were dried over MgSO<sub>4</sub>, filtered and concentrated under reduced pressure. The crude mixture was purified by column chromatography on silica gel (*n*-hexane:EtOAc, 20:1) to give the product **8a** as a light yellow oil (545 mg, 79%); <sup>1</sup>H NMR (300 MHz, CDCl<sub>3</sub>) δ 8.27 – 8.25 (d, *J* = 7.8 Hz, 1H), 8.22 – 8.19 (dd, *J* = 7.8, 0.9 Hz, 1H), 7.72 – 7.65 (td, *J* = 7.7, 5.4 Hz, 2H), 7.15 – 7.10 (td, *J* = 7.3, 1.0 Hz, 2H), 2.92 – 2.80 (h, *J* = 6.9 Hz, 1H), 2.62 (s, 3H), 1.92 – 1.77 (m, 1H), 1.73 – 1.59 (m, 1H), 1.34 – 1.32 (d, *J* = 6.9 Hz, 3H), 0.90 – 0.85 (t, *J* = 7.4 Hz, 3H); <sup>13</sup>C NMR (75 MHz, CDCl<sub>3</sub>) δ 165.9, 157.8, 156.4, 155.7, 137.1, 137.0, 123.0, 121.5, 118.4(118.37), 118.4(118.35), 43.8, 30.1, 24.8, 20.6, 12.3; HRMS (EI) calc'd for C<sub>15</sub>H<sub>18</sub>N<sub>2</sub> (M<sup>+</sup>) 226.1470, found 226.1473.

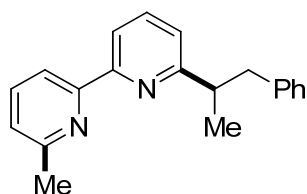

**6-Methyl-6'-(1-phenylpropan-2-yl)-2,2'-bipyridine (8b):** To a 100 mL round bottomed flask equipped with a magnetic stirbar, the above obtained product **7b** (1.11 g, 3.8 mmol), bis[(pinacolato)boryl]methane **B1** (2.05 g, 7.65 mmol), NaOMe (620 mg, 11.5 mmol) and anhydrous toluene (38 mL) were added under N<sub>2</sub>. The reaction mixture was stirred at 80 °C for 3 h. To remove unreacted bis[(pinacolato)boryl]methane, NaBO<sub>3</sub>·4H<sub>2</sub>O (1.77 g, 11.5 mmol) and THF/H<sub>2</sub>O (25 mL, 1:1) were added and stirred for 3 h at room temperature. The reaction mixture was quenched with brine (15 mL) and extracted with EtOAc (25 mL x 3). The combined organic layers were dried over MgSO<sub>4</sub>, filtered and concentrated under reduced

pressure. The crude mixture was purified by column chromatography on silica gel (*n*-hexane:EtOAc, 50:1 to 20:1) to give the product **8b** as a light yellow oil (833 mg, 76%);  $^1\text{H}$  NMR (500 MHz,  $\text{CDCl}_3$ )  $\delta$  8.33 – 8.31 (d,  $J$  = 7.8 Hz, 1H), 8.25 – 8.23 (d,  $J$  = 7.8 Hz, 1H), 7.73 – 7.70 (t,  $J$  = 7.7 Hz, 1H), 7.67 – 7.64 (t,  $J$  = 7.7 Hz, 1H), 7.24 – 7.21 (m, 2H), 7.17 – 7.14 (m, 2H), 7.12 – 7.11 (d,  $J$  = 7.2 Hz, 2H), 7.02 – 7.00 (d,  $J$  = 7.6 Hz, 1H), 3.29 – 3.21 (m, 2H), 2.95 – 2.89 (m, 1H), 2.65 (s, 3H), 1.37 – 1.36 (d,  $J$  = 6.7 Hz, 3H);  $^{13}\text{C}$  NMR (126 MHz,  $\text{CDCl}_3$ )  $\delta$  164.8, 157.8, 156.3, 155.7, 141.1, 137.1, 137.0, 129.3, 128.2, 125.9, 123.1, 121.9, 118.5, 118.3, 44.0, 43.5, 24.8, 20.4.; HRMS (EI) calc'd for  $\text{C}_{20}\text{H}_{20}\text{N}_2$  ( $\text{M}^+$ ) 288.1626, found 288.1623.

## 6. Proposed Reaction Mechanism

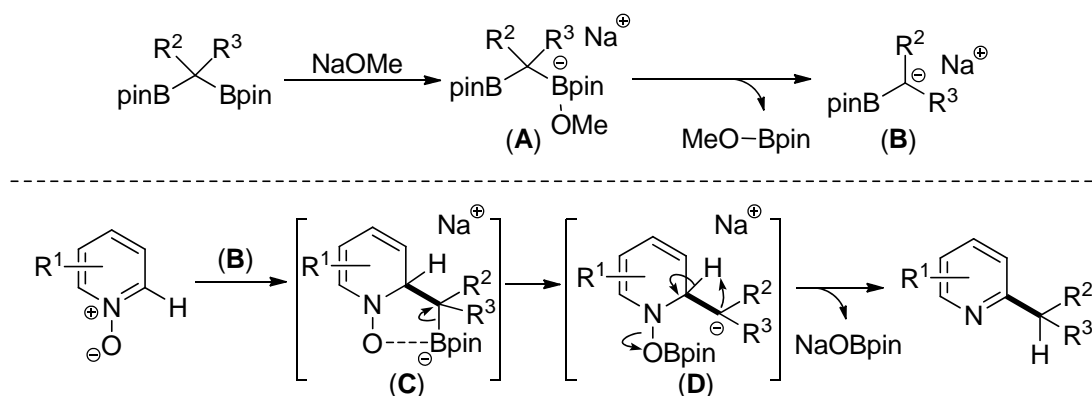

Although more detailed mechanistic studies are still required, we proposed that  $\alpha$ -borylcarbanion, generated *in-situ* by the reaction between *gem*-bis[(pinacolato)boryl]alkane and alkoxide base, could attack the electrophilic C2 position of N-heteroaromatic N-oxide and subsequent Bpin migration from benzylic position to oxygen atom was expected to generate benzylic anion. Finally, a proton migration of C2-H to the benzylic position, followed by releasing NaOBpin would generate the desired alkylated products.

## 7. References

- (1) T. Nishida, H. Ida, Y. Kuninobu and M. Kanai, *Nat. Commun.*, 2014, **5**, 3387.
- (2) W. Jo, J. Kim, S. Choi and S. H. Cho, *Angew. Chem., Int. Ed.*, 2016, **55**, 9690-9694.
- (3) Z.-Q. Zhang, C.-T. Yang, L.-J. Liang, B. Xiao, X. Lu, J.-H. Liu, Y.-Y. Sun, T. B. Marder and Y. Fu, *Org. Lett.*, 2014, **16**, 6342-6345.
- (4) B. Potter, E. K. Edelstein and J. P. Morken, *Org. Lett.*, 2016, **18**, 3286-3289.
- (5) G. Shan, X. Sun, Q. Xia and Y. Rao, *Org. Lett.*, 2011, **13**, 5770-5773.
- (6) M. A. Fakhfakh, X. Franck, A. Fournet, R. Hocquemiller, and B. Figadère *Tetrahedron Lett.*, 2001, **42**, 3847-3850.
- (7) M. Kitamura, M. Yoshida, T. Kikuchi, and K. Narasaka *Synthesis*, 2003, **2003**, 2415-2426.
- (8) S. Paul and J. Guin, *Chem. -Eur. J.*, 2015, **21**, 17618-17622.
- (9) S. Michlik and R. Kempe, *Angew. Chem., Int. Ed.*, 2013, **52**, 6326-6329.
- (10) I. Hyodo, M. Tobisu and N. Chatani, *Chem. Asian J.*, 2012, **7**, 1357-1365.
- (11) H. Andersson, F. Almqvist and R. Olsson, *Org. Lett.*, 2007, **9**, 1335-1337.
- (12) Y. Yang, K. Niedermann, C. Han and S. L. Buchwald, *Org. Lett.*, 2014, **16**, 4638-4641.
- (13) M. Zalas, B. Gierczyk, M. Klein, K. Siuzdak and T. Łuczak, *Polyhedron*, 2014, **67**, 381-387.

## *Appendix I*

### **Spectral Copies of $^1\text{H}$ and $^{13}\text{C}$ NMR Data Obtained in this Study**

***gem*-Bis[(pinacolato)boryl]heptane (B3)**

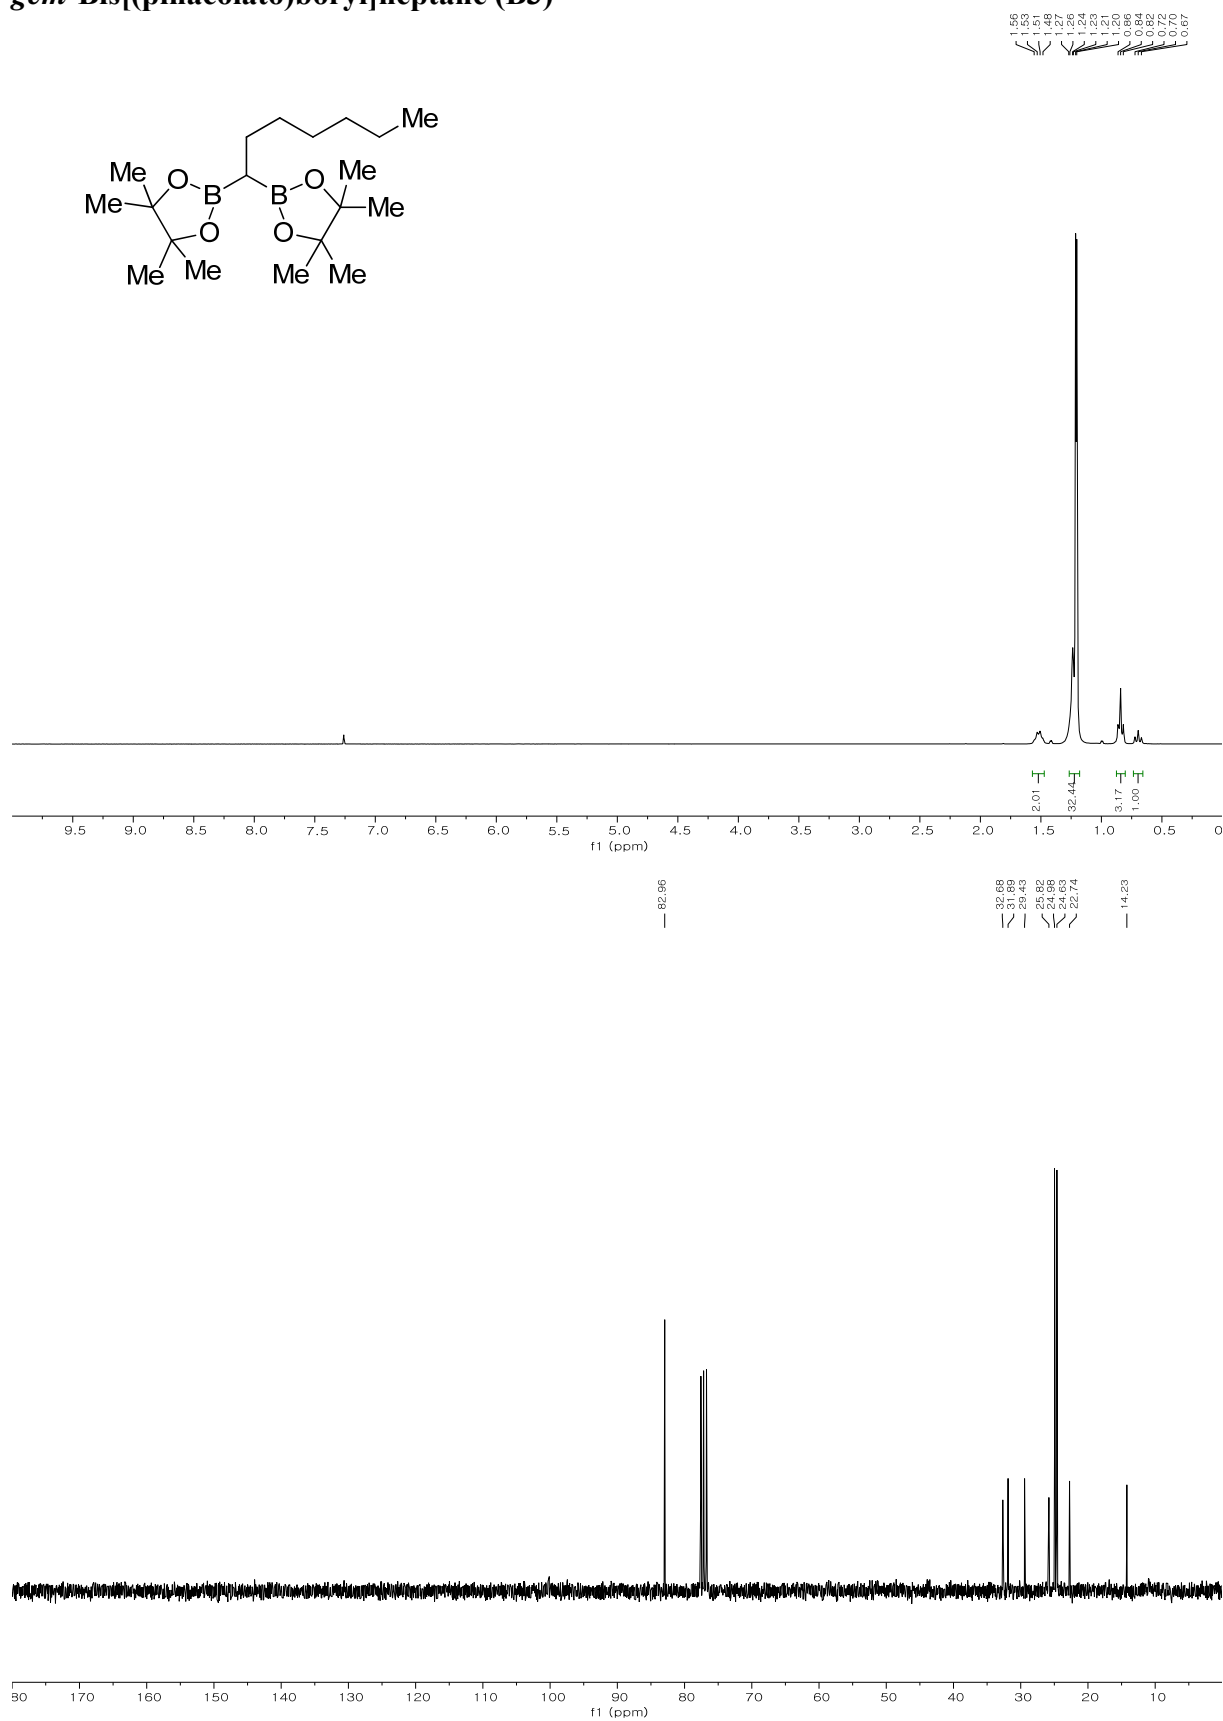

## 2,2-Bis[(pinacolato)boryl]propane (2a)

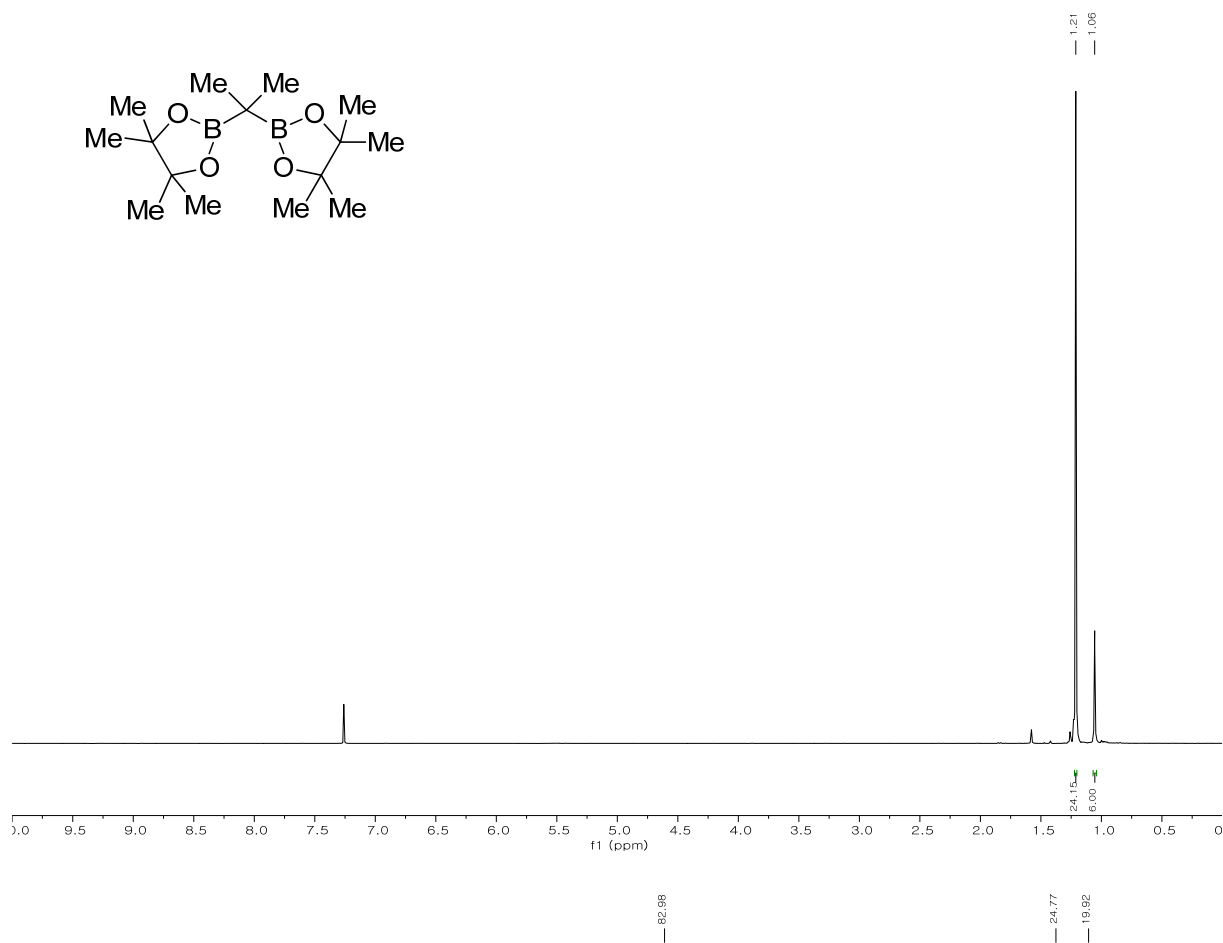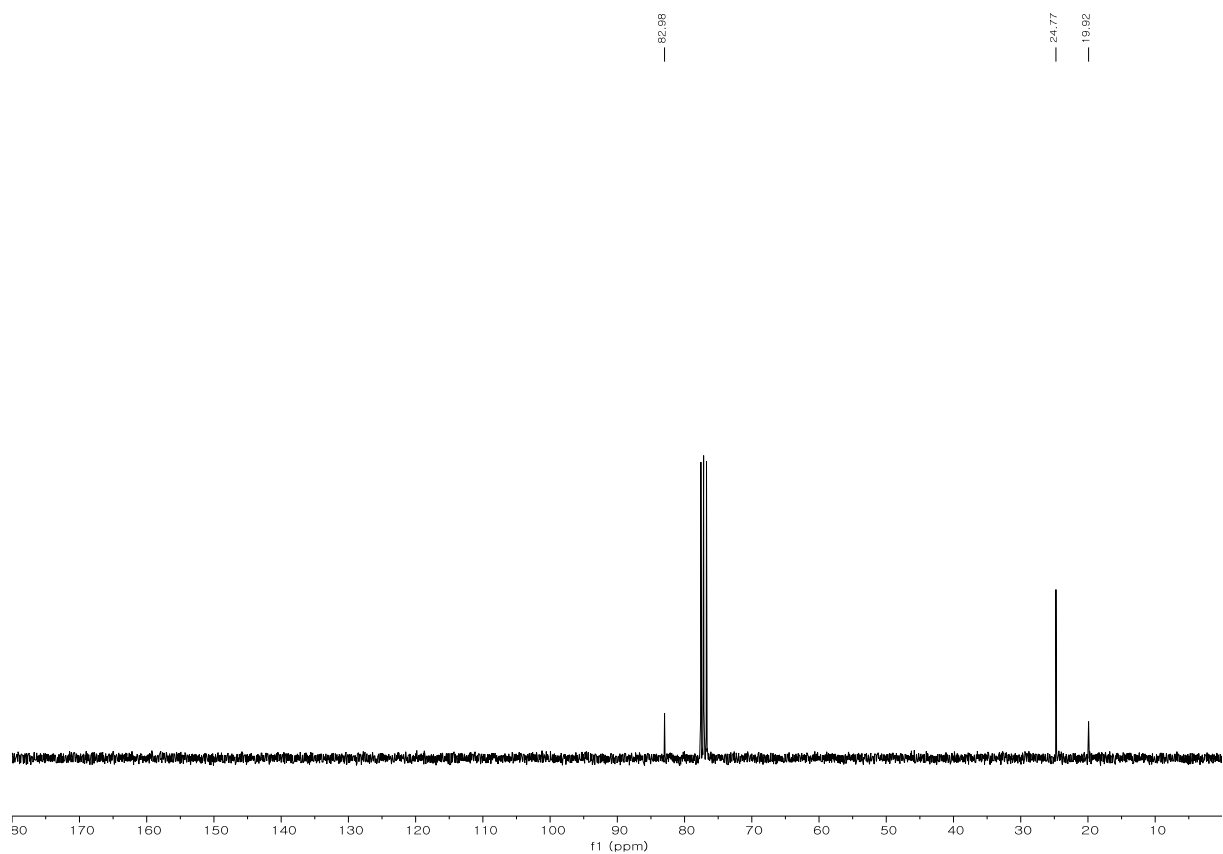

# 2,2-Bis[(pinacolato)boryl]butane (2b)

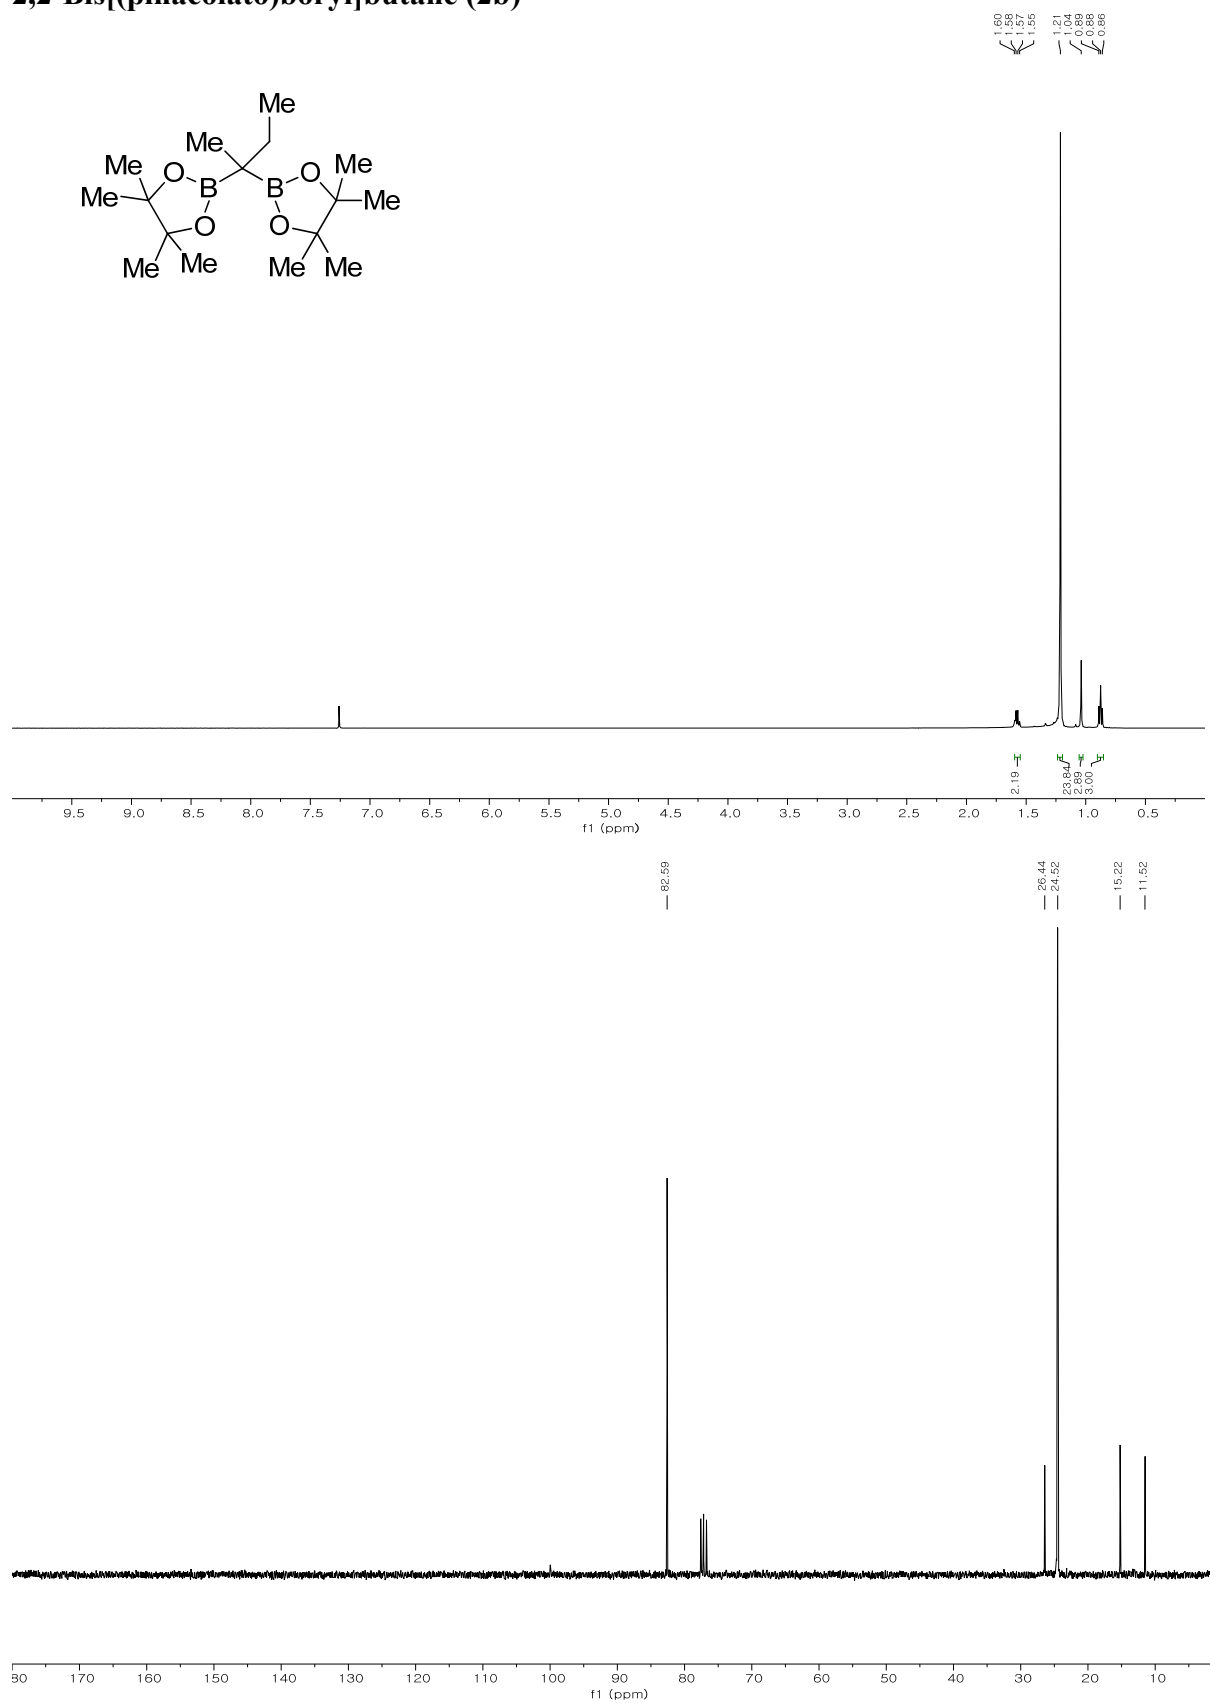



# 2,2-Bis[(pinacolato)boryl]-1-phenylpropane (2c)

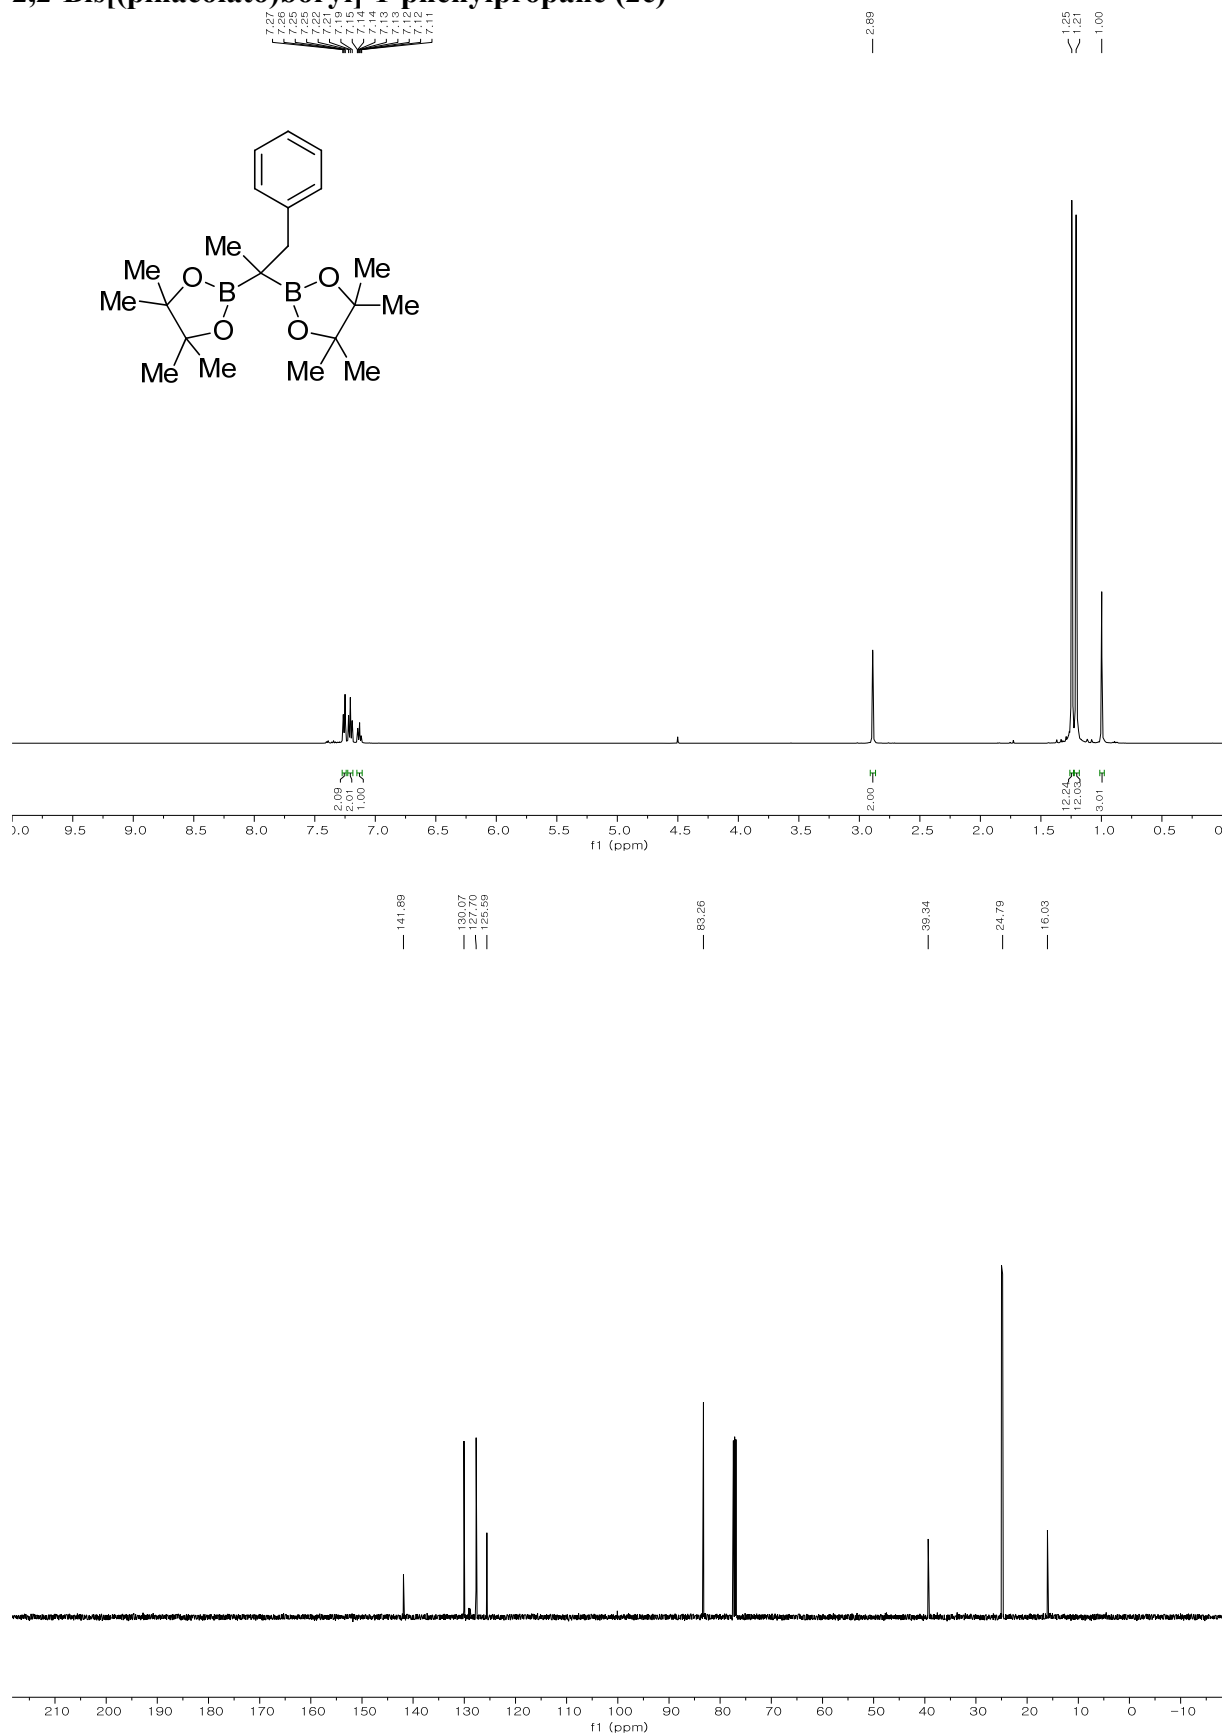

# 2,2-Bis[(pinacolato)boryl]-5-methylhex-4-ene (2d)

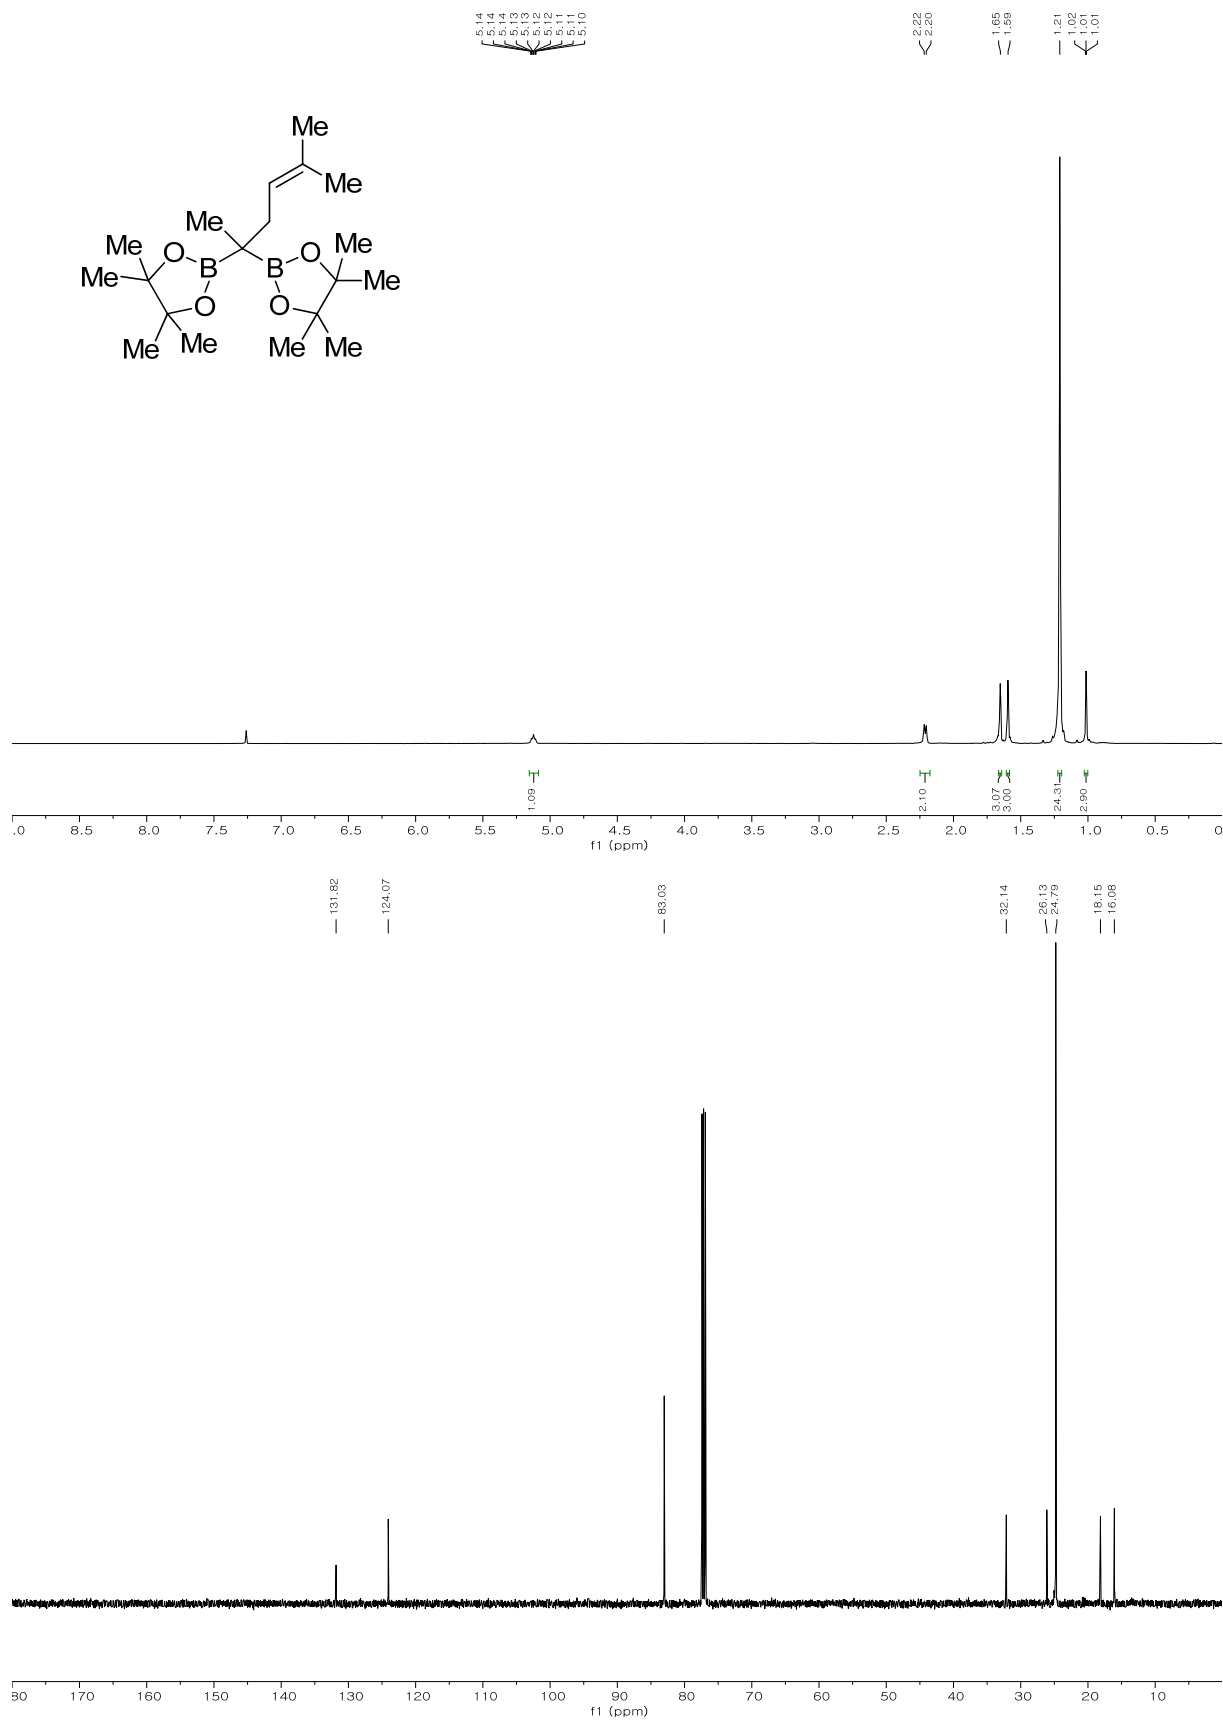

# 4,4-Bis[(pinacolato)boryl]-dec-1-ene (2e)

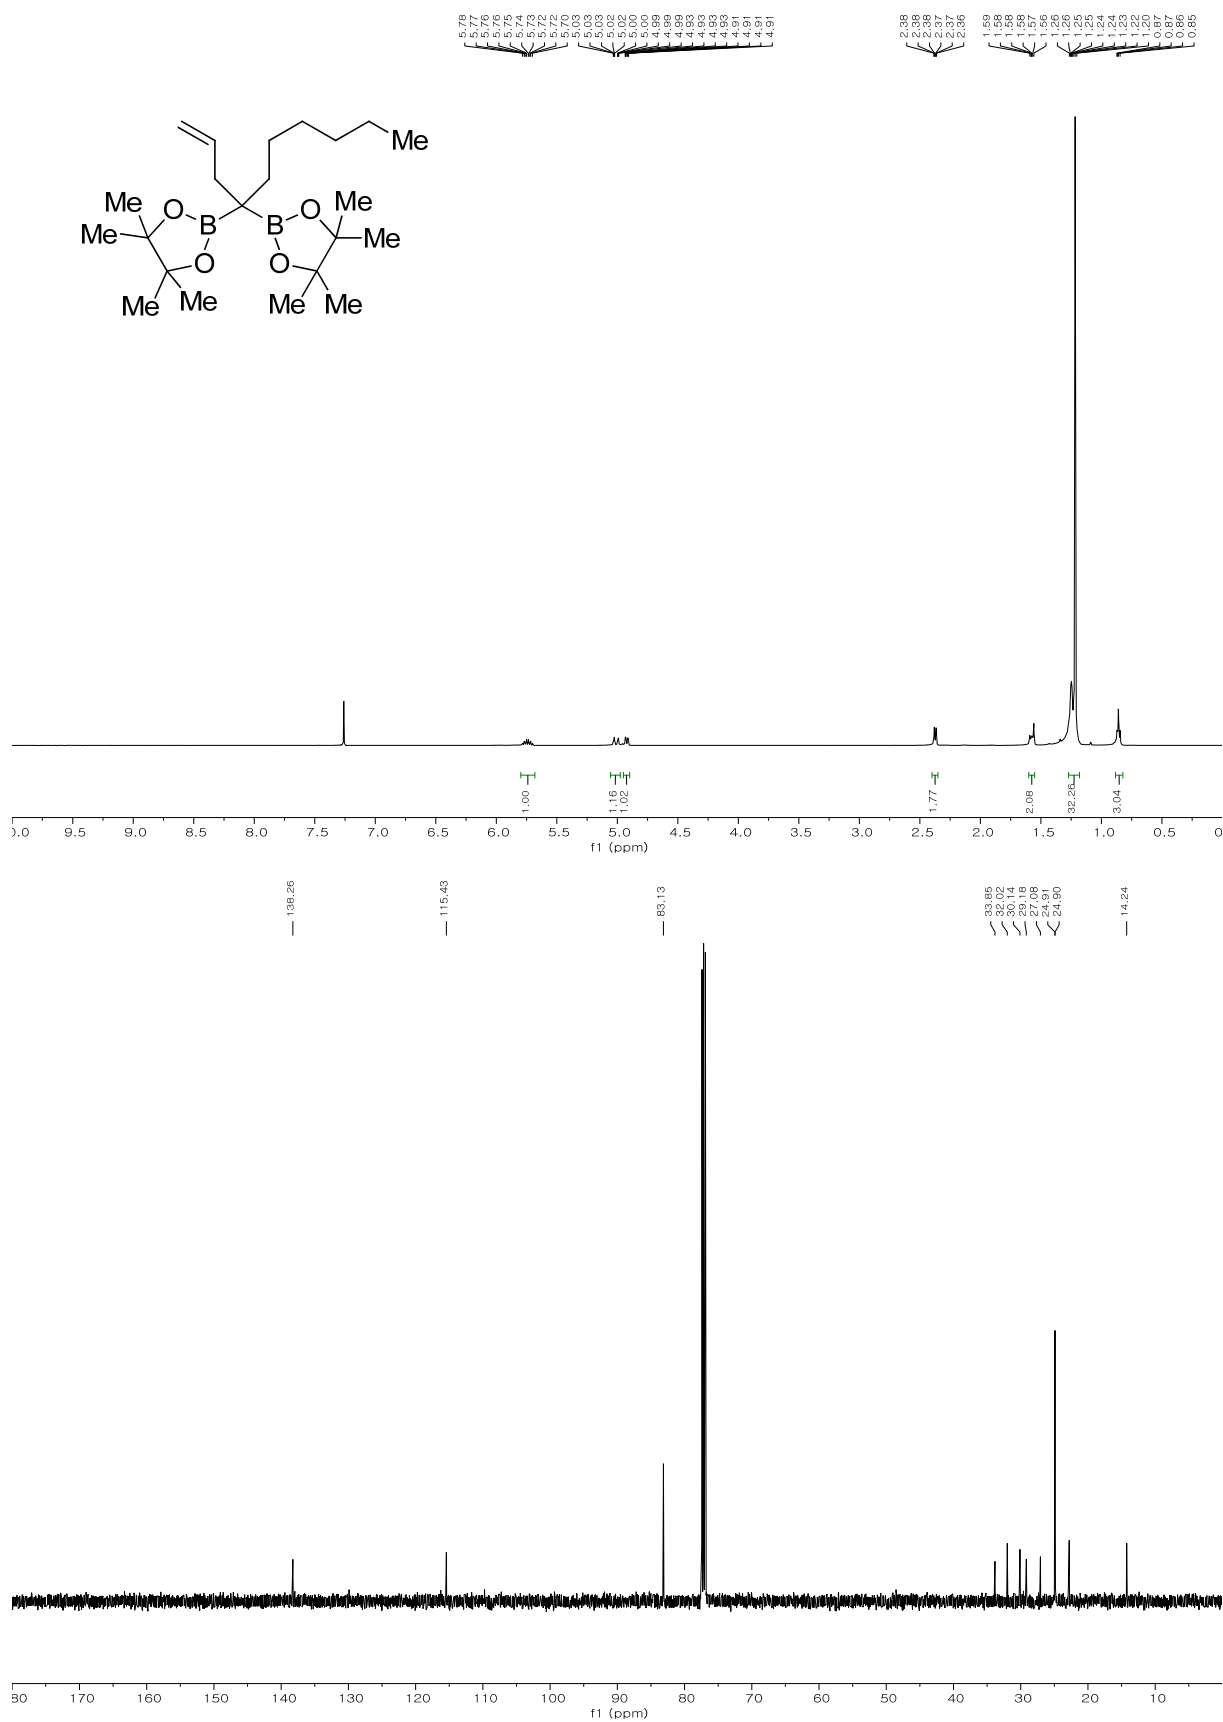

# 4,4-Bis[(pinacolato)boryl]-dec-1-ene (2f)

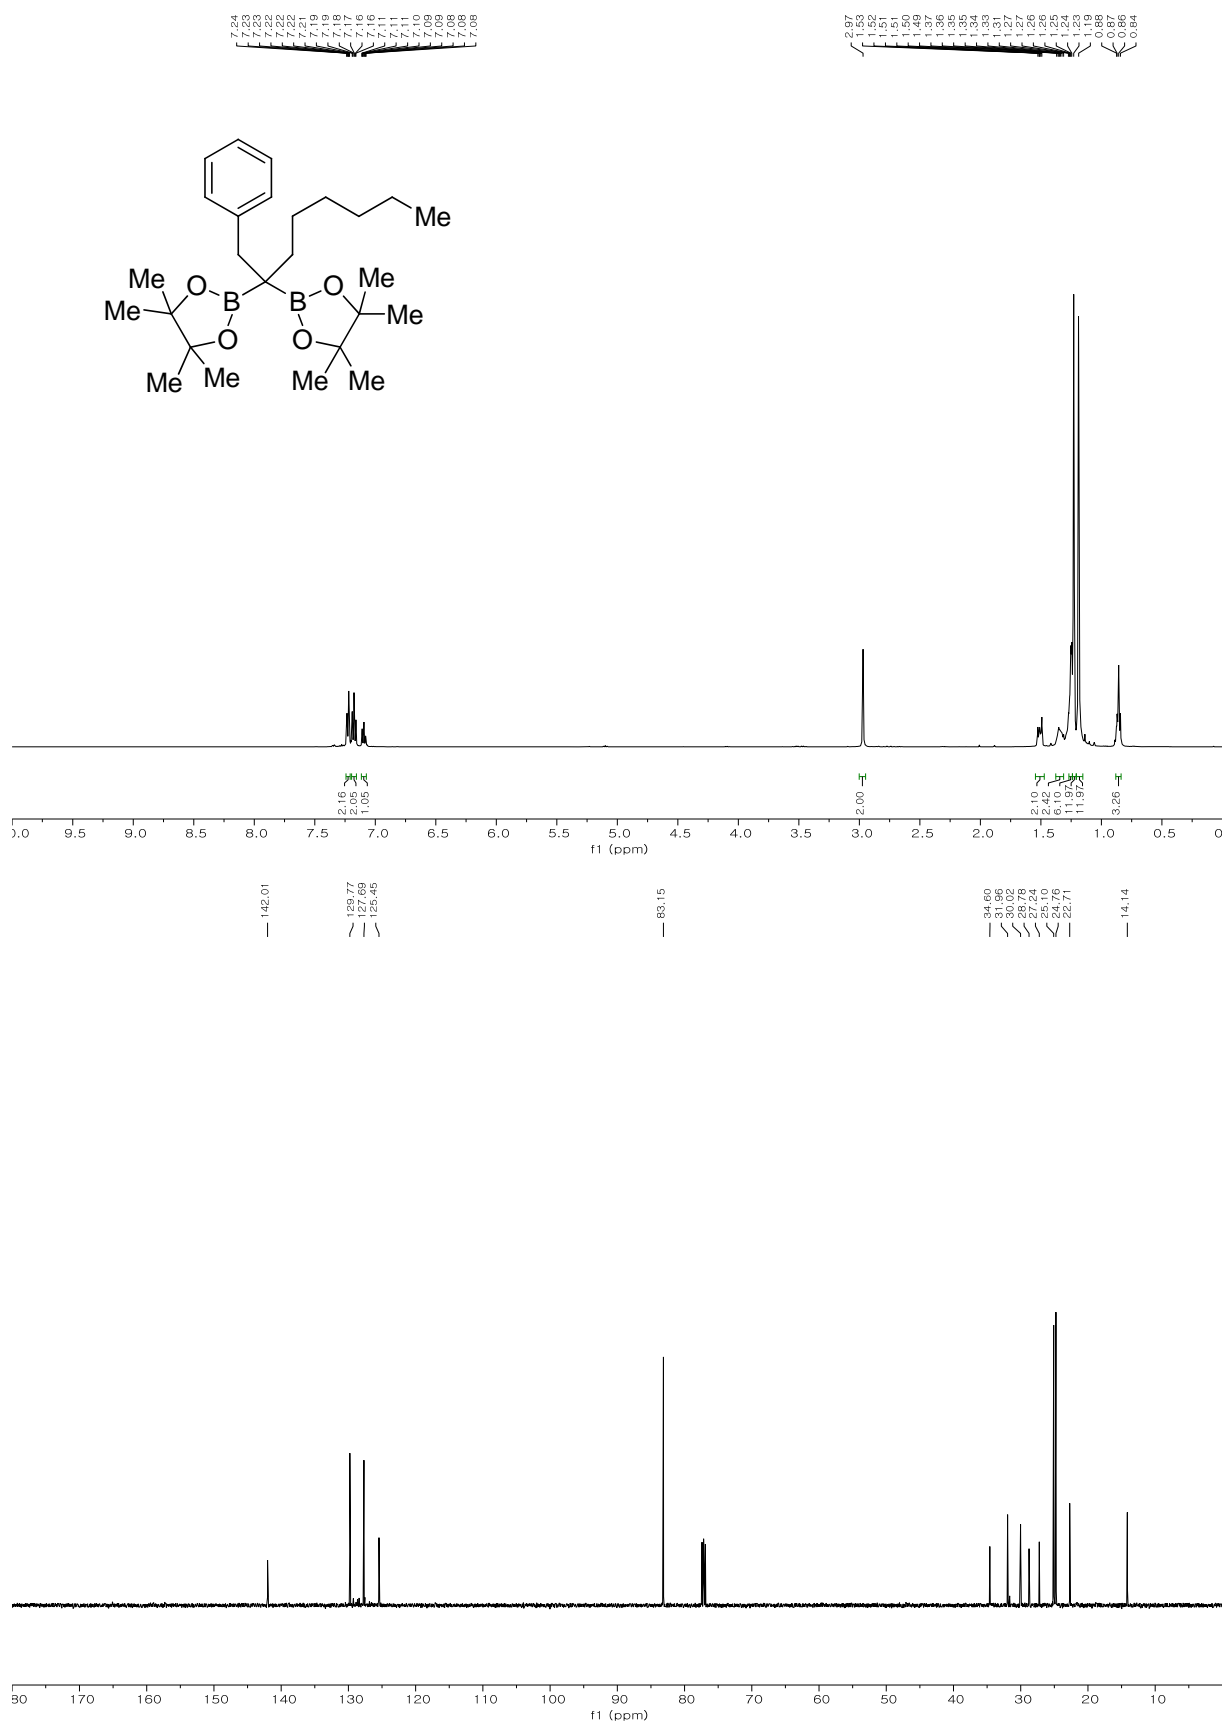

# 2,2-Bis[(pinacolato)boryl]-pent-4-ene (2g)

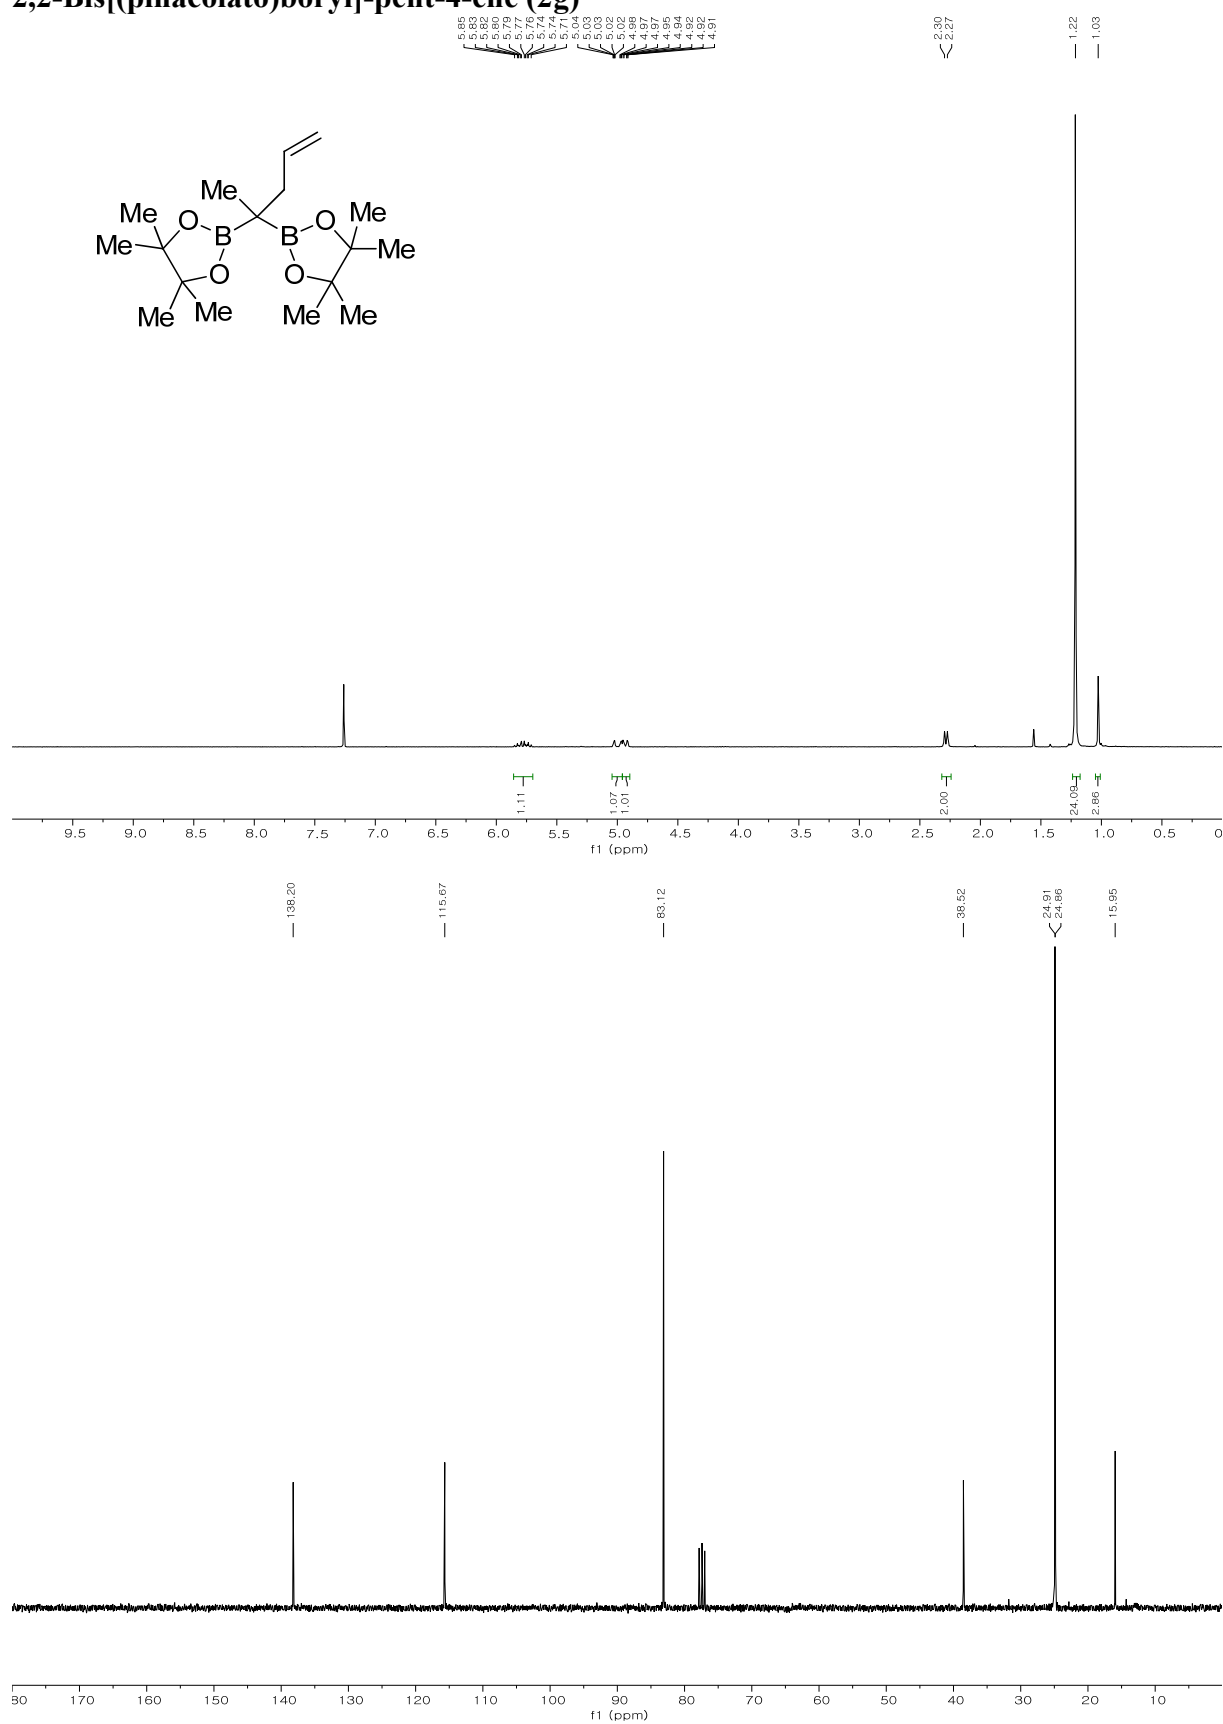

# 2-Isopropylbenzo[h]quinoline (3a)

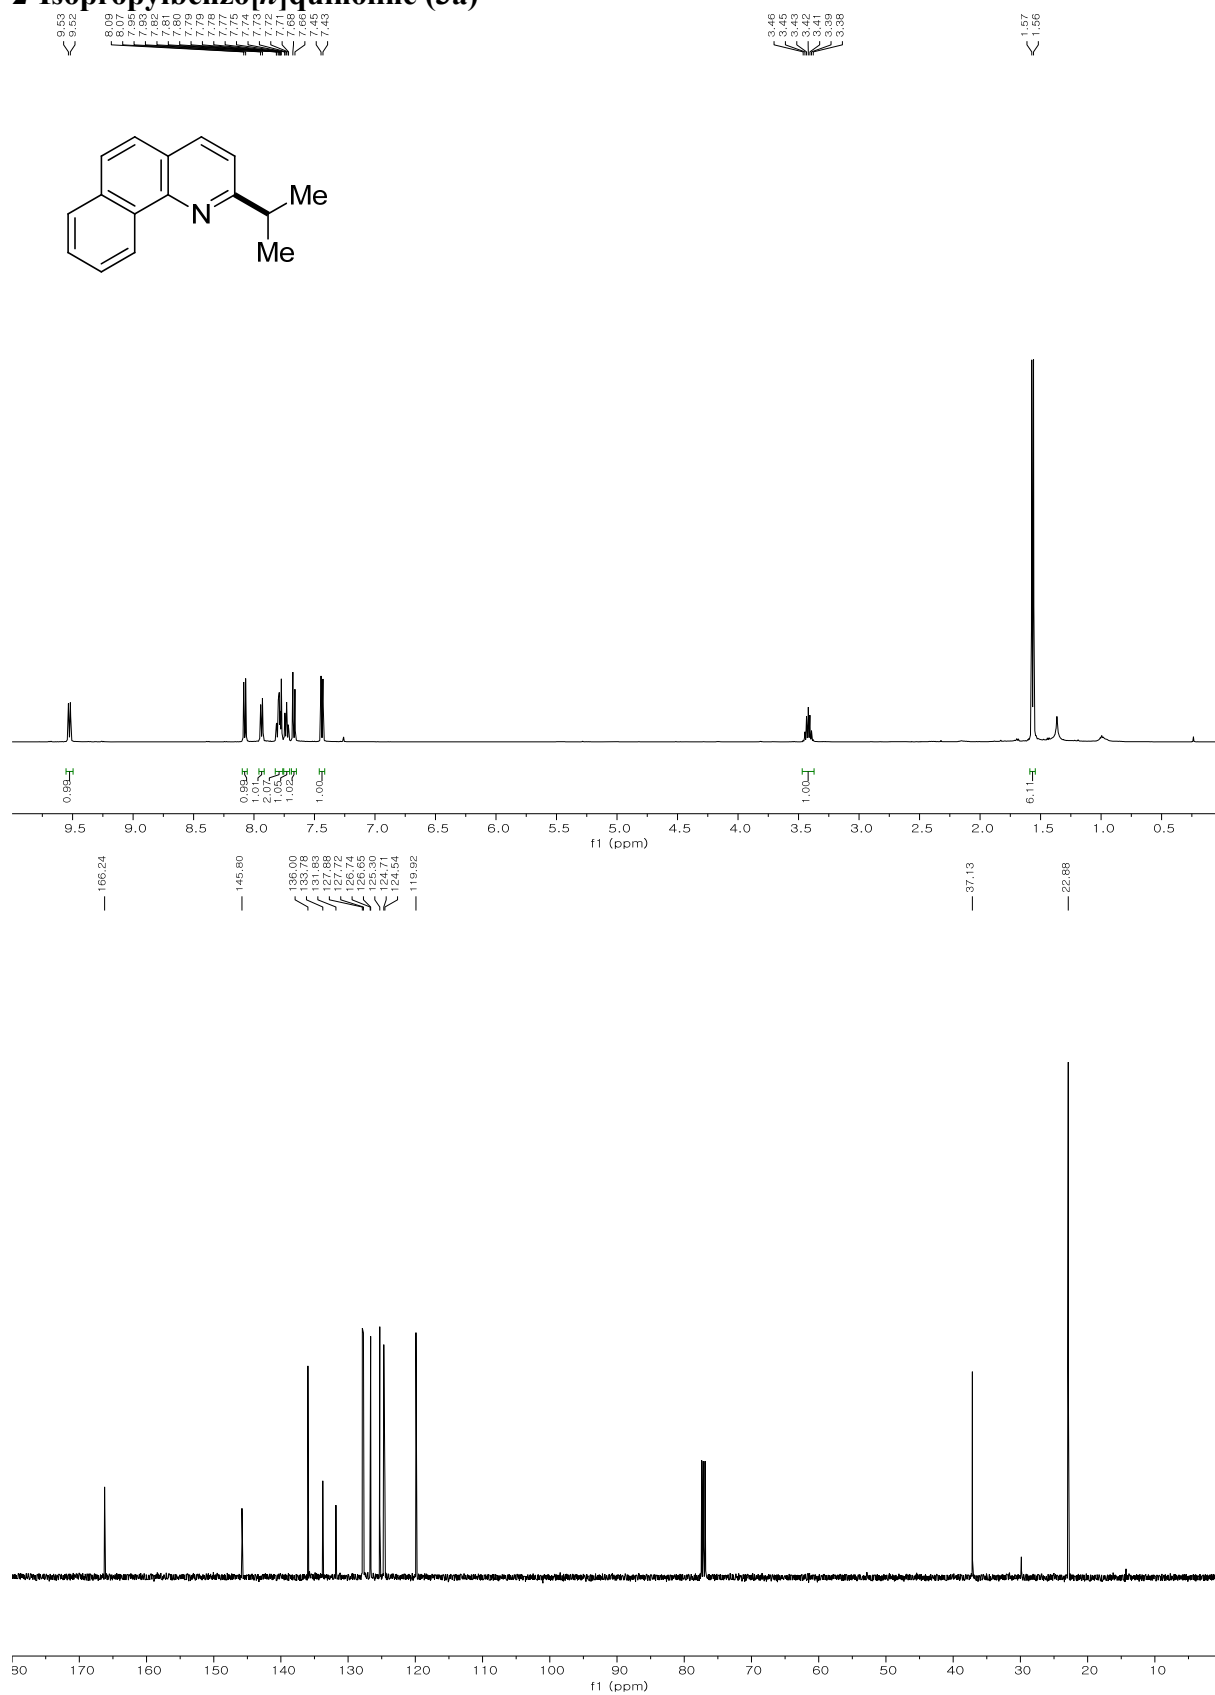

## 2-Isopropylquinoline (3b)

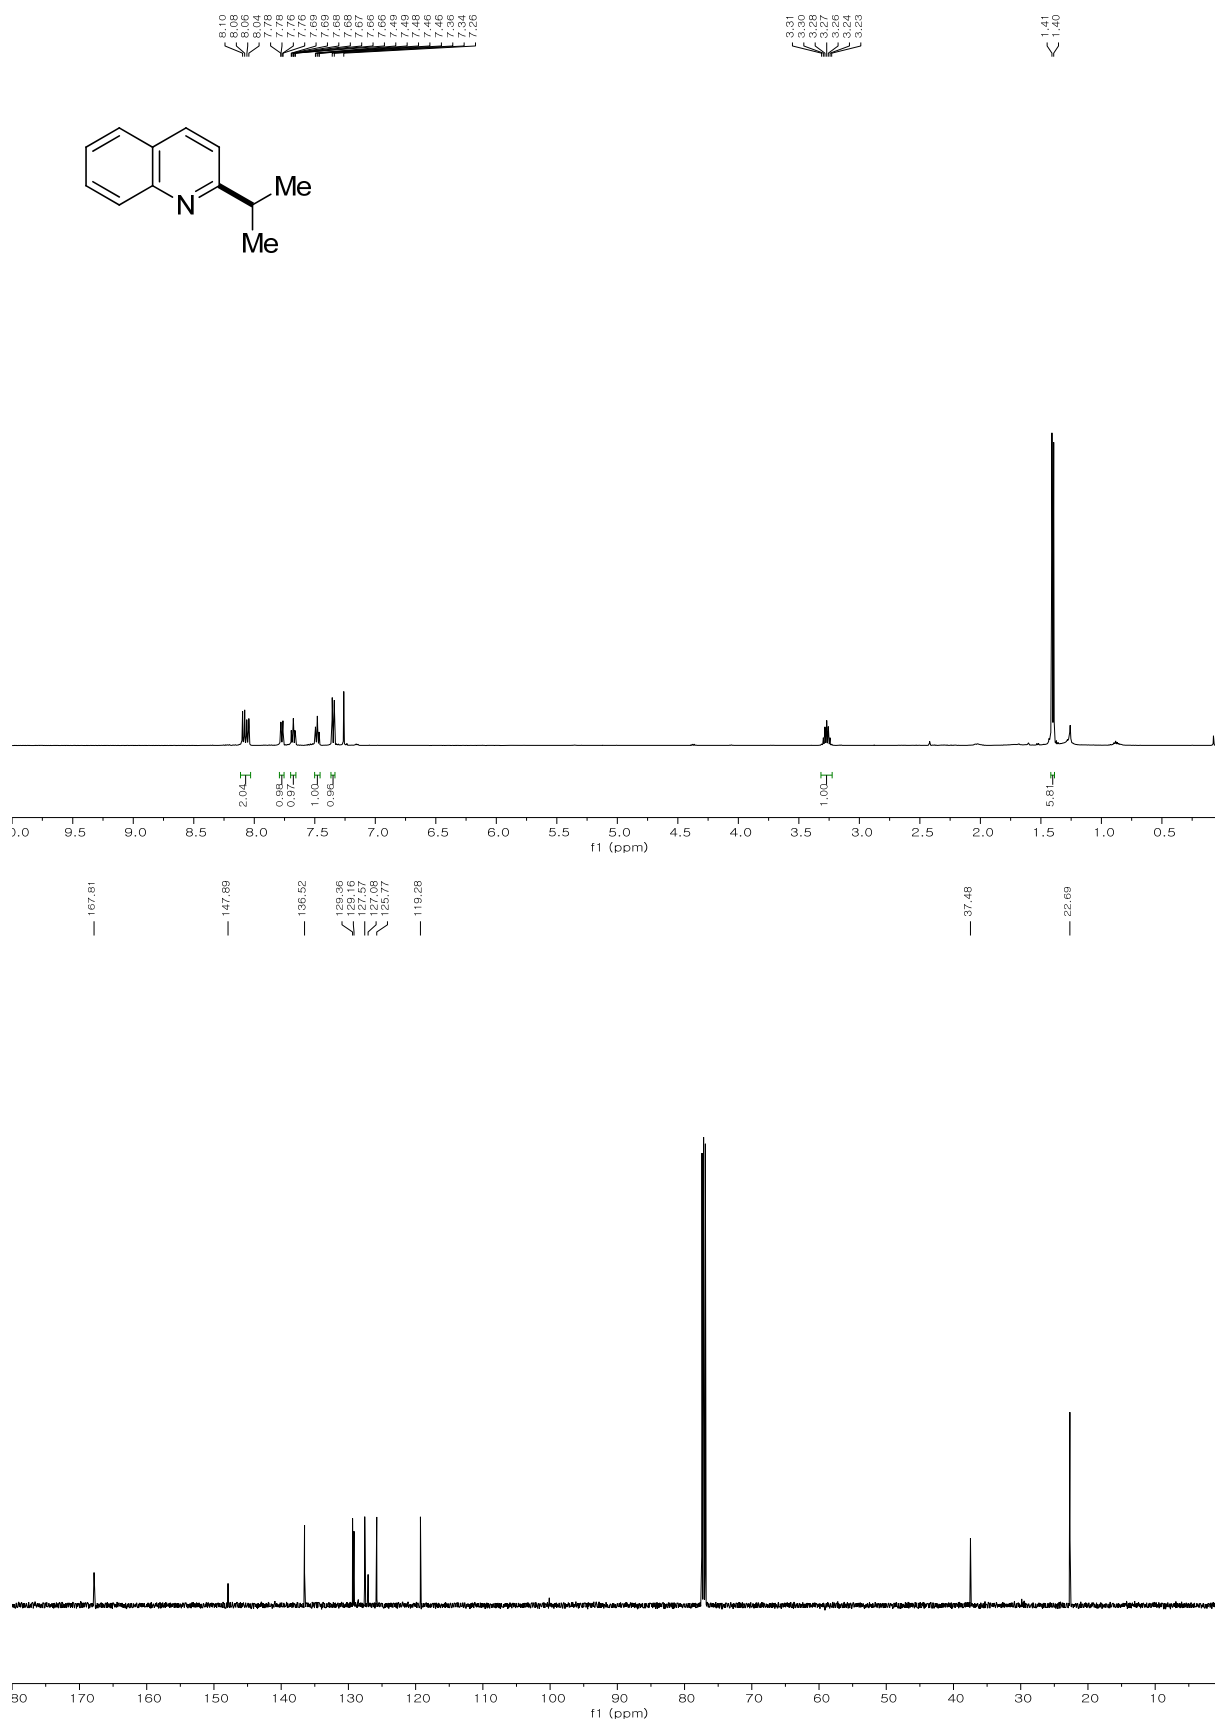

## 2-Isopropyl-6-methoxyquinoline (3c)

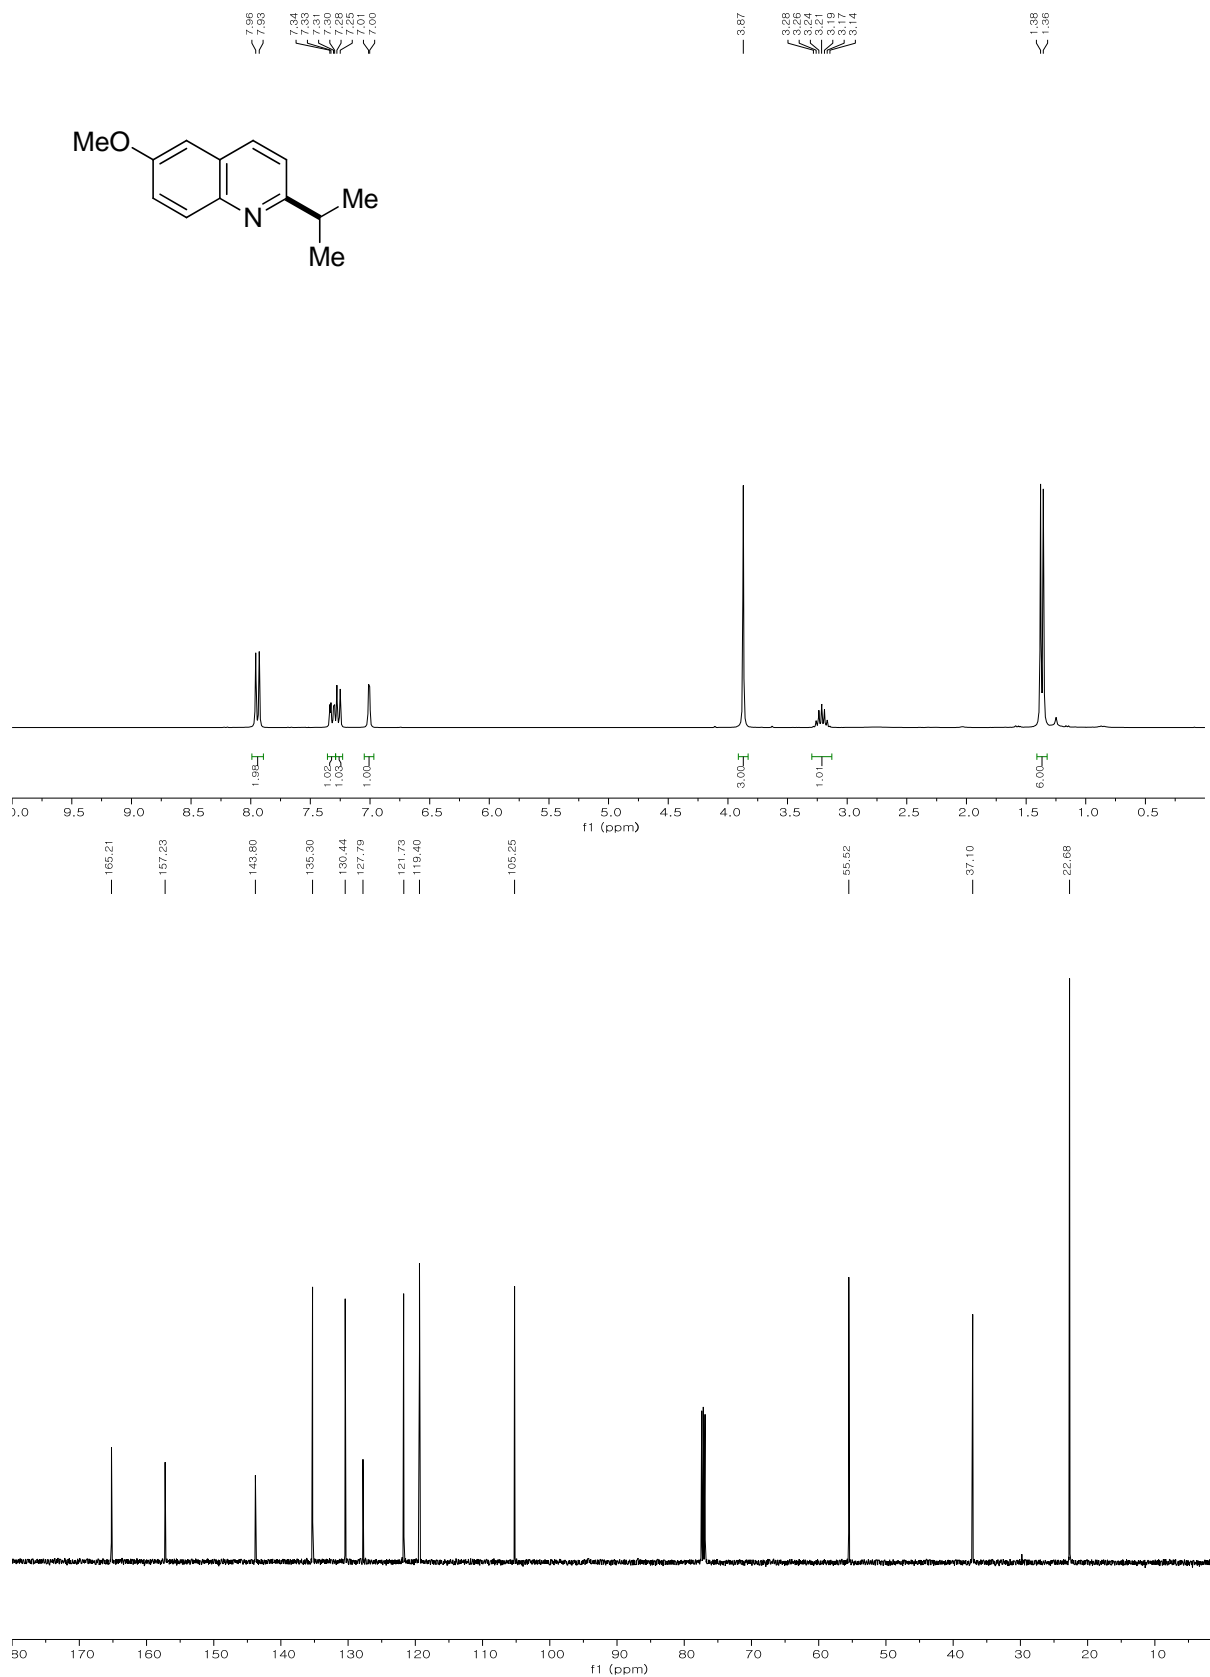



## 2-Isopropyl-6-phenylpyridine (3d)

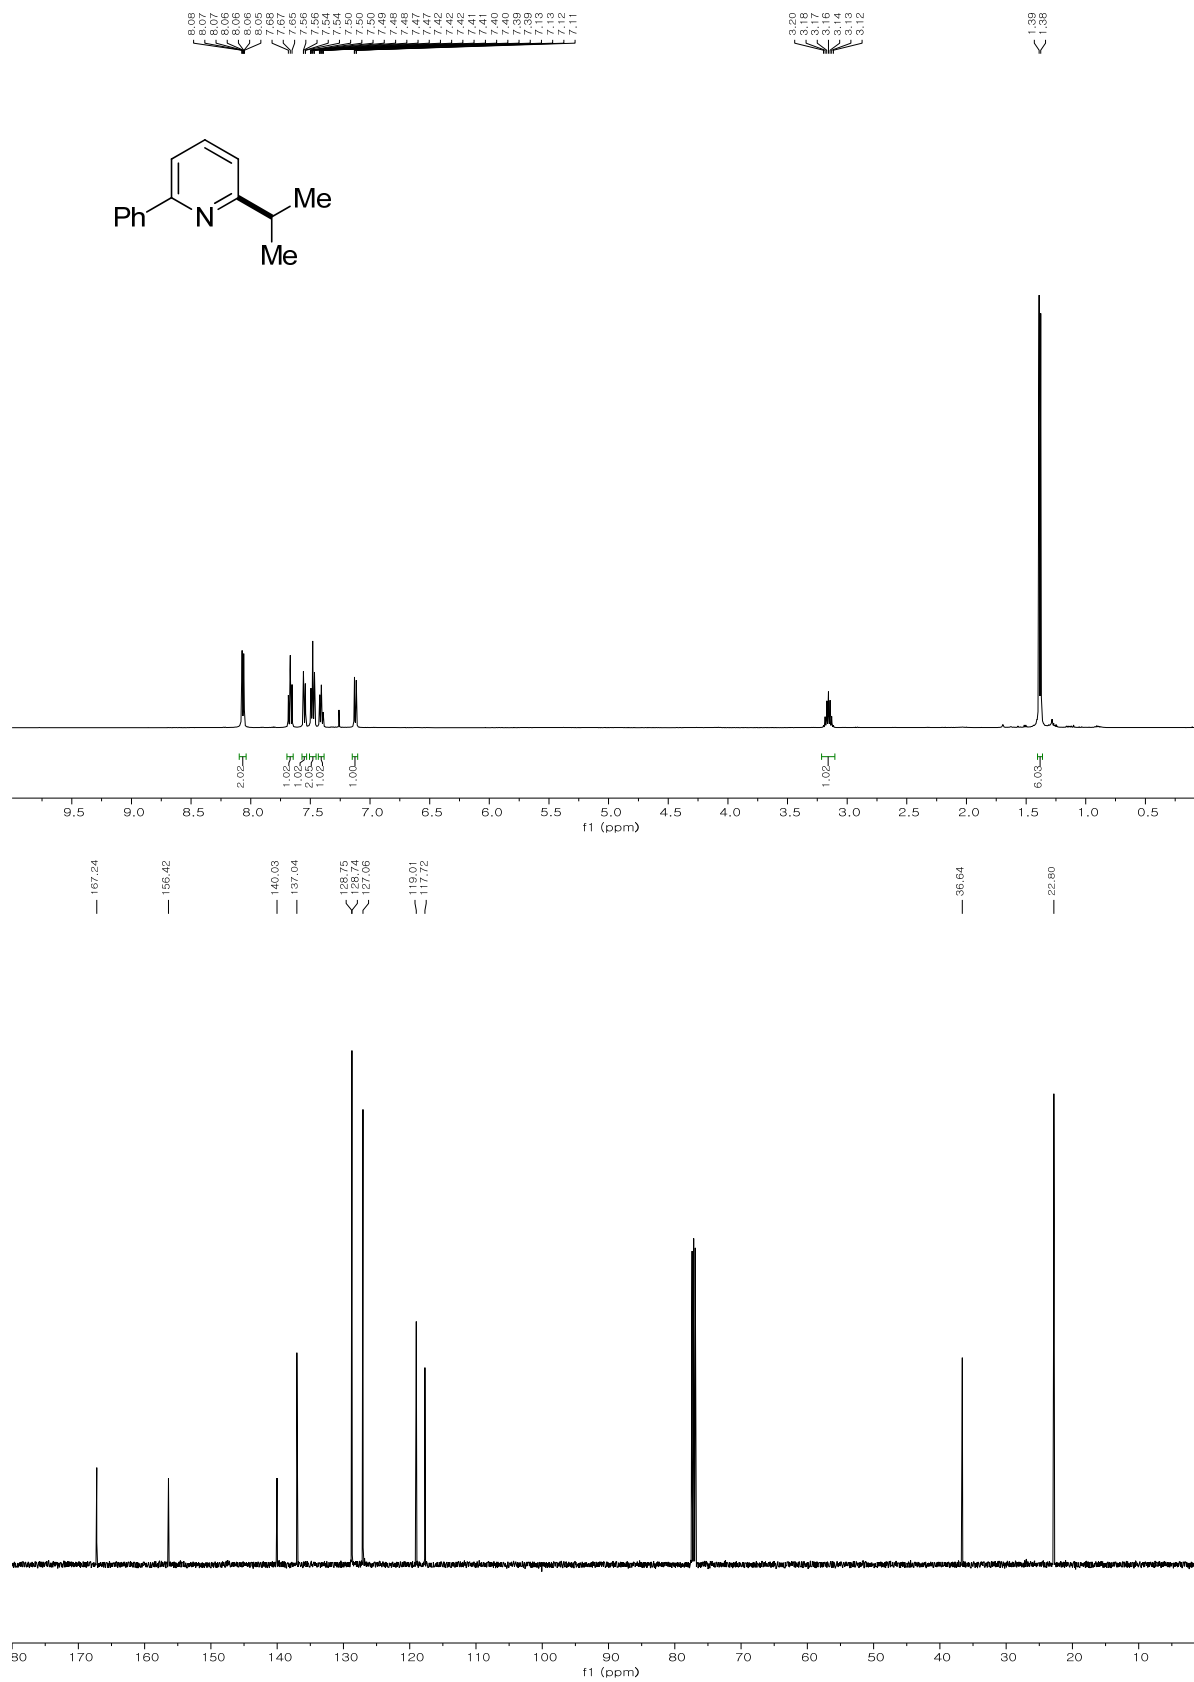

# 2-Isopropyl-6-(*p*-tolyl)pyridine (3e)

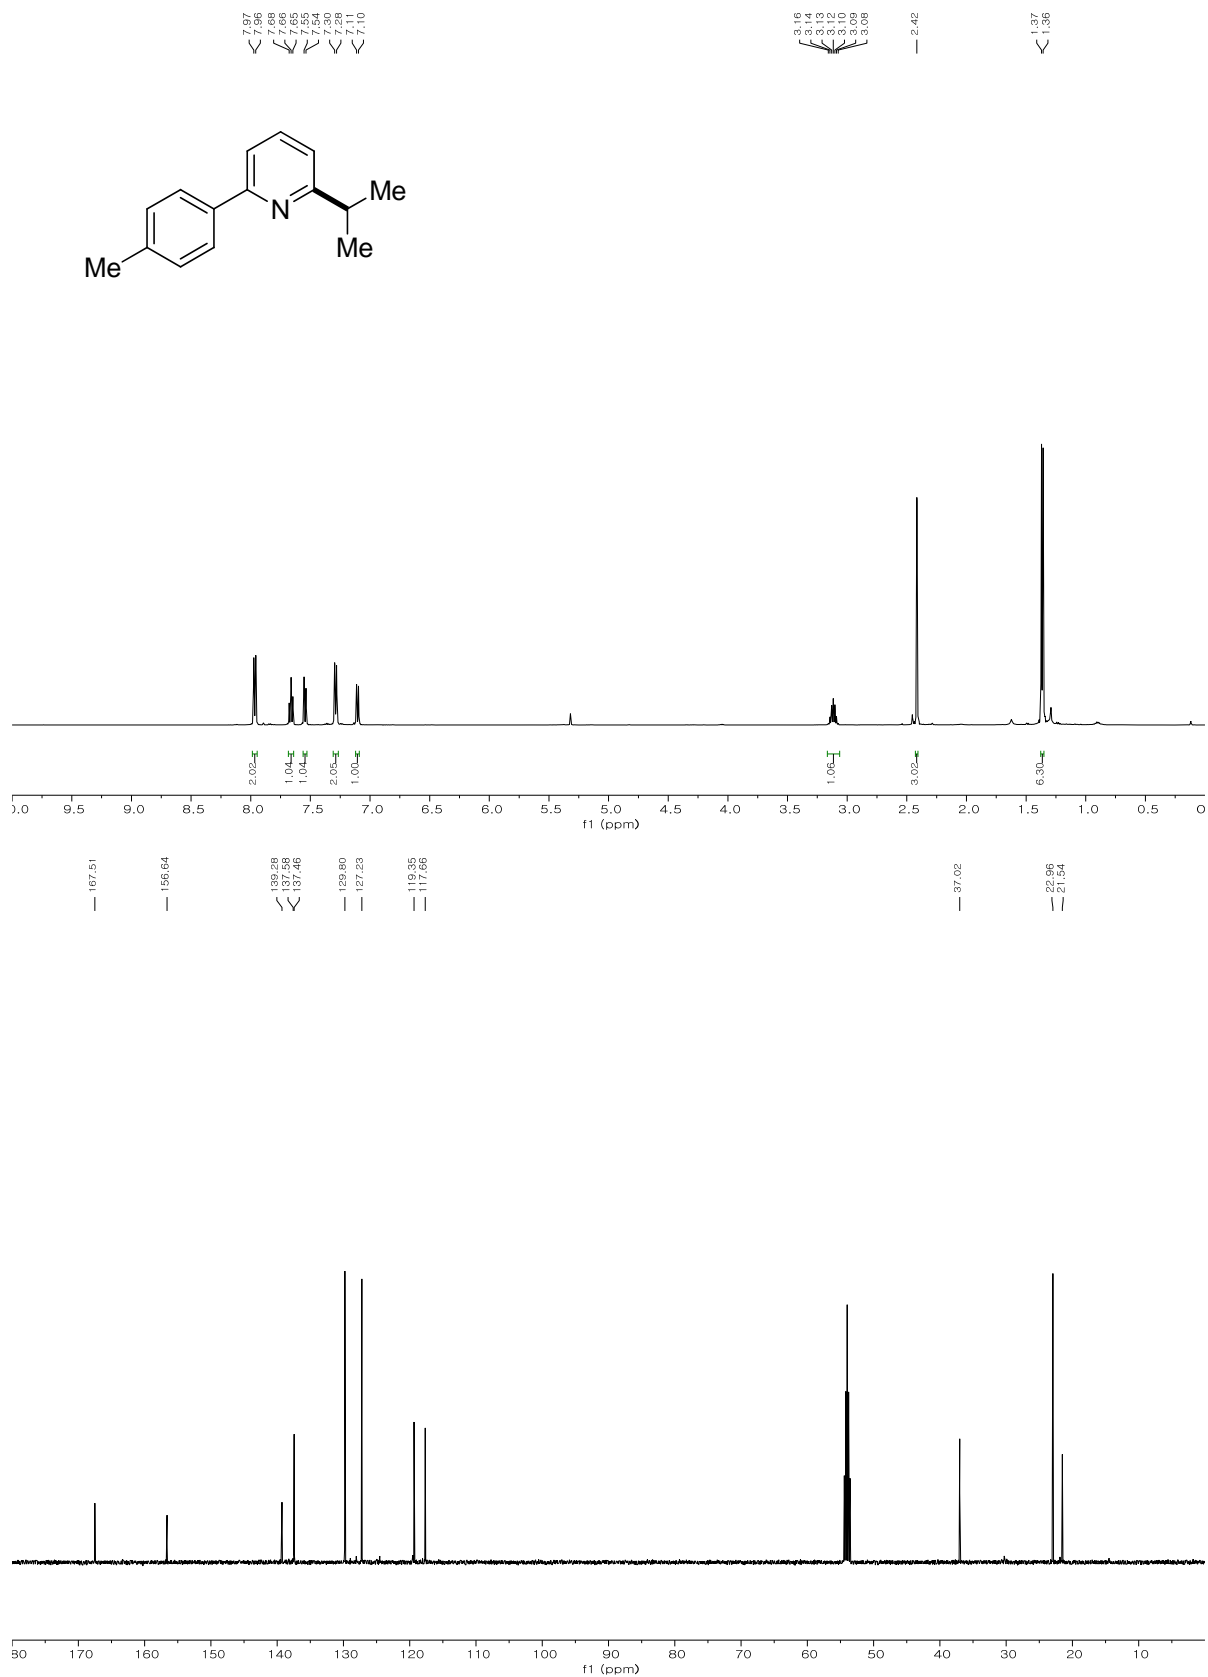

## 2-Isopropyl-6-(4-(trifluoromethyl)phenyl)pyridine (3f)

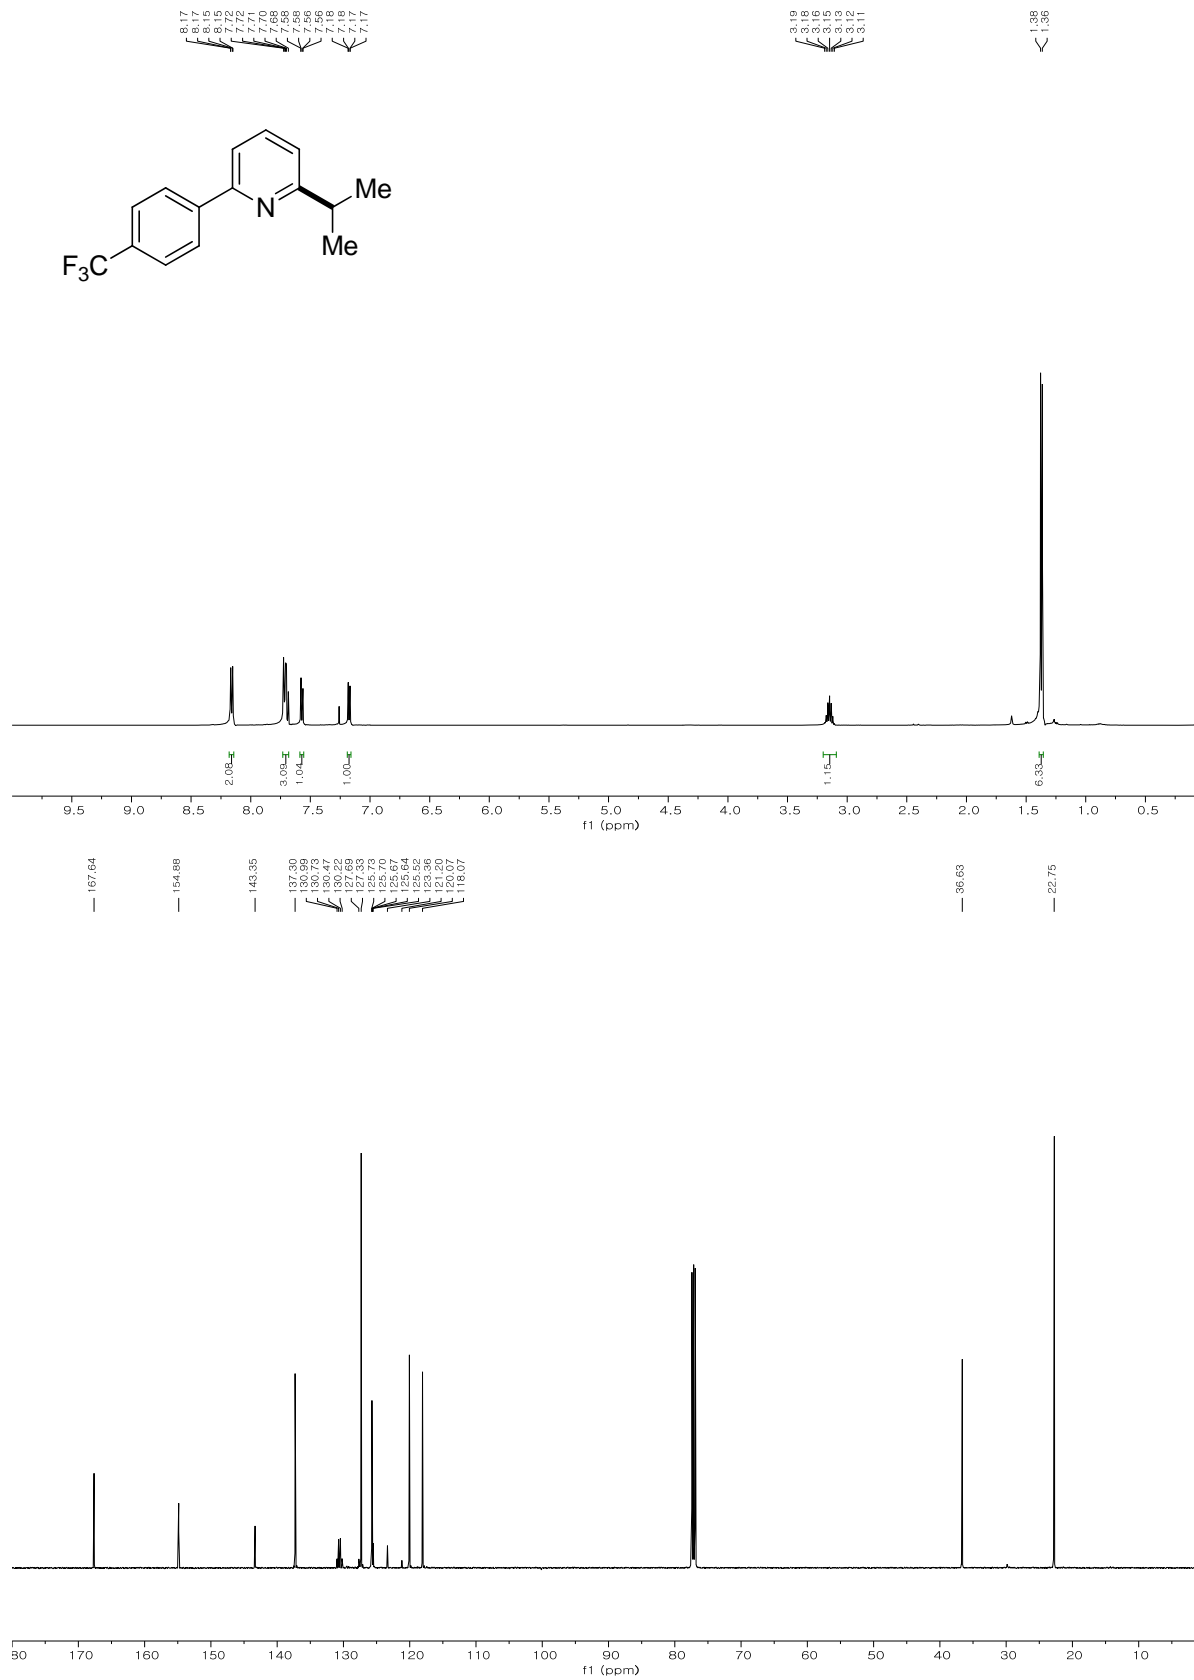

$^{19}\text{F}$  NMR (471 MHz,  $\text{CDCl}_3$ )

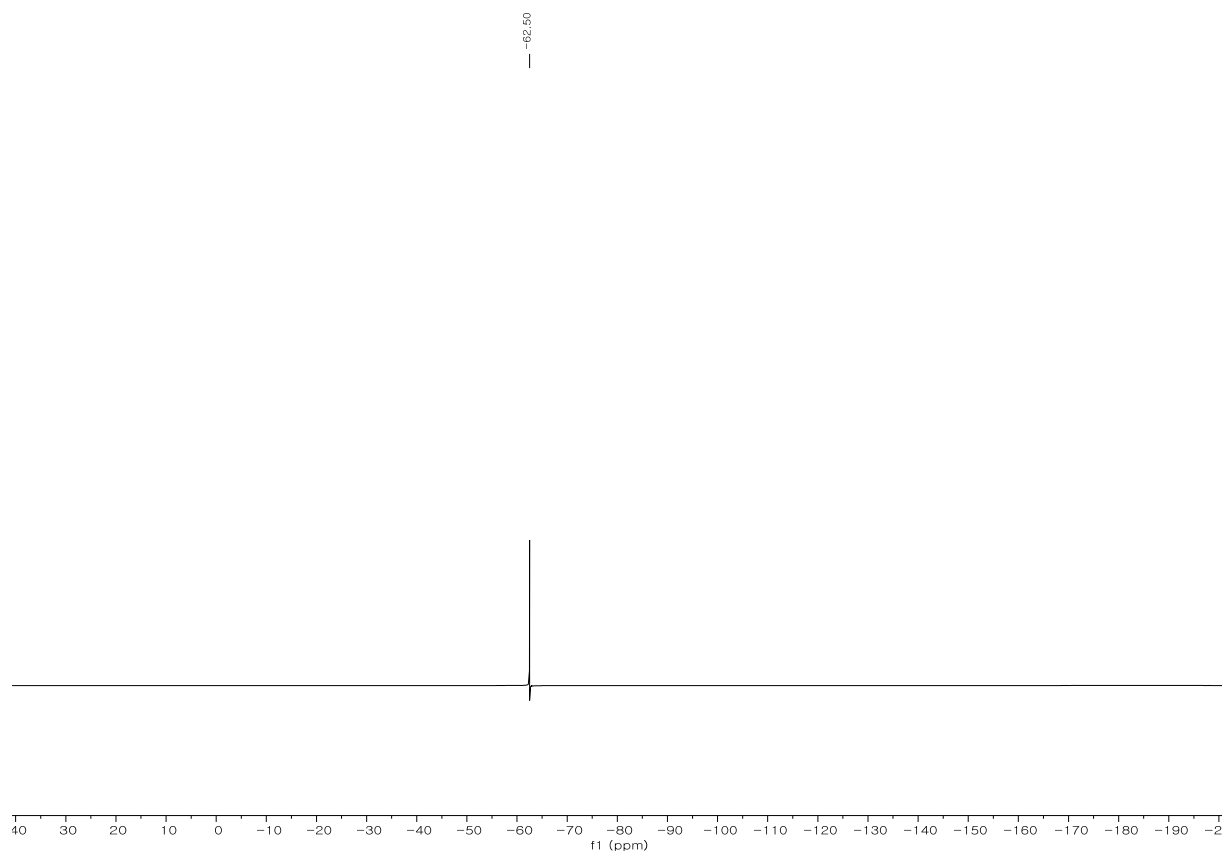

Chemical structure: CC1(C)CCN1c2ccccc3ccccc23

<sup>1</sup>H NMR (400 MHz, CDCl<sub>3</sub>):

- 8.16, 8.15, 8.14, 8.13, 8.12, 8.11, 8.10, 8.09, 8.08, 8.07, 8.06, 8.05, 8.04, 8.03, 8.02, 8.01, 8.00, 7.99, 7.98, 7.97, 7.96, 7.95, 7.94, 7.93, 7.92, 7.91, 7.90, 7.89, 7.88, 7.87, 7.86, 7.85, 7.84, 7.83, 7.82, 7.81, 7.80, 7.79, 7.78, 7.77, 7.76, 7.75, 7.74, 7.73, 7.72, 7.71, 7.70, 7.69, 7.68, 7.67, 7.66, 7.65, 7.64, 7.63, 7.62, 7.61, 7.60, 7.59, 7.58, 7.57, 7.56, 7.55, 7.54, 7.53, 7.52, 7.51, 7.50, 7.49, 7.48, 7.47, 7.46, 7.45, 7.44, 7.43, 7.42, 7.41, 7.40, 7.39, 7.38, 7.37, 7.36, 7.35, 7.34, 7.33, 7.32, 7.31, 7.30, 7.29, 7.28, 7.27, 7.26, 7.25, 7.24, 7.23, 7.22, 7.21, 7.20, 7.19, 7.18, 7.17, 7.16, 7.15, 7.14, 7.13, 7.12, 7.11, 7.10, 7.09, 7.08, 7.07, 7.06, 7.05, 7.04, 7.03, 7.02, 7.01, 7.00, 6.99, 6.98, 6.97, 6.96, 6.95, 6.94, 6.93, 6.92, 6.91, 6.90, 6.89, 6.88, 6.87, 6.86, 6.85, 6.84, 6.83, 6.82, 6.81, 6.80, 6.79, 6.78, 6.77, 6.76, 6.75, 6.74, 6.73, 6.72, 6.71, 6.70, 6.69, 6.68, 6.67, 6.66, 6.65, 6.64, 6.63, 6.62, 6.61, 6.60, 6.59, 6.58, 6.57, 6.56, 6.55, 6.54, 6.53, 6.52, 6.51, 6.50, 6.49, 6.48, 6.47, 6.46, 6.45, 6.44, 6.43, 6.42, 6.41, 6.40, 6.39, 6.38, 6.37, 6.36, 6.35, 6.34, 6.33, 6.32, 6.31, 6.30, 6.29, 6.28, 6.27, 6.26, 6.25, 6.24, 6.23, 6.22, 6.21, 6.20, 6.19, 6.18, 6.17, 6.16, 6.15, 6.14, 6.13, 6.12, 6.11, 6.10, 6.09, 6.08, 6.07, 6.06, 6.05, 6.04, 6.03, 6.02, 6.01, 6.00, 5.99, 5.98, 5.97, 5.96, 5.95, 5.94, 5.93, 5.92, 5.91, 5.90, 5.89, 5.88, 5.87, 5.86, 5.85, 5.84, 5.83, 5.82, 5.81, 5.80, 5.79, 5.78, 5.77, 5.76, 5.75, 5.74, 5.73, 5.72, 5.71, 5.70, 5.69, 5.68, 5.67, 5.66, 5.65, 5.64, 5.63, 5.62, 5.61, 5.60, 5.59, 5.58, 5.57, 5.56, 5.55, 5.54, 5.53, 5.52, 5.51, 5.50, 5.49, 5.48, 5.47, 5.46, 5.45, 5.44, 5.43, 5.42, 5.41, 5.40, 5.39, 5.38, 5.37, 5.36, 5.35, 5.34, 5.33, 5.32, 5.31, 5.30, 5.29, 5.28, 5.27, 5.26, 5.25, 5.24, 5.23, 5.22, 5.21, 5.20, 5.19, 5.18, 5.17, 5.16, 5.15, 5.14, 5.13, 5.12, 5.11, 5.10, 5.09, 5.08, 5.07, 5.06, 5.05, 5.04, 5.03, 5.02, 5.01, 5.00, 4.99, 4.98, 4.97, 4.96, 4.95, 4.94, 4.93, 4.92, 4.91, 4.90, 4.89, 4.88, 4.87, 4.86, 4.85, 4.84, 4.83, 4.82, 4.81, 4.80, 4.79, 4.78, 4.77, 4.76, 4.75, 4.74, 4.73, 4.72, 4.71, 4.70, 4.69, 4.68, 4.67, 4.66, 4.65, 4.64, 4.63, 4.62, 4.61, 4.60, 4.59, 4.58, 4.57, 4.56, 4.55, 4.54, 4.53, 4.52, 4.51, 4.50, 4.49, 4.48, 4.47, 4.46, 4.45, 4.44, 4.43, 4.42, 4.41, 4.40, 4.39, 4.38, 4.37, 4.36, 4.35, 4.34, 4.33, 4.32, 4.31, 4.30, 4.29, 4.28, 4.27, 4.26, 4.25, 4.24, 4.23, 4.22, 4.21, 4.20, 4.19, 4.18, 4.17, 4.16, 4.15, 4.14, 4.13, 4.12, 4.11, 4.10, 4.09, 4.08, 4.07, 4.06, 4.05, 4.04, 4.03, 4.02, 4.01, 4.00, 3.99, 3.98, 3.97, 3.96, 3.95, 3.94, 3.93, 3.92, 3.91, 3.90, 3.89, 3.88, 3.87, 3.86, 3.85, 3.84, 3.83, 3.82, 3.81, 3.80, 3.79, 3.78, 3.77, 3.76, 3.75, 3.74, 3.73, 3.72, 3.71, 3.70, 3.69, 3.68, 3.67, 3.66, 3.65, 3.64, 3.63, 3.62, 3.61, 3.60, 3.59, 3.58, 3.57, 3.56, 3.55, 3.54, 3.53, 3.52, 3.51, 3.50, 3.49, 3.48, 3.47, 3.46, 3.45, 3.44, 3.43, 3.42, 3.41, 3.40, 3.39, 3.38, 3.37, 3.36, 3.35, 3.34, 3.33, 3.32, 3.31, 3.30, 3.29, 3.28, 3.27, 3.26, 3.25, 3.24, 3.23, 3.22, 3.21, 3.20, 3.19, 3.18, 3.17, 3.16, 3.15, 3.14, 3.13, 3.12, 3.11, 3.10, 3.09, 3.08, 3.07, 3.06, 3.05, 3.04, 3.03, 3.02, 3.01, 3.00, 2.99, 2.98, 2.97, 2.96, 2.95, 2.94, 2.93, 2.92, 2.91, 2.90, 2.89, 2.88, 2.87, 2.86, 2.85, 2.84, 2.83, 2.82, 2.81, 2.80, 2.79, 2.78, 2.77, 2.76, 2.75, 2.74, 2.73, 2.72, 2.71, 2.70, 2.69, 2.68, 2.67, 2.66, 2.65, 2.64, 2.63, 2.62, 2.61, 2.60, 2.59, 2.58, 2.57, 2.56, 2.55, 2.54, 2.53, 2.52, 2.51, 2.50, 2.49, 2.48, 2.47, 2.46, 2.45, 2.44, 2.43, 2.42, 2.41, 2.40, 2.39, 2.38, 2.37, 2.36, 2.35, 2.34, 2.33, 2.32, 2.31, 2.30, 2.29, 2.28, 2.27, 2.26, 2.25, 2.24, 2.23, 2.22, 2.21, 2.20, 2.19, 2.18, 2.17, 2.16, 2.15, 2.14, 2.13, 2.12, 2.11, 2.10, 2.09, 2.08, 2.07, 2.06, 2.05, 2.04, 2.03, 2.02, 2.01, 2.00, 1.99, 1.98, 1.97, 1.96, 1.95, 1.94, 1.93, 1.92, 1.91, 1.90, 1.89, 1.88, 1.87, 1.86, 1.85, 1.84, 1.83, 1.82, 1.81, 1.80, 1.79, 1.78, 1.77, 1.7

## 2-Isopropyl-4-phenylpyridine (3h)

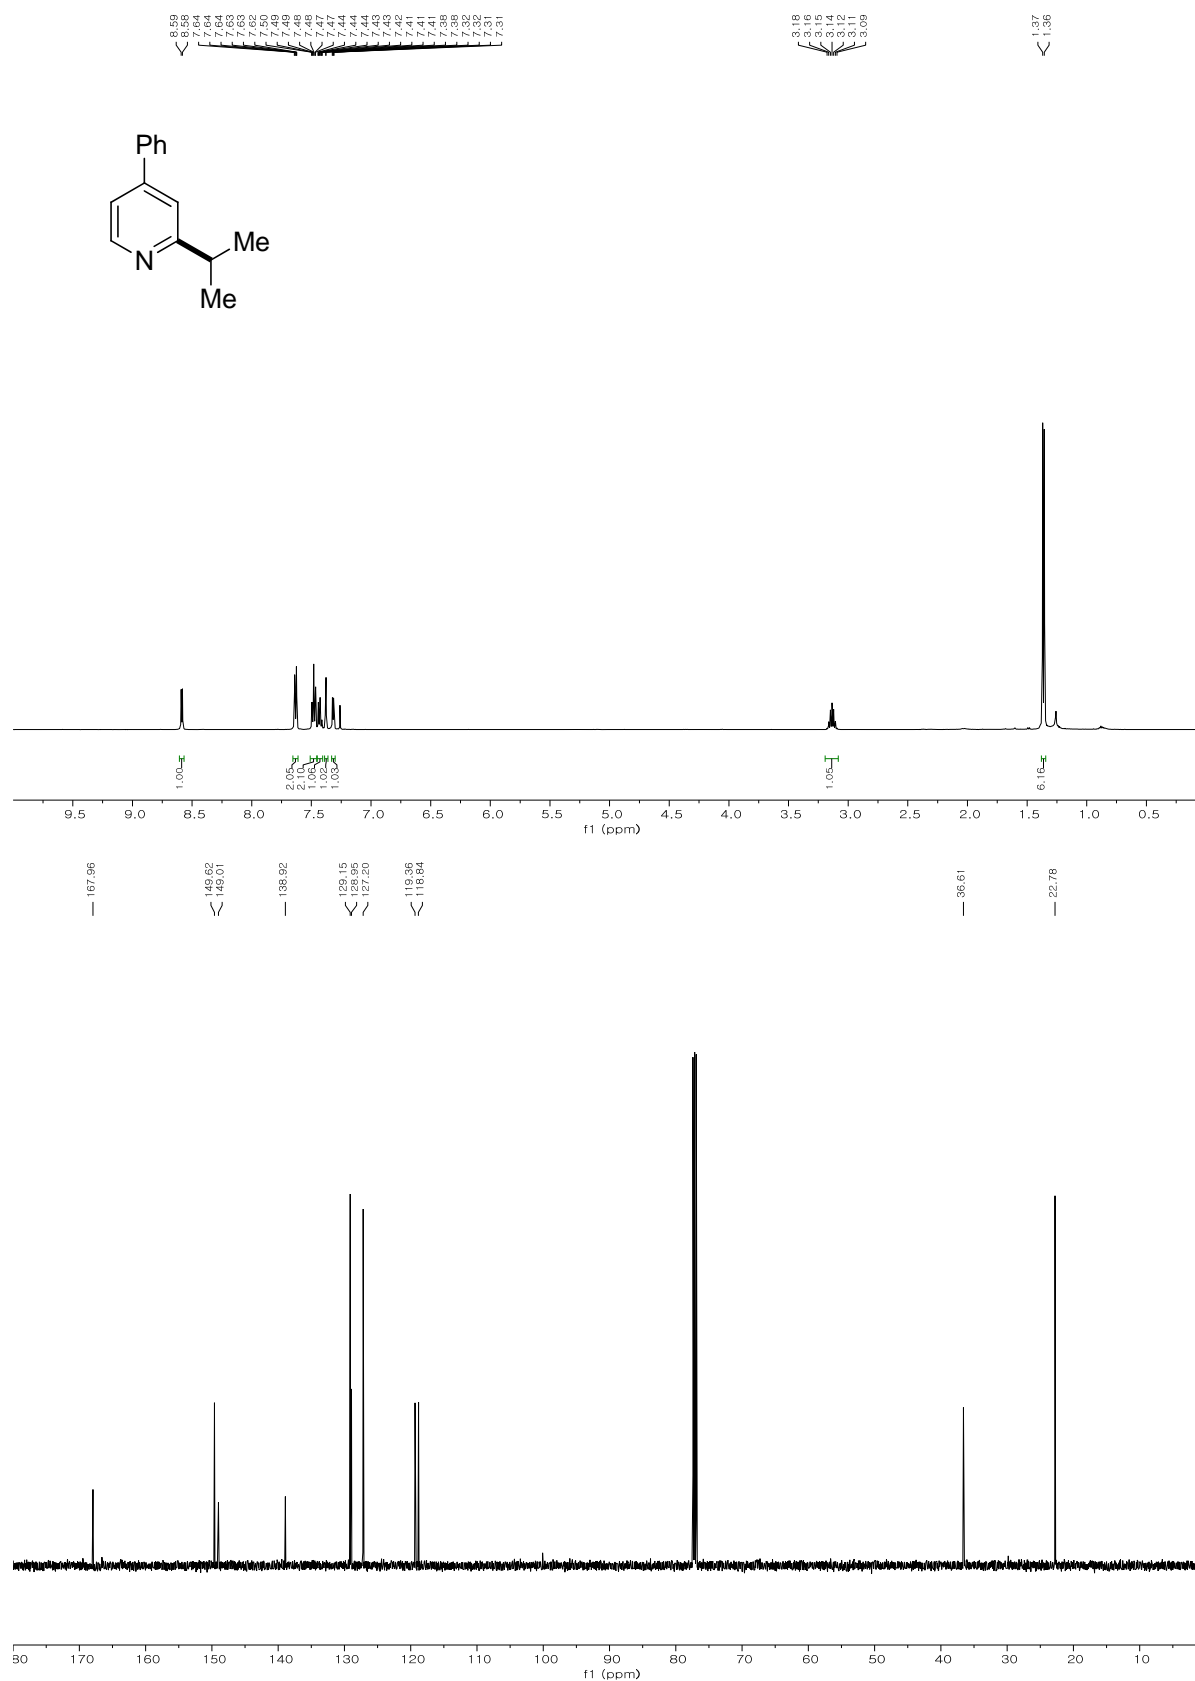

# ***N,N*-Diethyl-2-isopropylisonicotinamide (3i)**

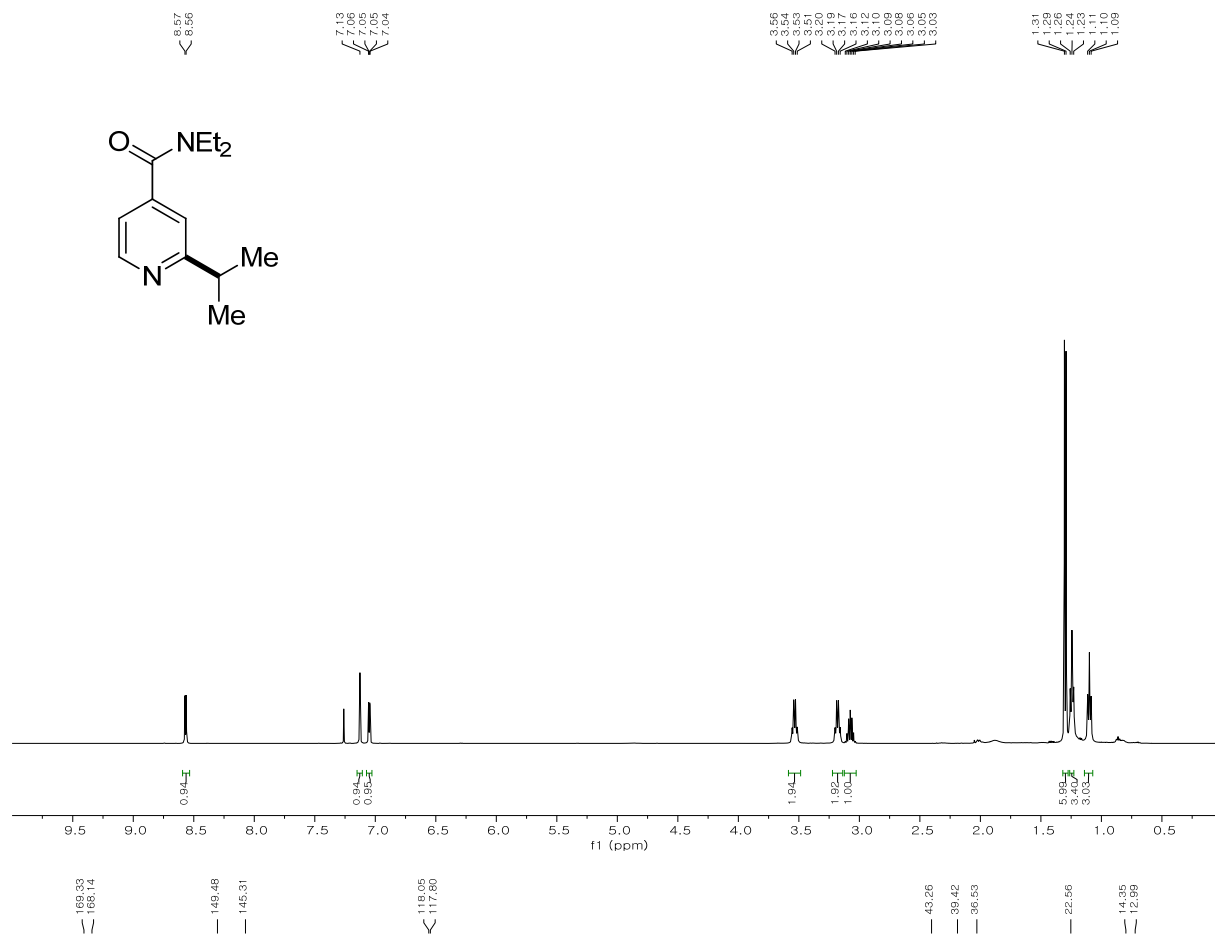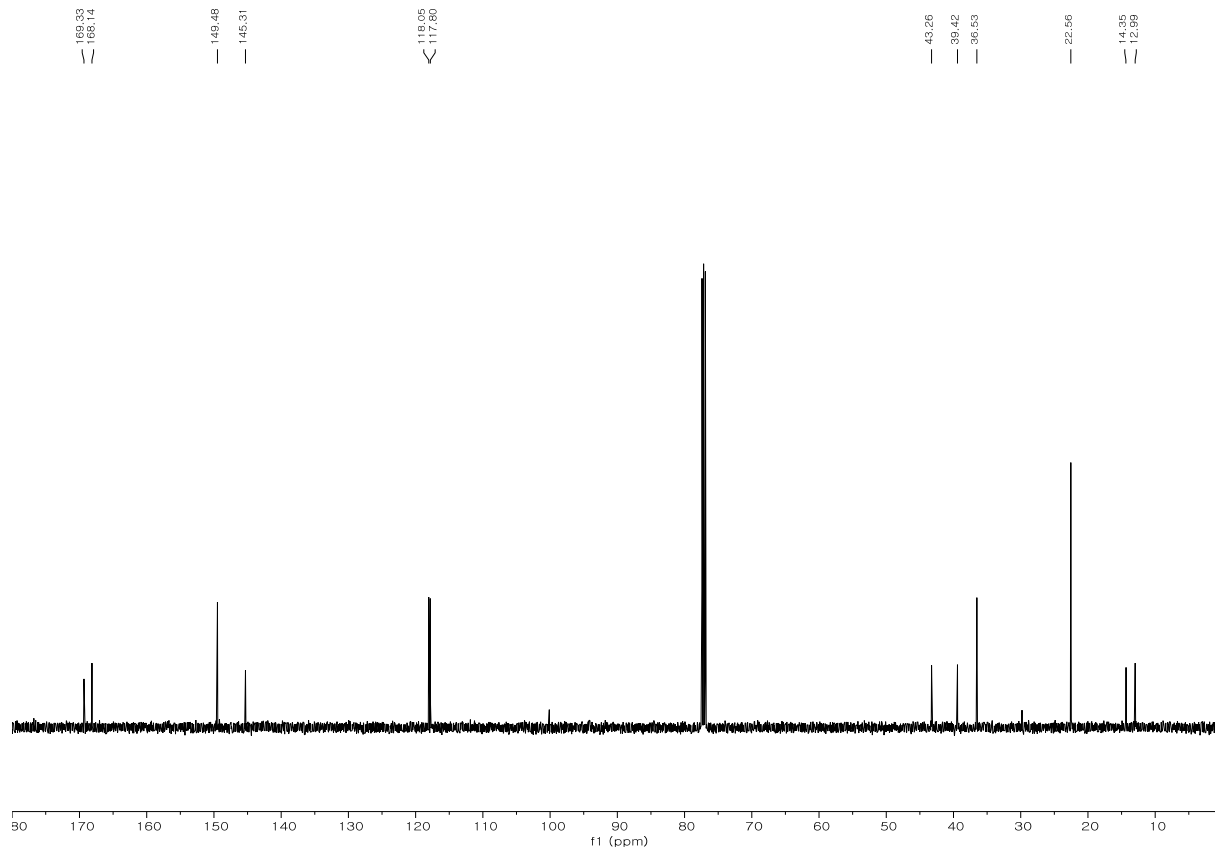

# 4-(Benzyloxy)-2-isopropylpyridine (3j)

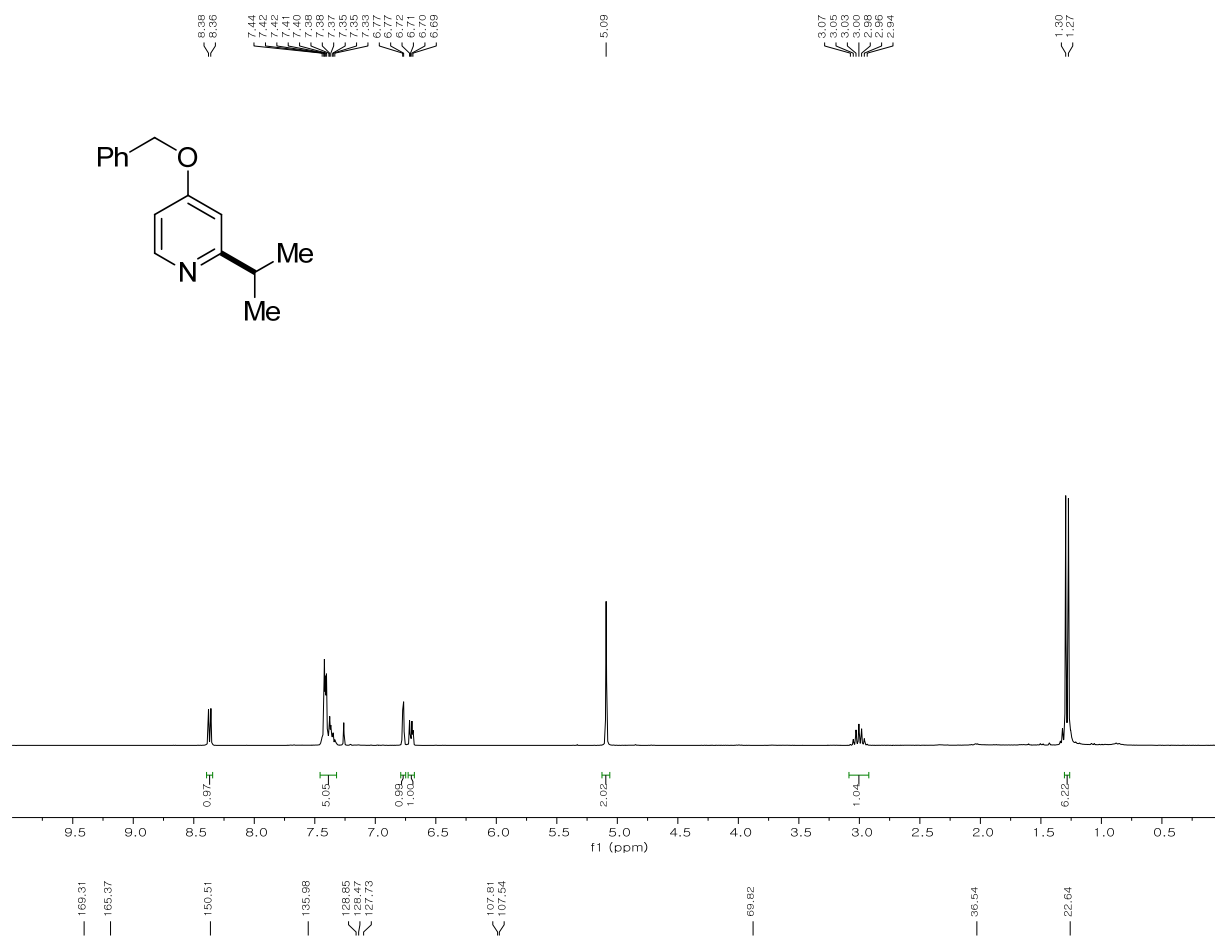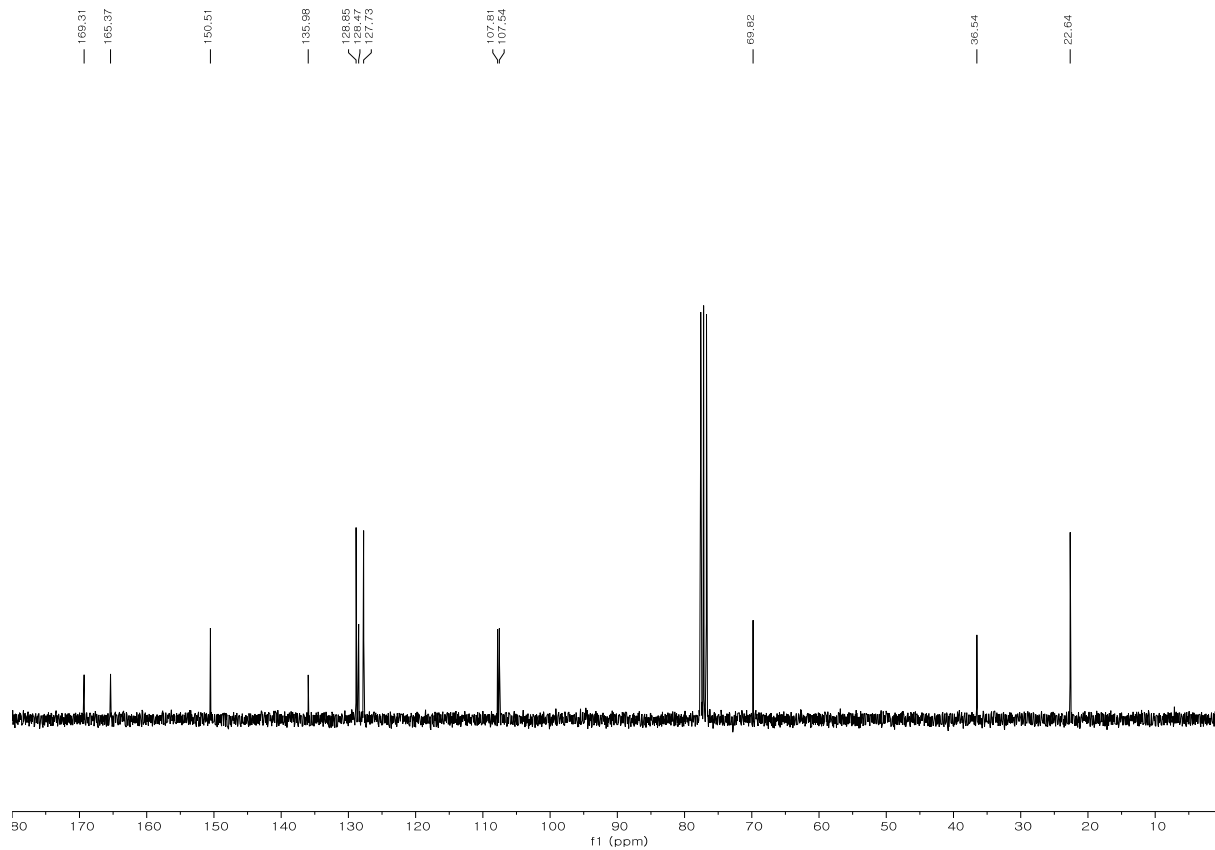



# 2-(1,3-Dioxolan-2-yl)-6-isopropylpyridine (3k)

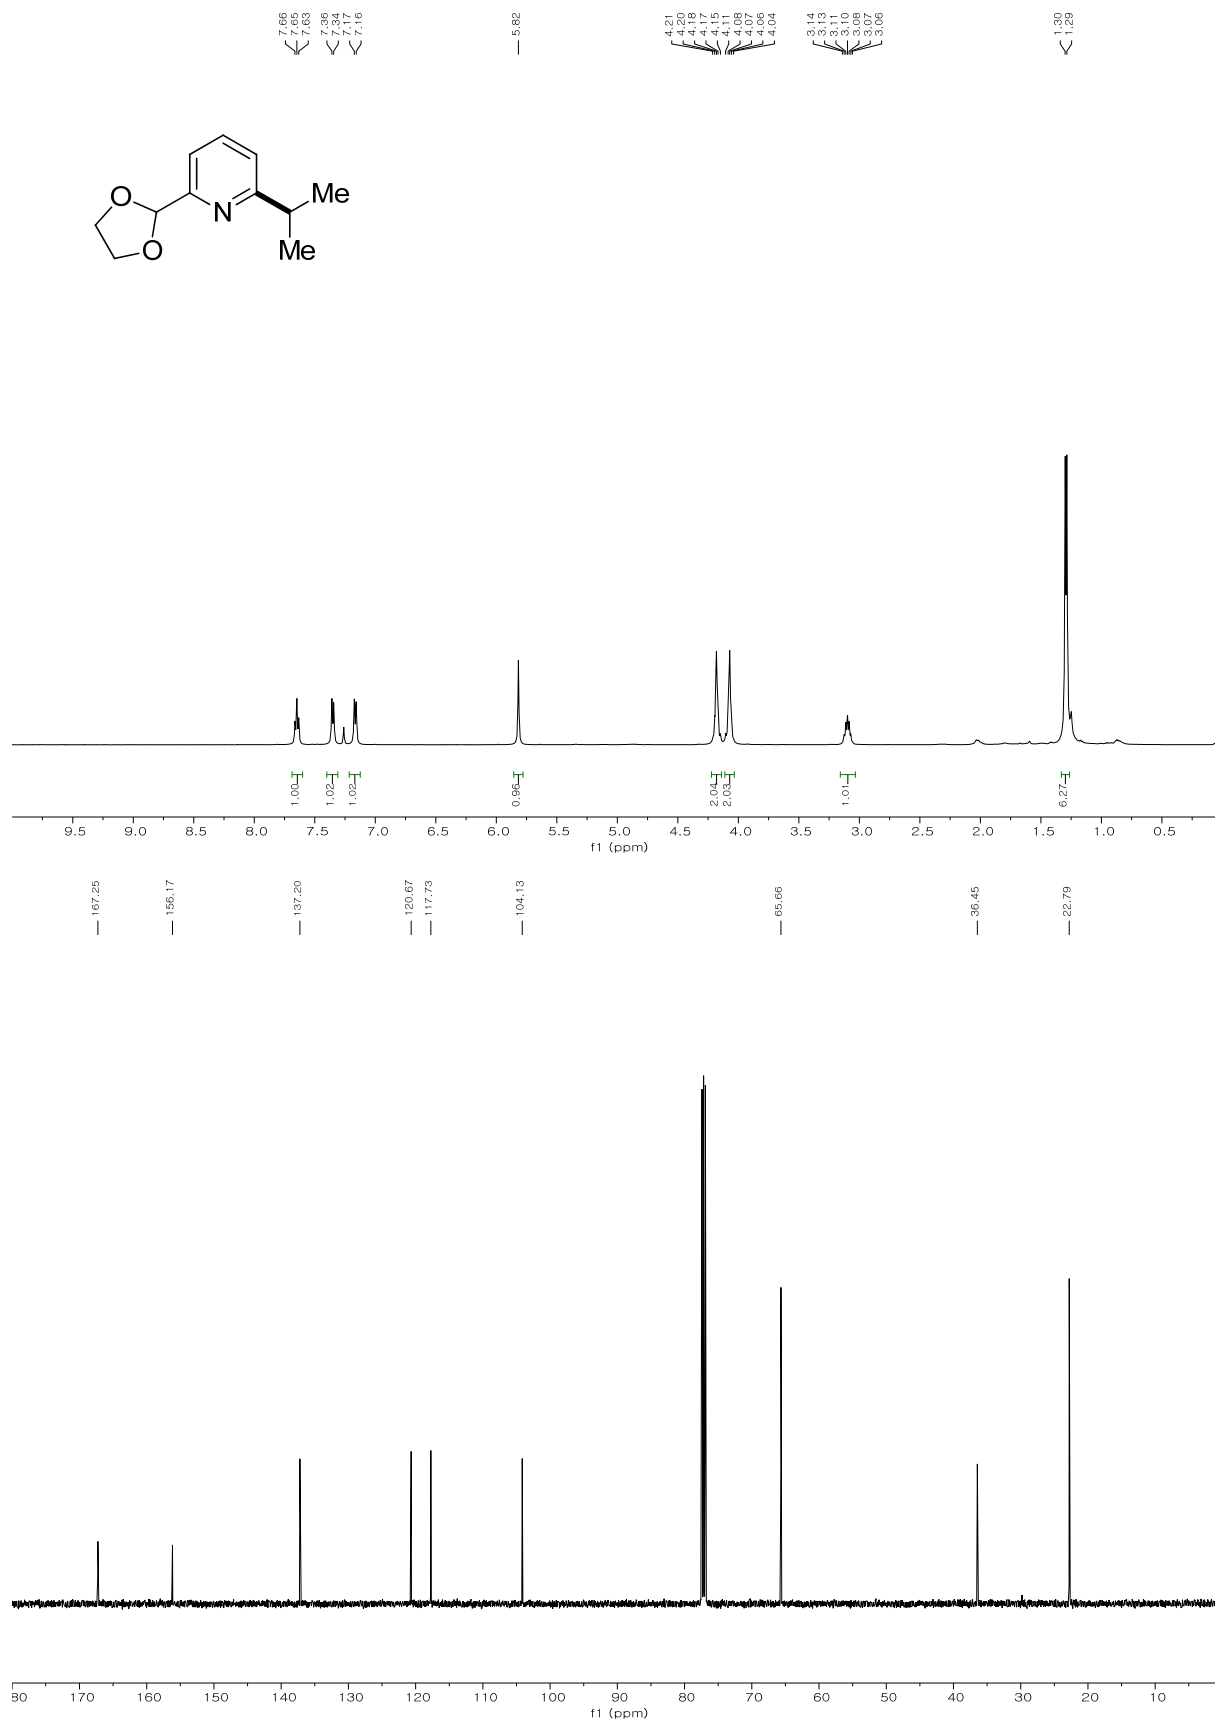

## 2-Isopropyl-5-phenylpyridine (3l)

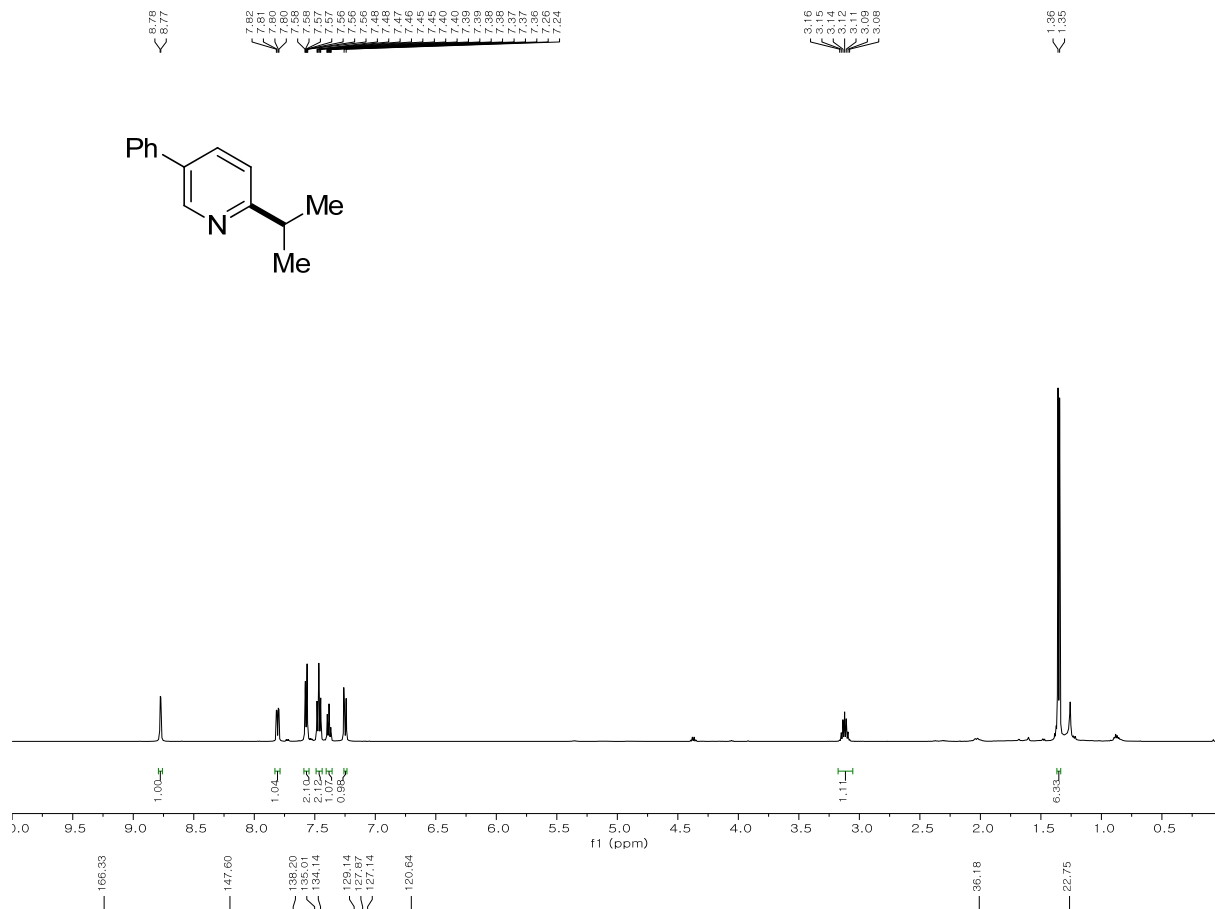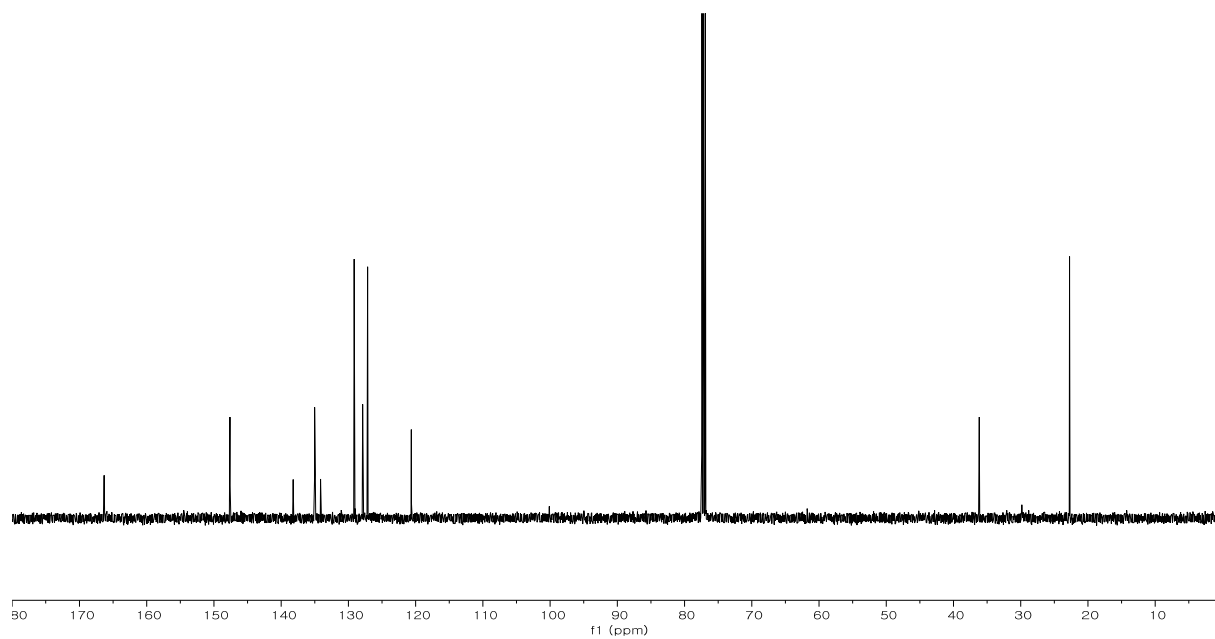

## 2-Isopropylquinoxaline (3m)

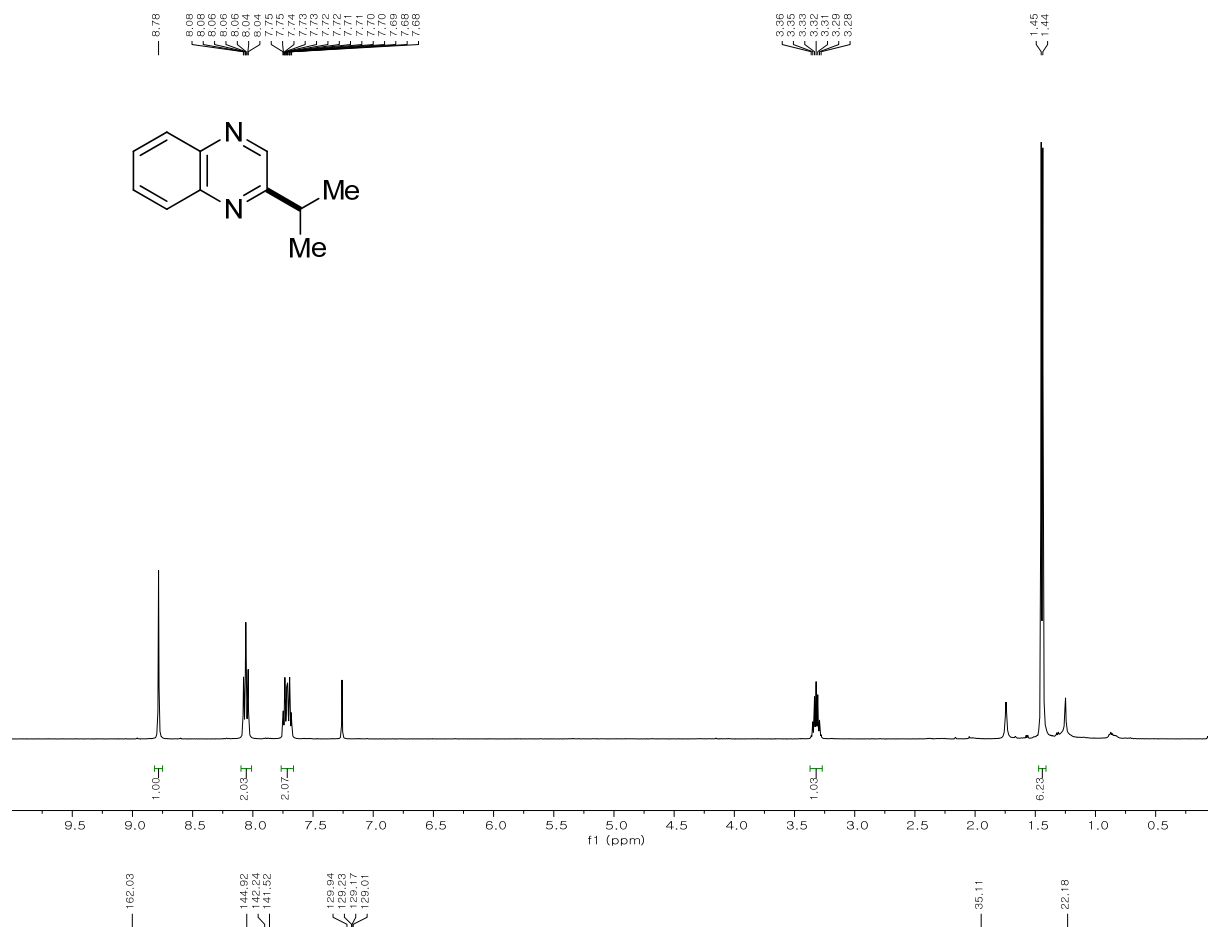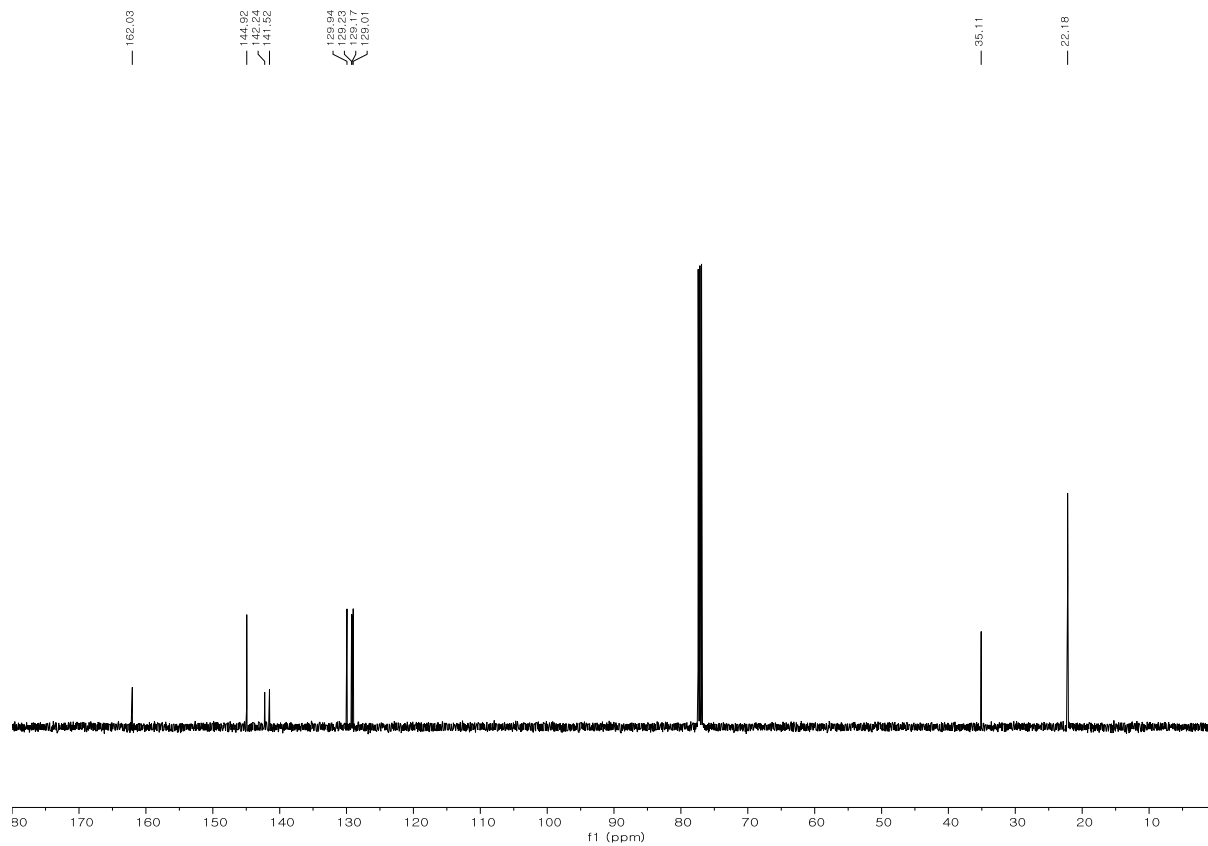

# 9-*O*-Methyl-2'-isopropylquinine (3n)

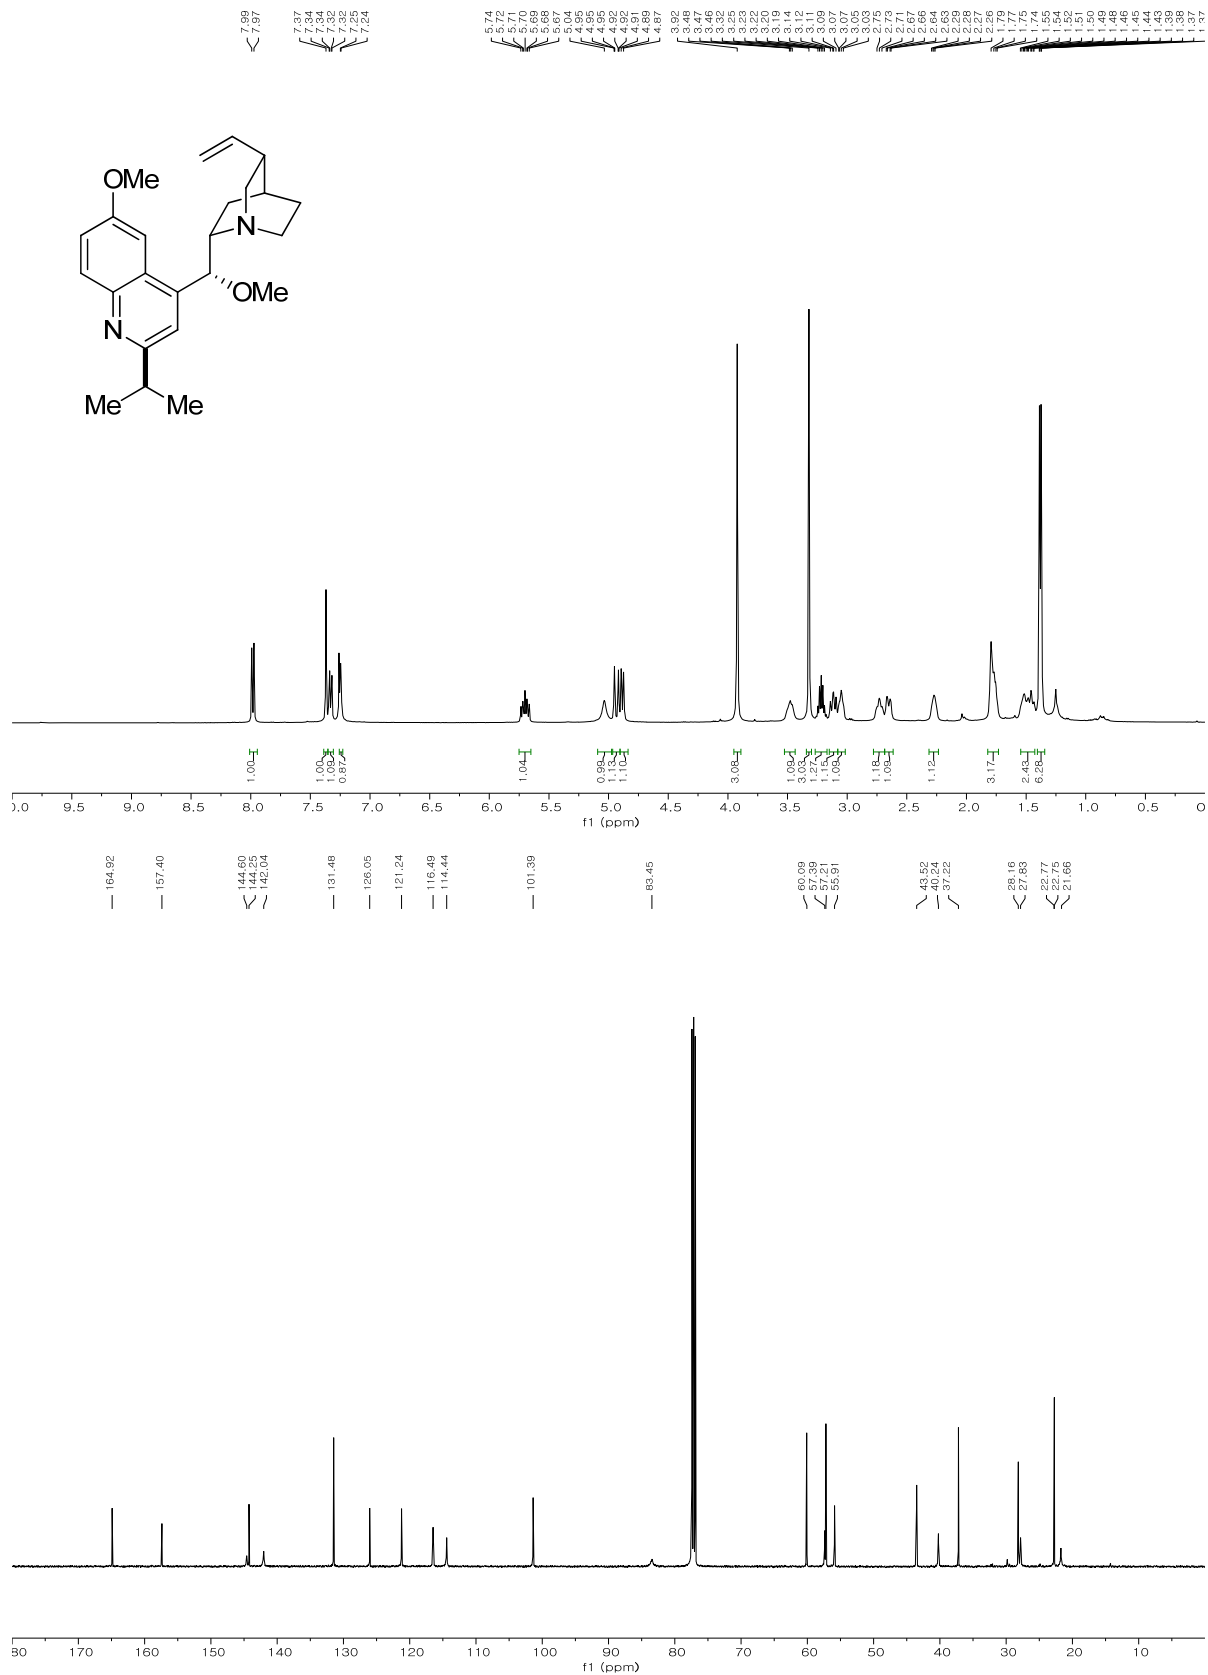

# 2-(*sec*-Butyl)benzo[*h*]quinoline (4a)

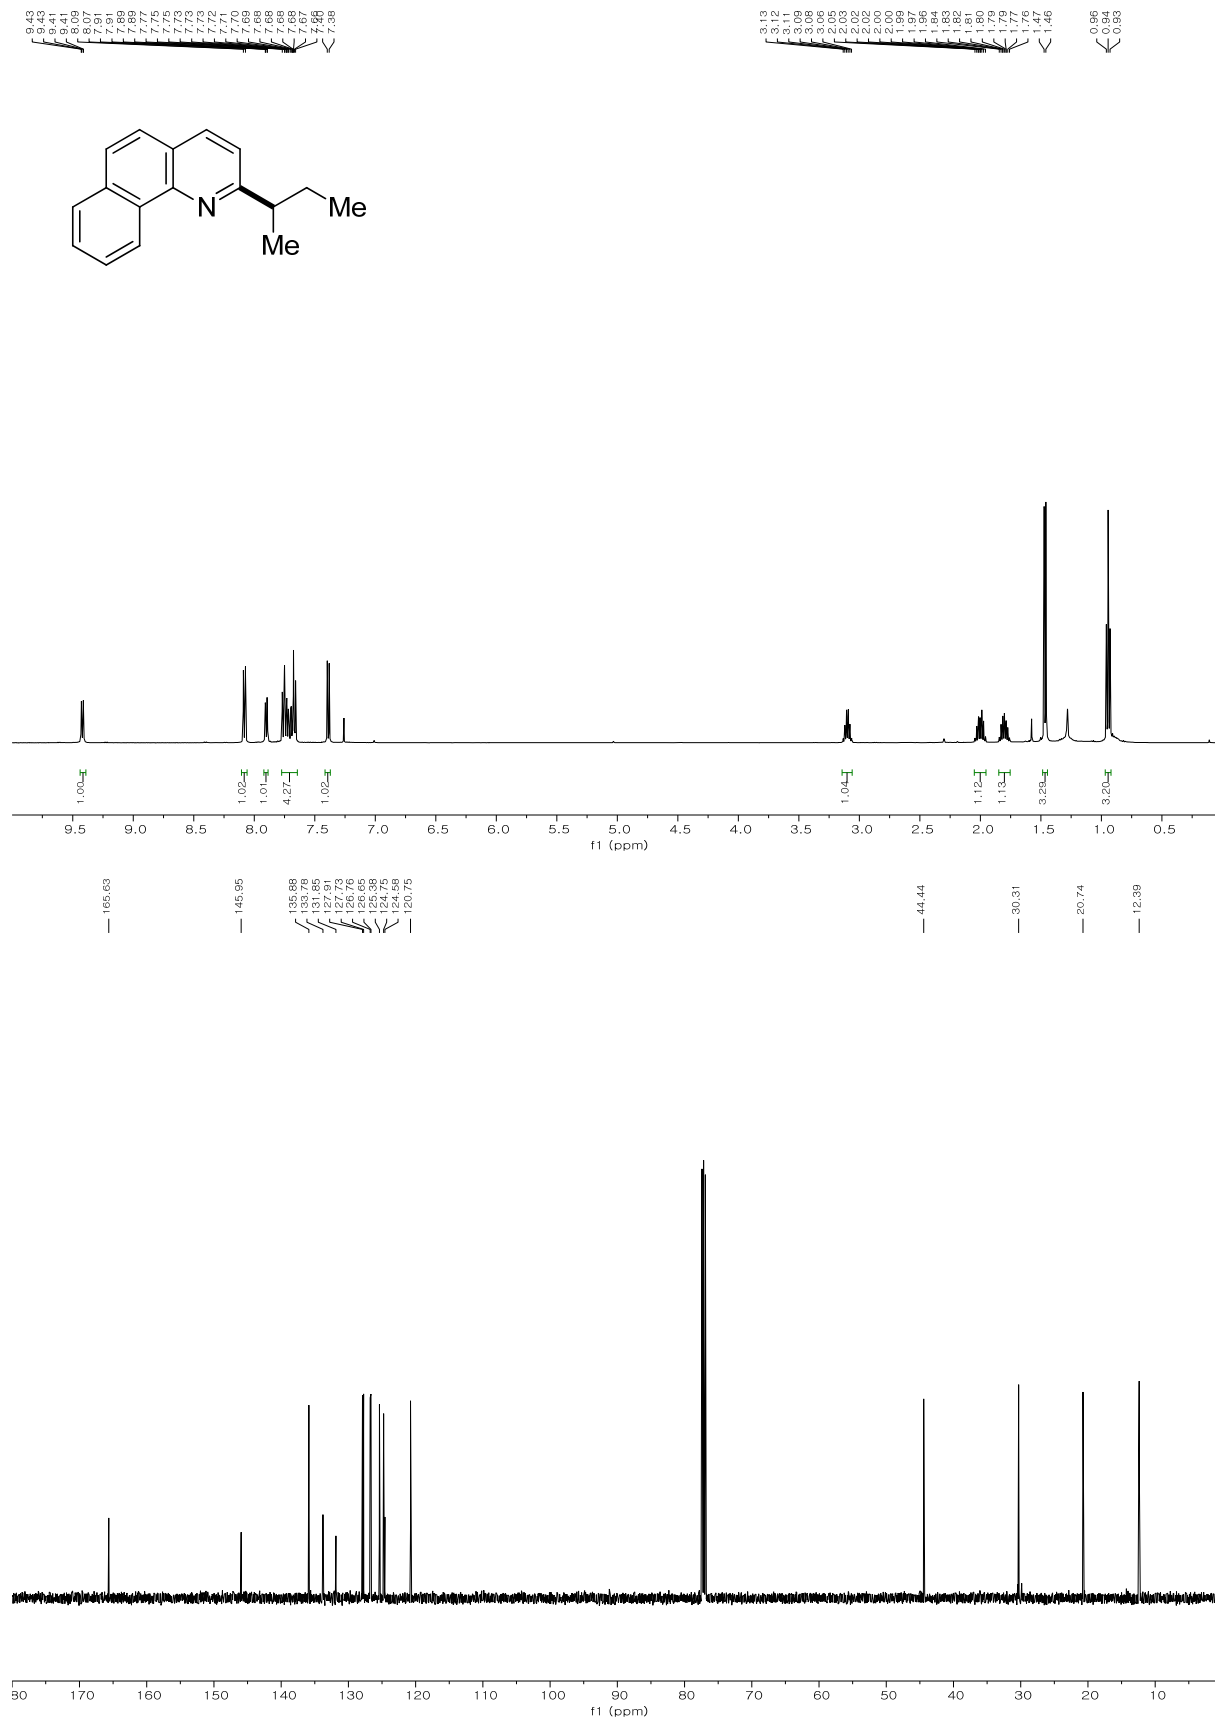

# 2-(1-Phenylpropan-2-yl)benzo[h]quinoline (4b)

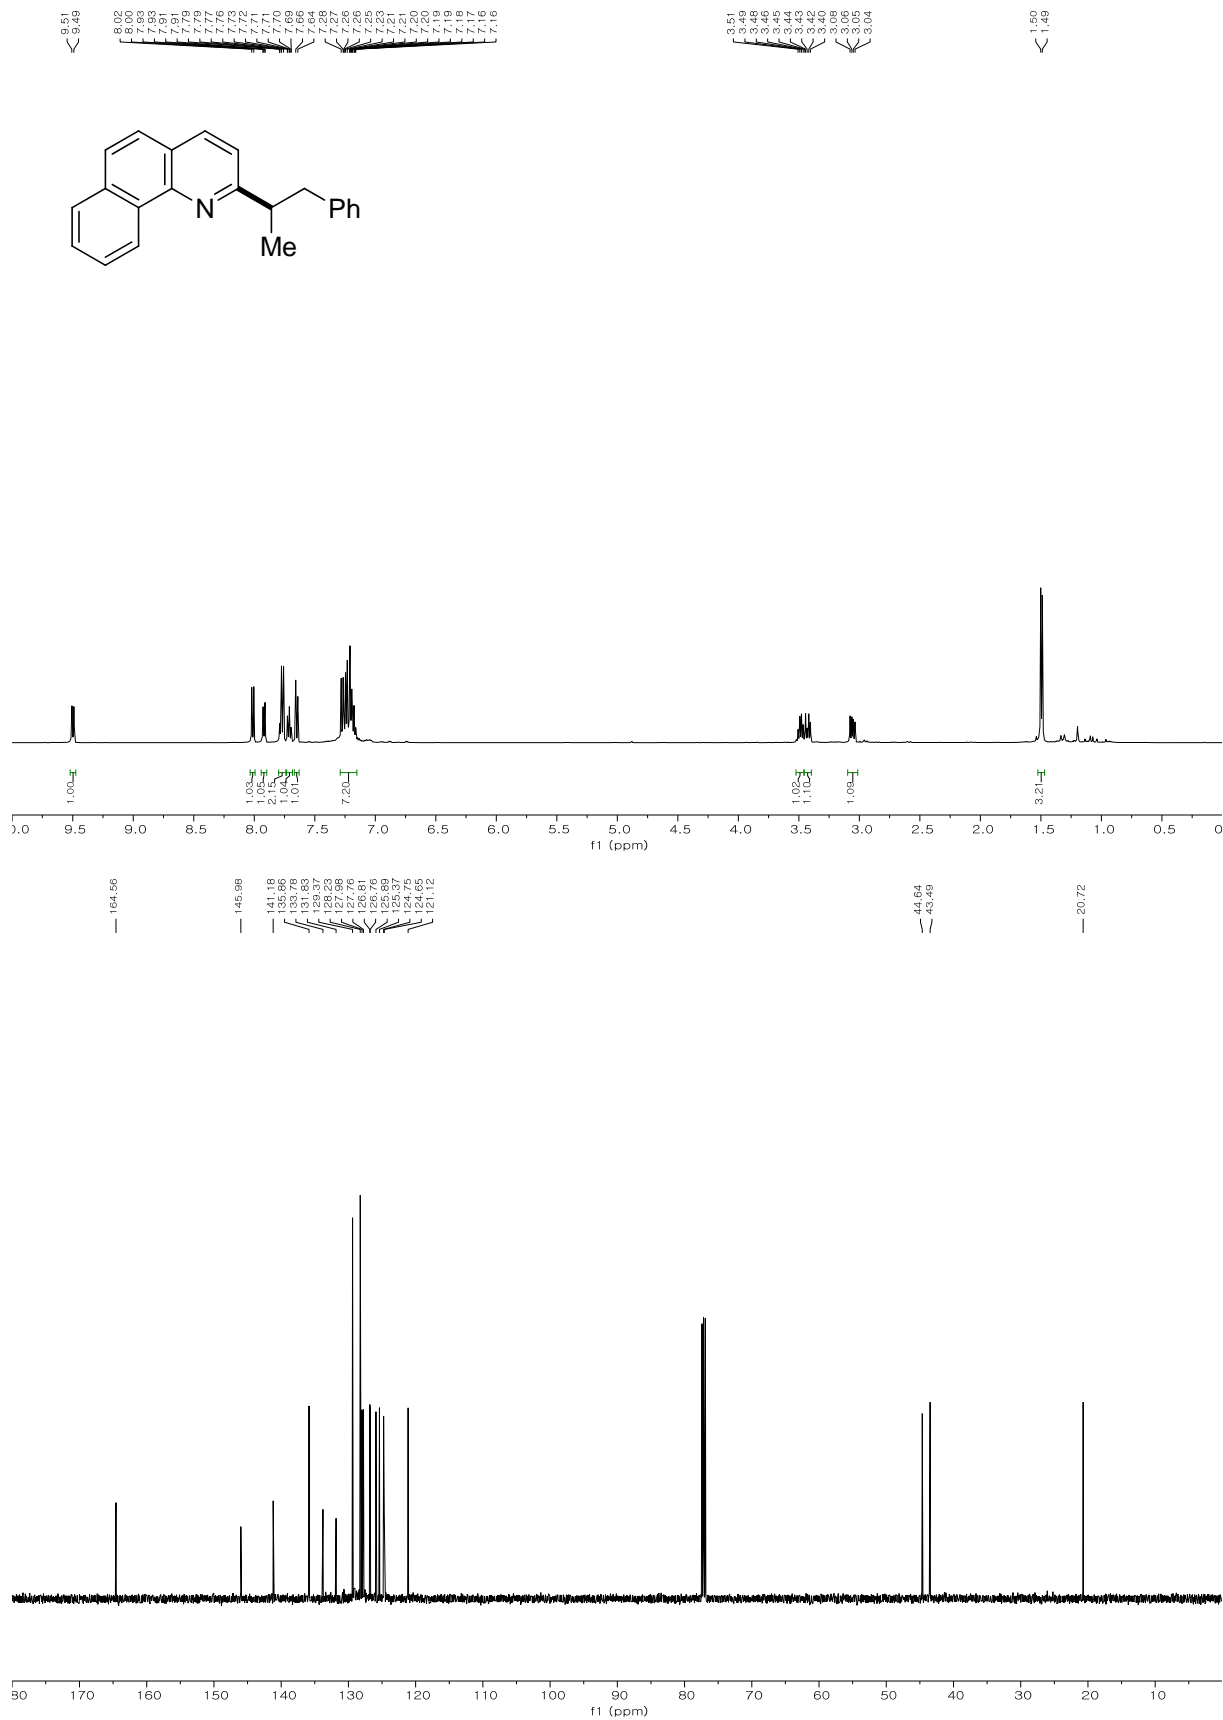

# 2-(5-Methylhex-4-en-2-yl)benzo[*h*]quinoline (4c)

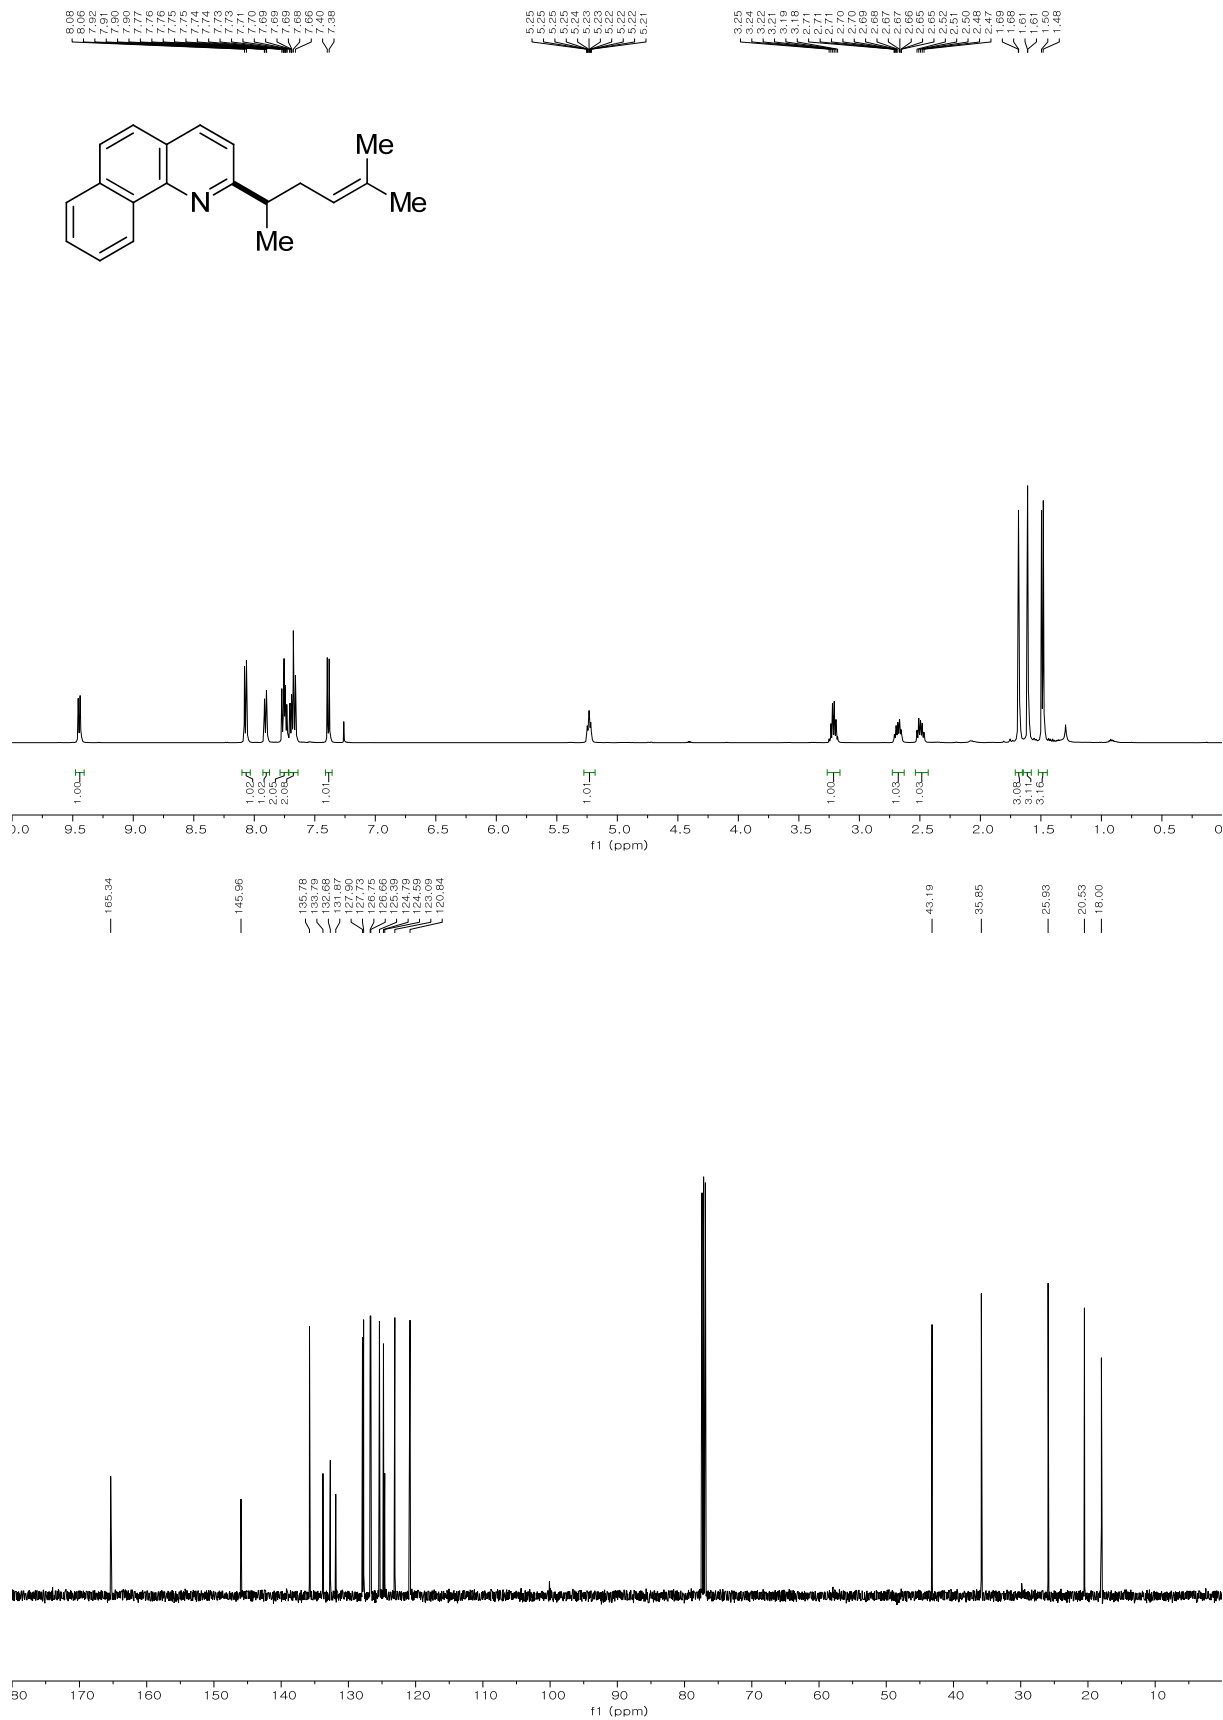

[illegible]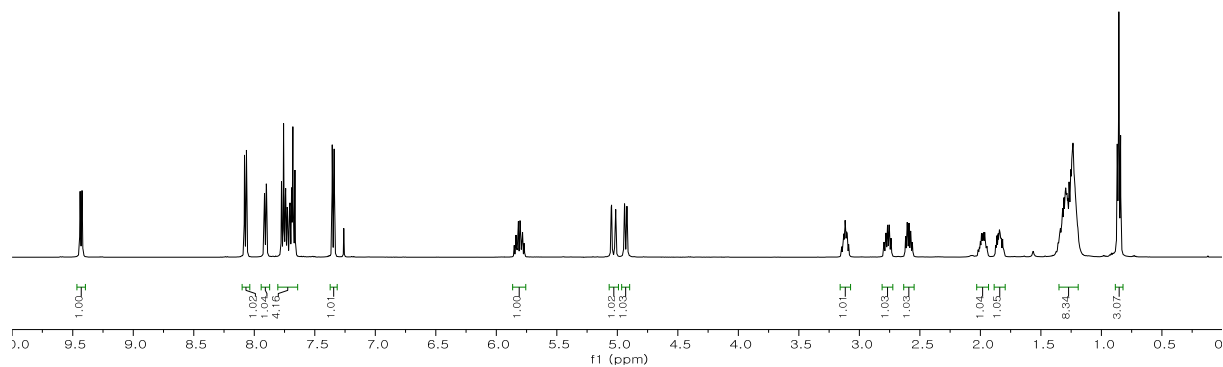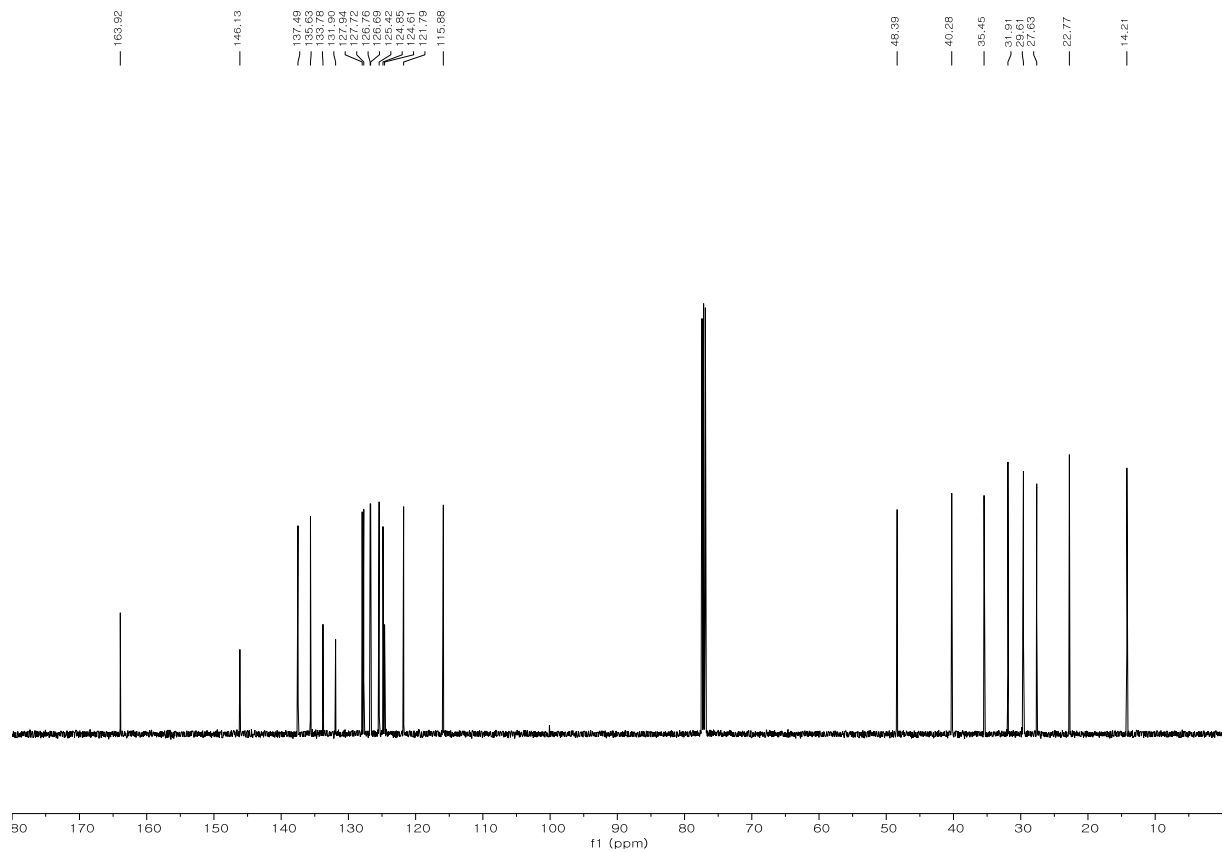



# 2-(1-Phenyl octan-2-yl)benzo[h]quinoline (4e)

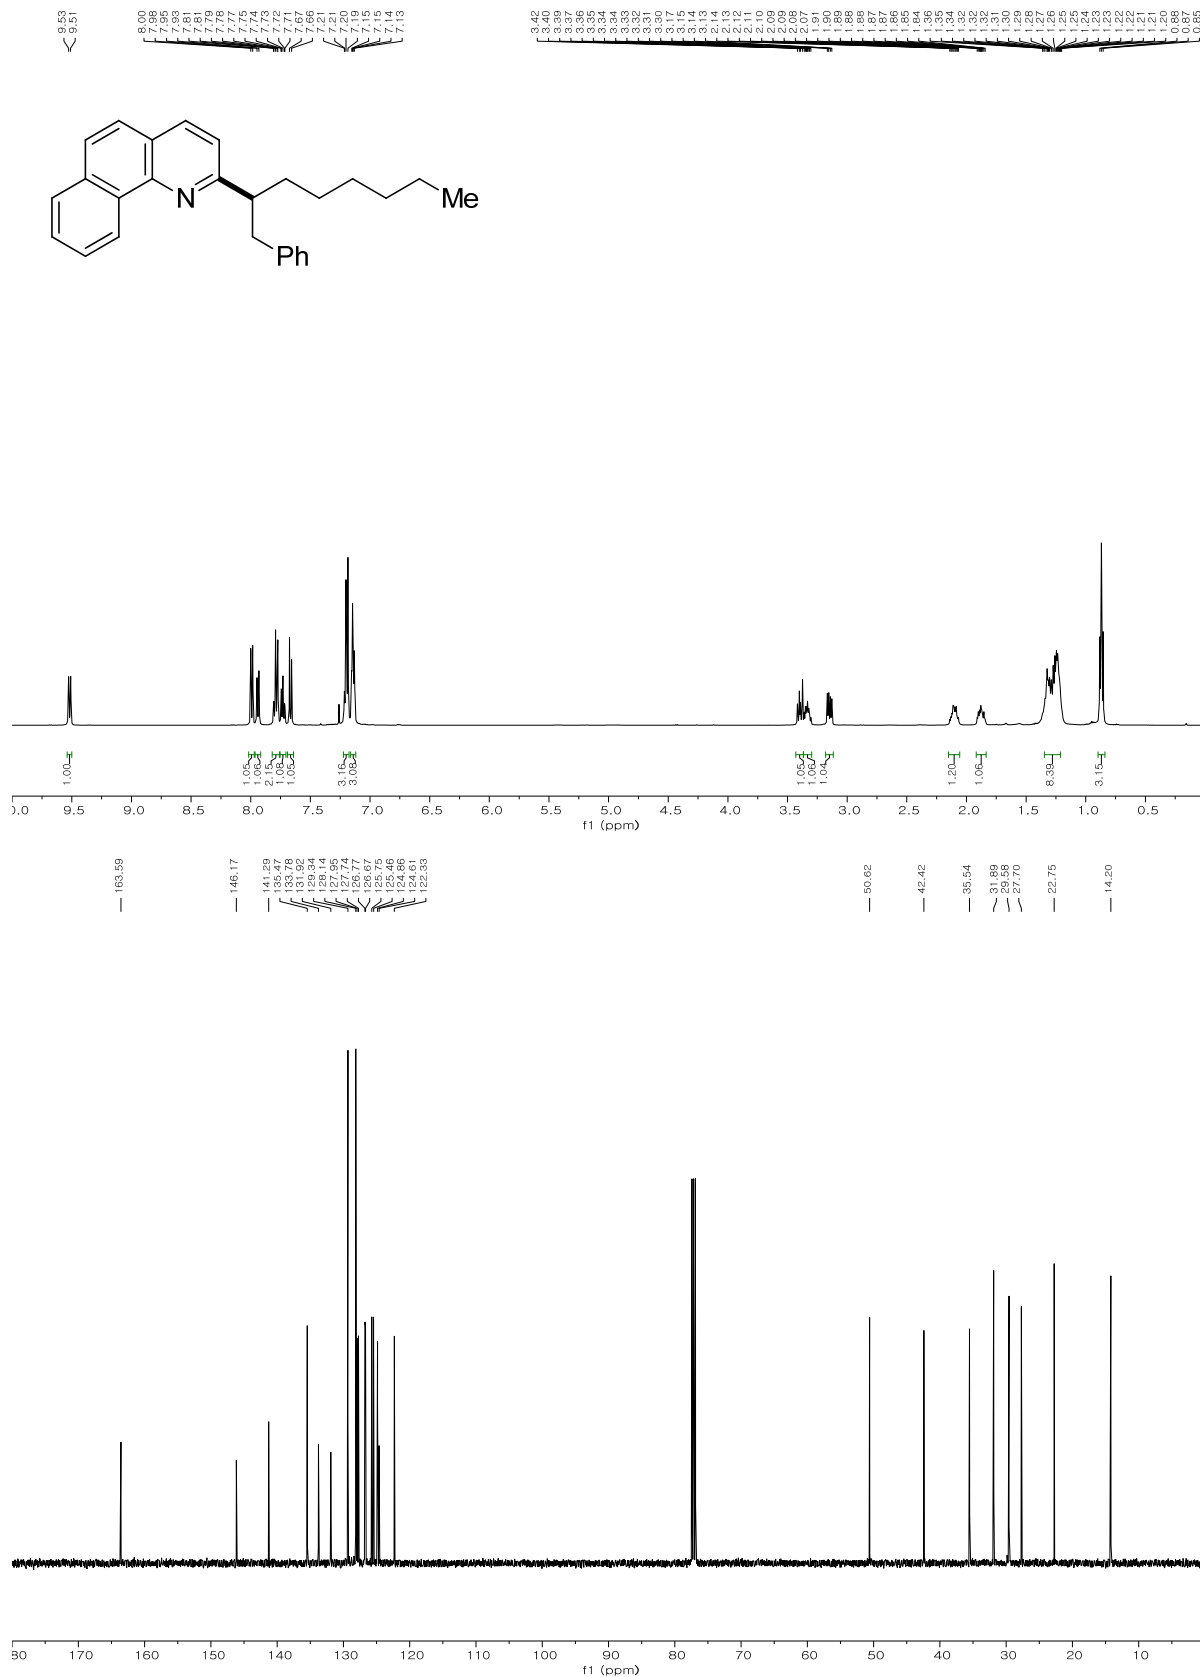

# 2-(*sec*-Butyl)-6-methoxyquinoline (4f)

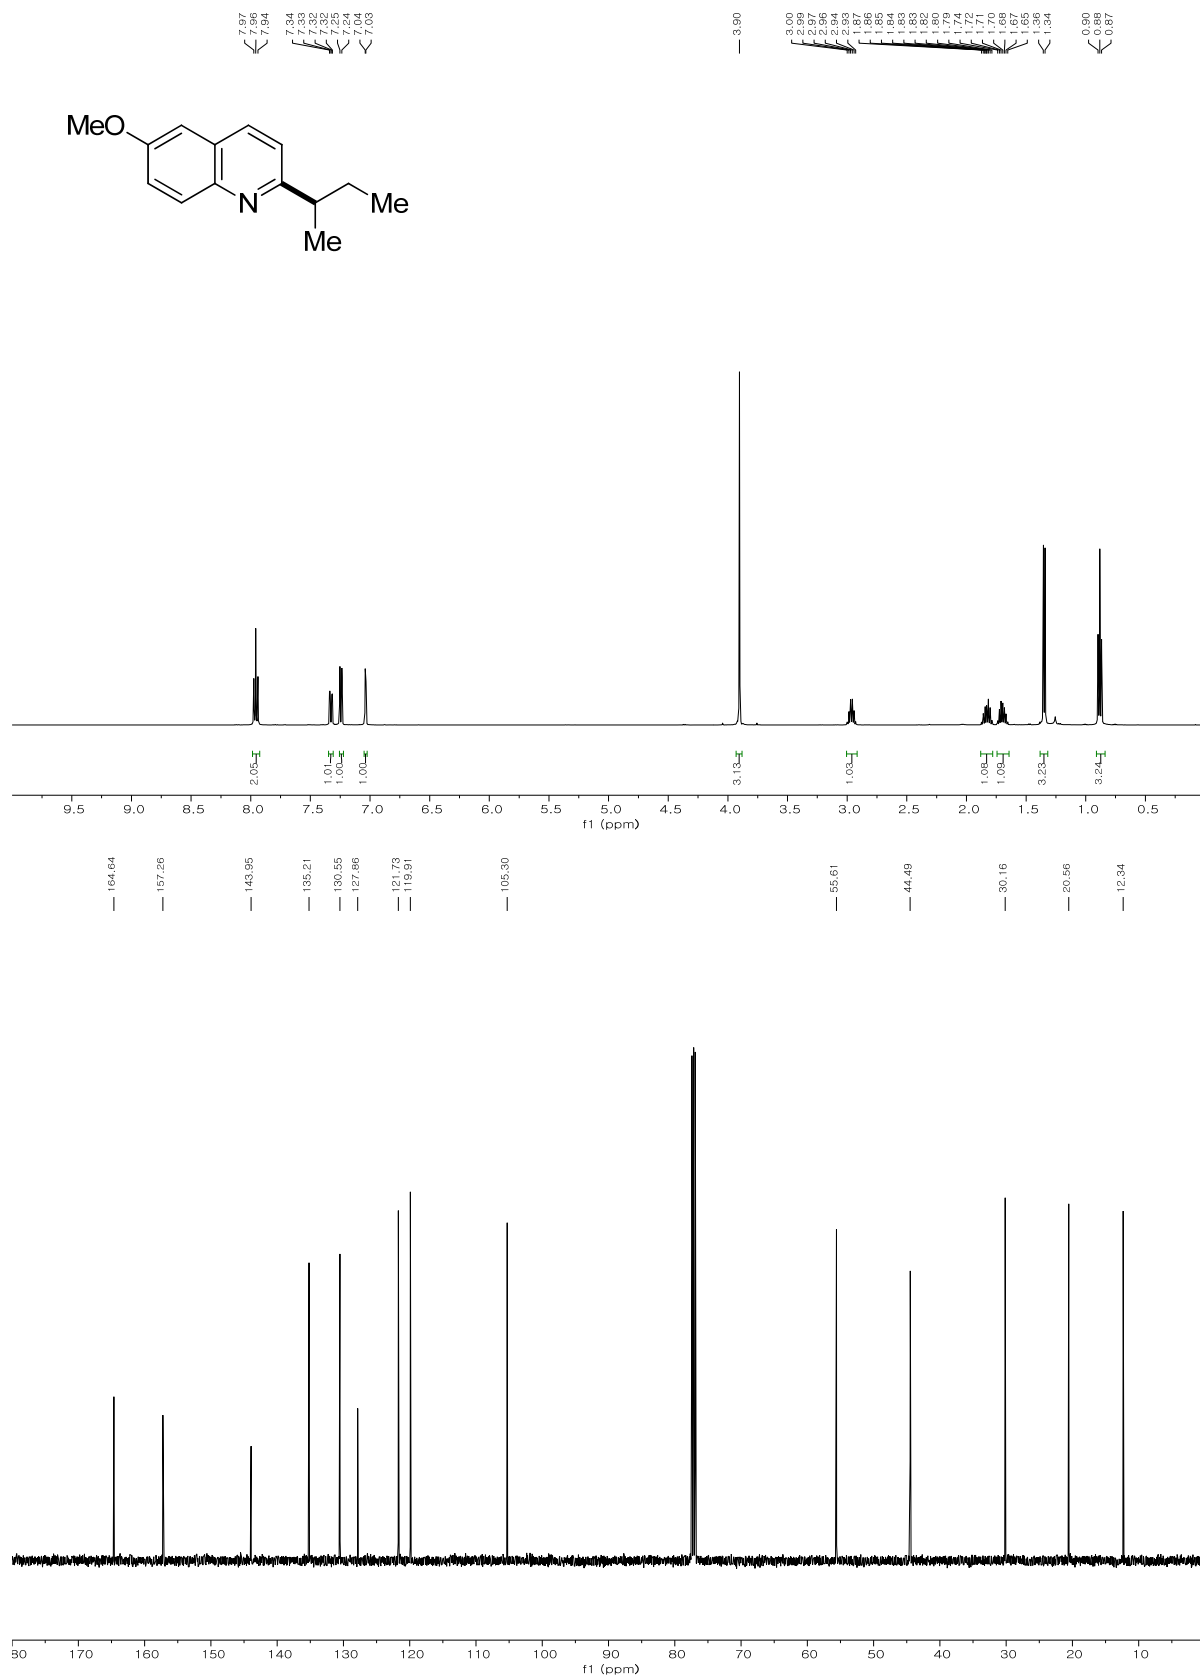

# 2-(sec-Butyl)-6-phenylpyridine (4g)

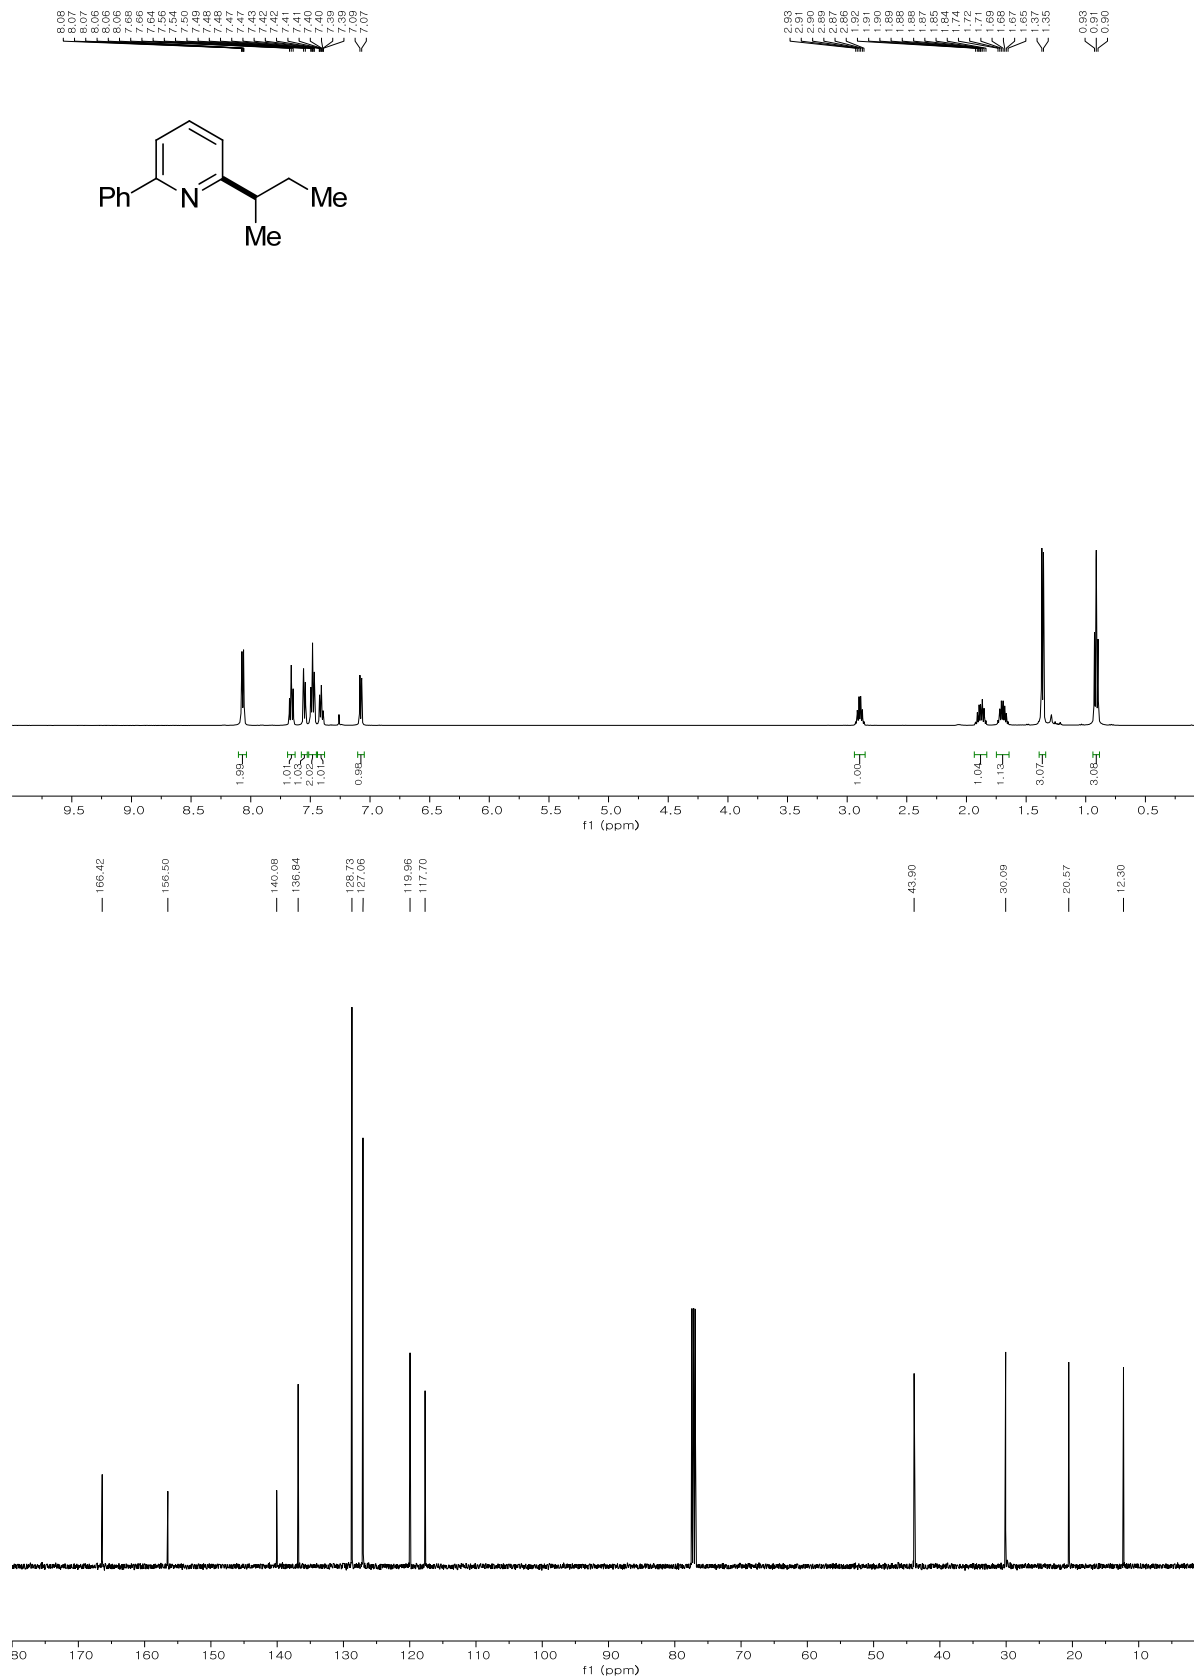

## 2-(Dec-1-en-4-yl)-6-phenylpyridine (4h)

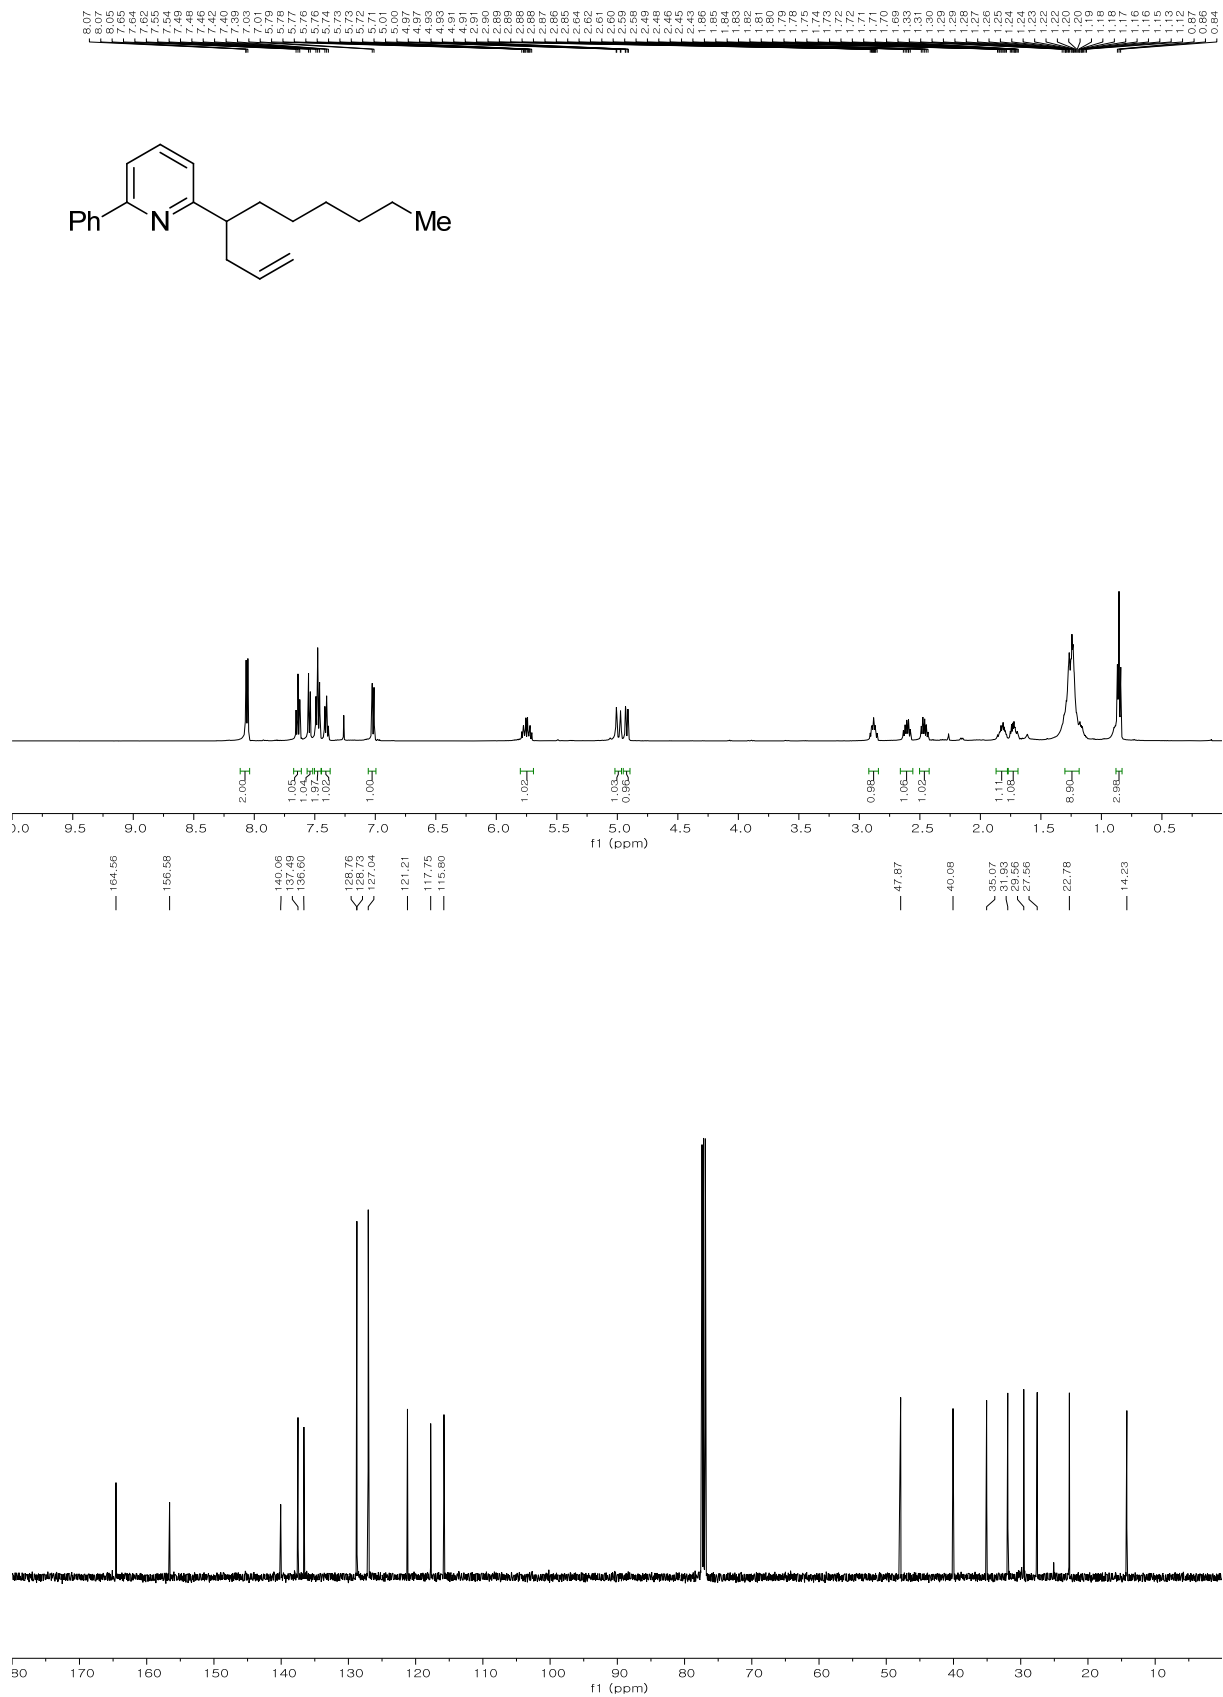

## 2-(1-Phenylpropan-2-yl)pyridine (4i)

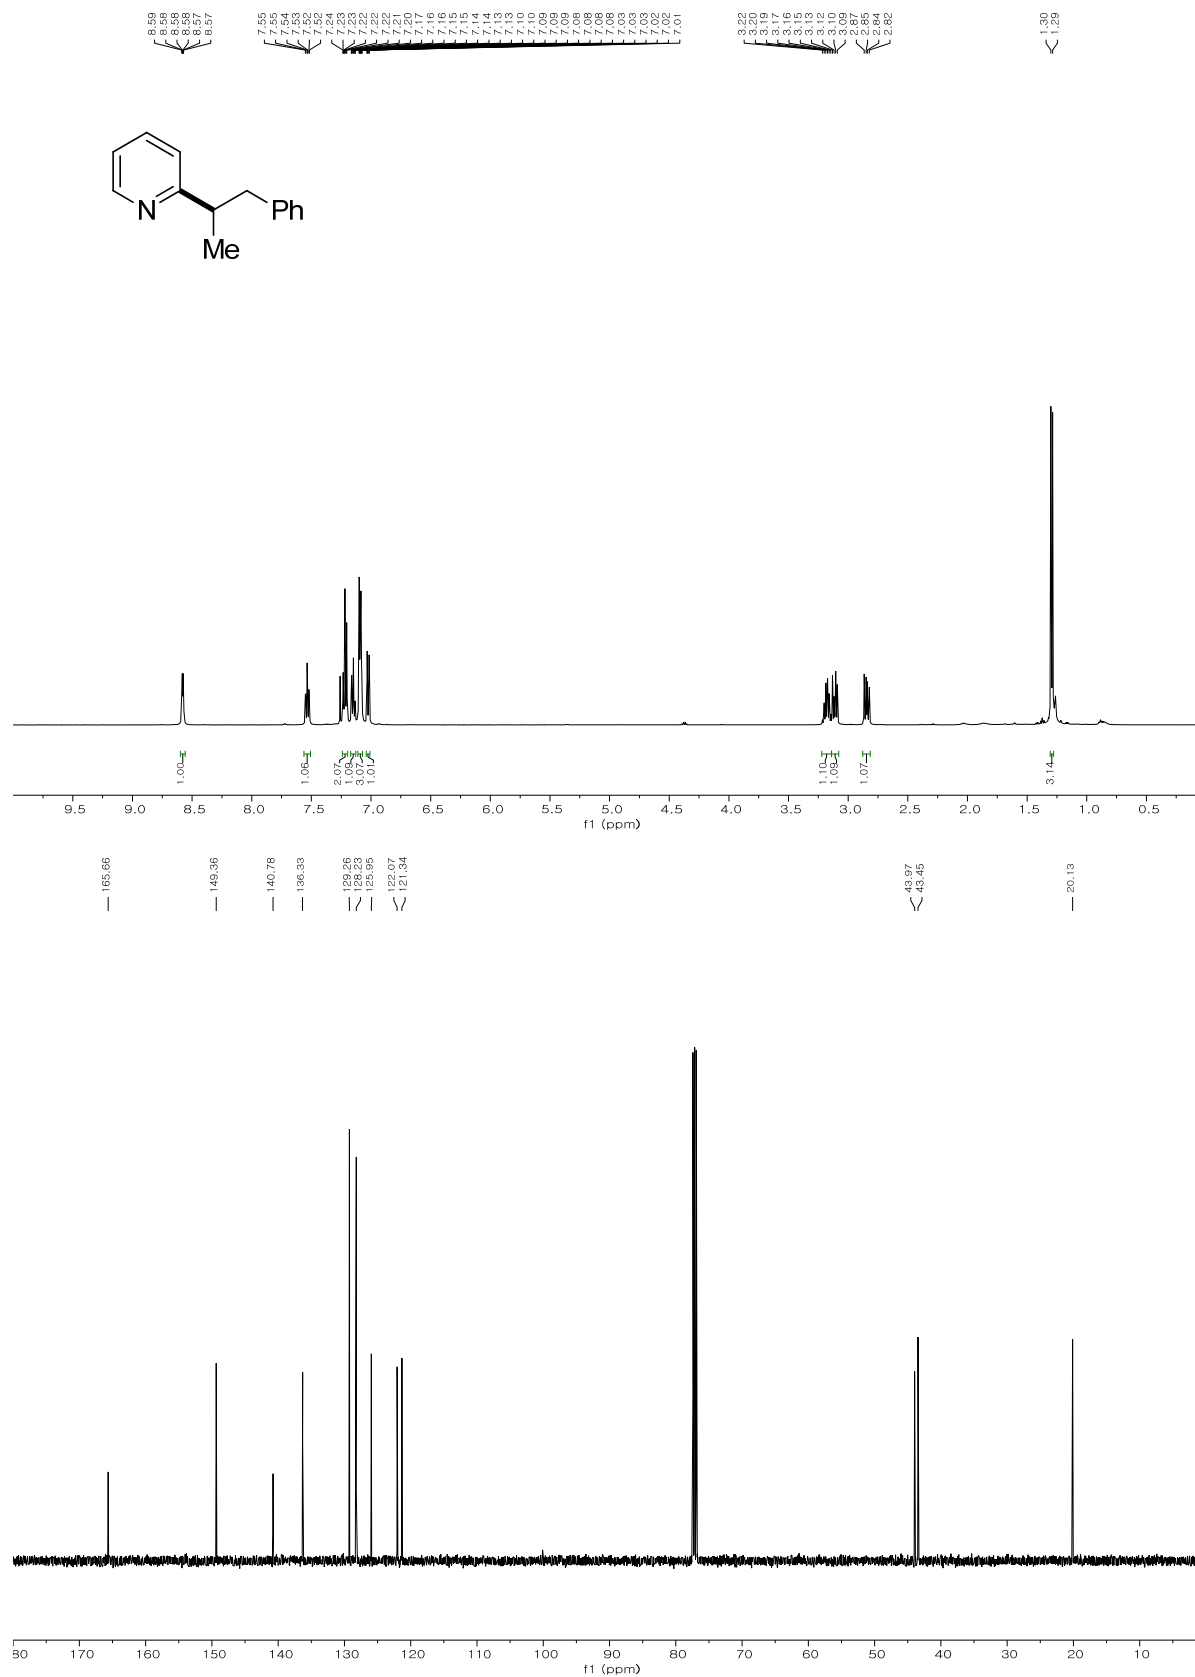

# 9-*O*-Methyl-2'-*sec*-butylquinine (4j)

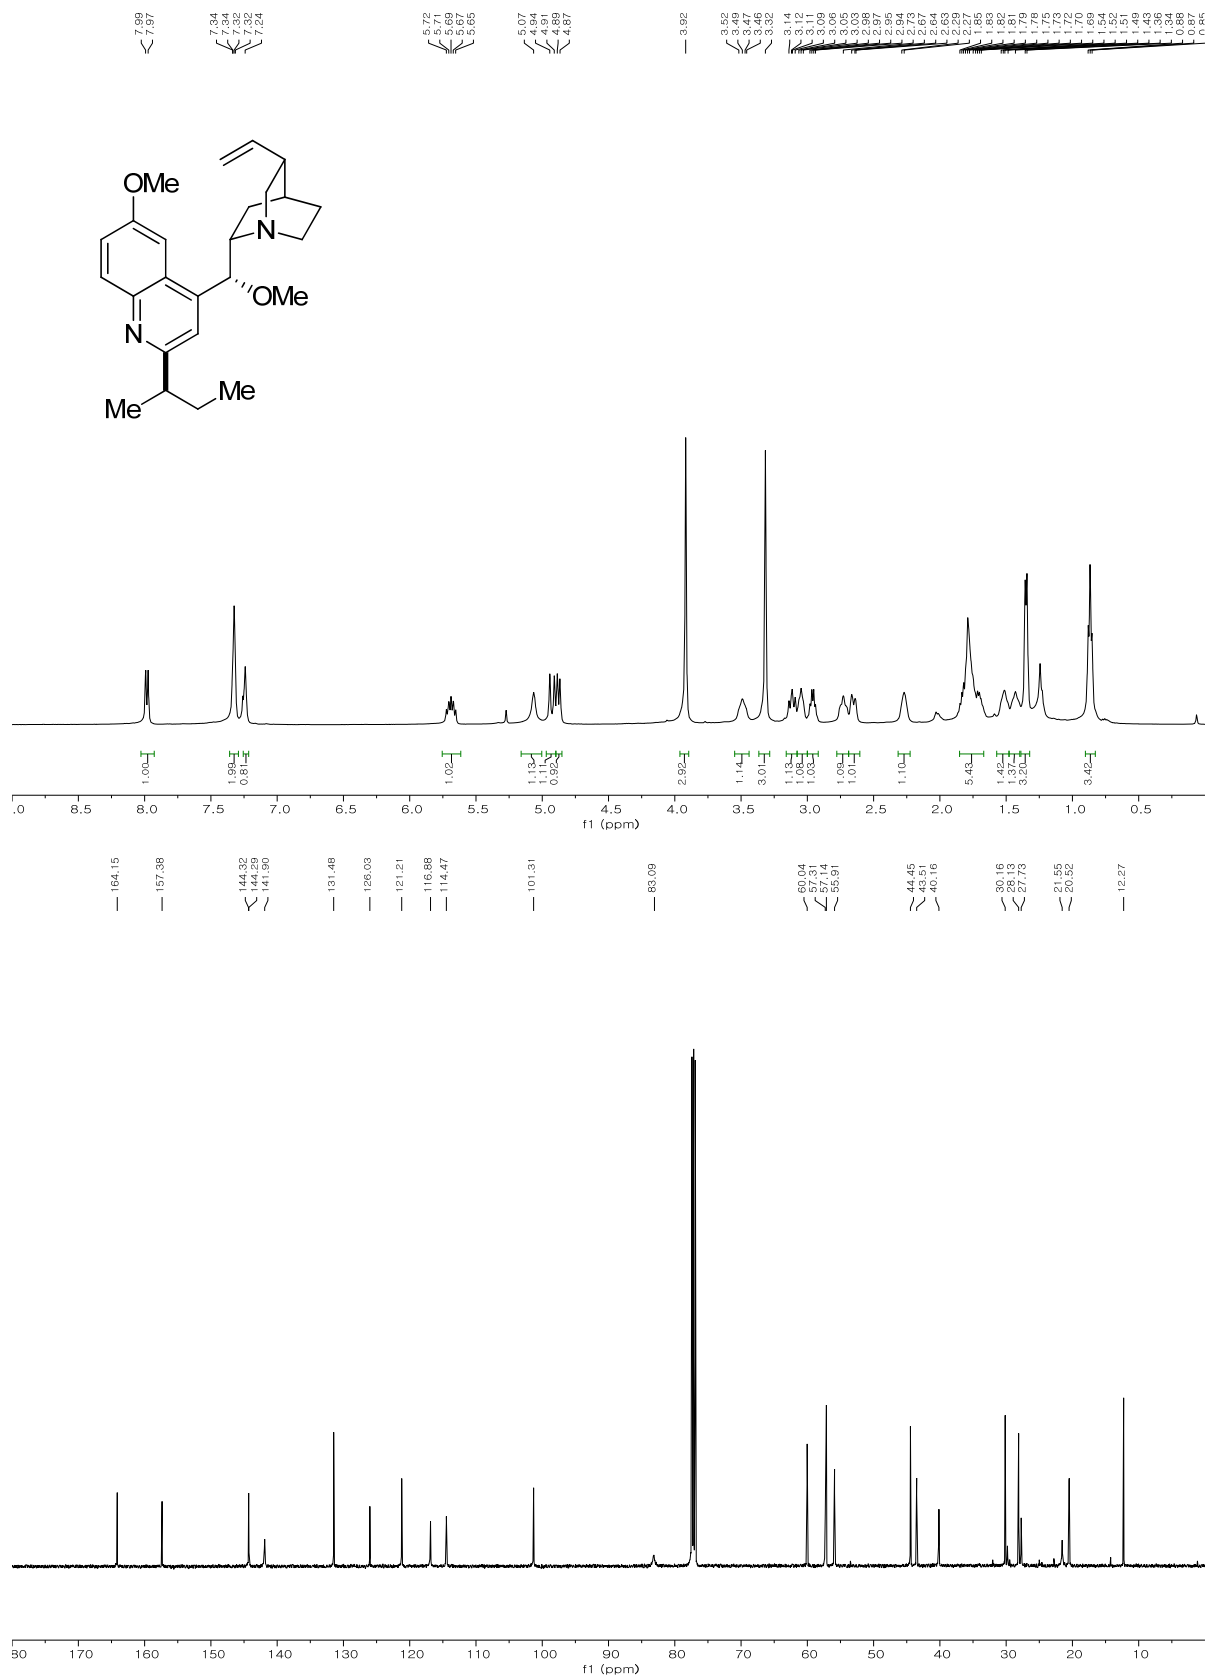

## 2,2'-Bipyridine-*N*-oxide (5a)

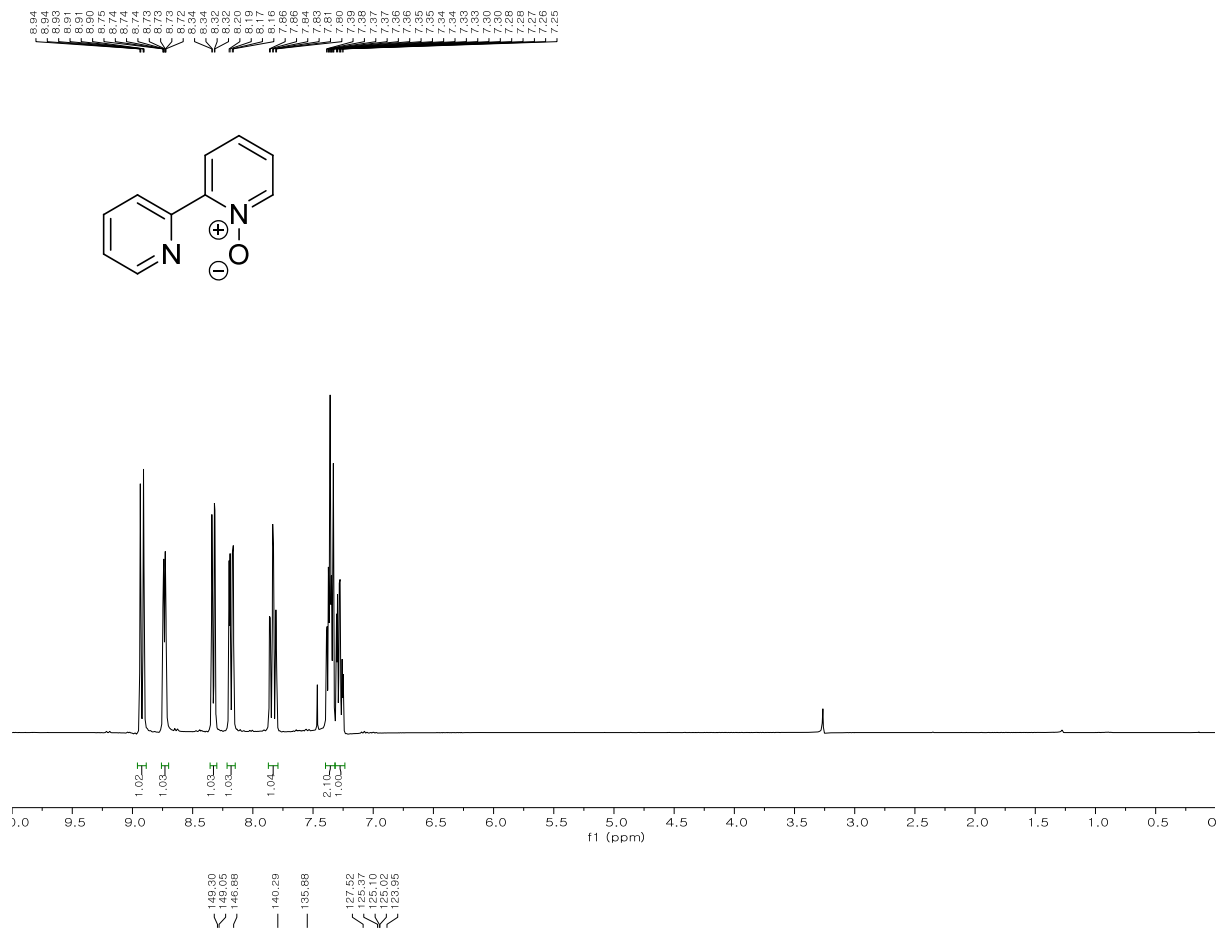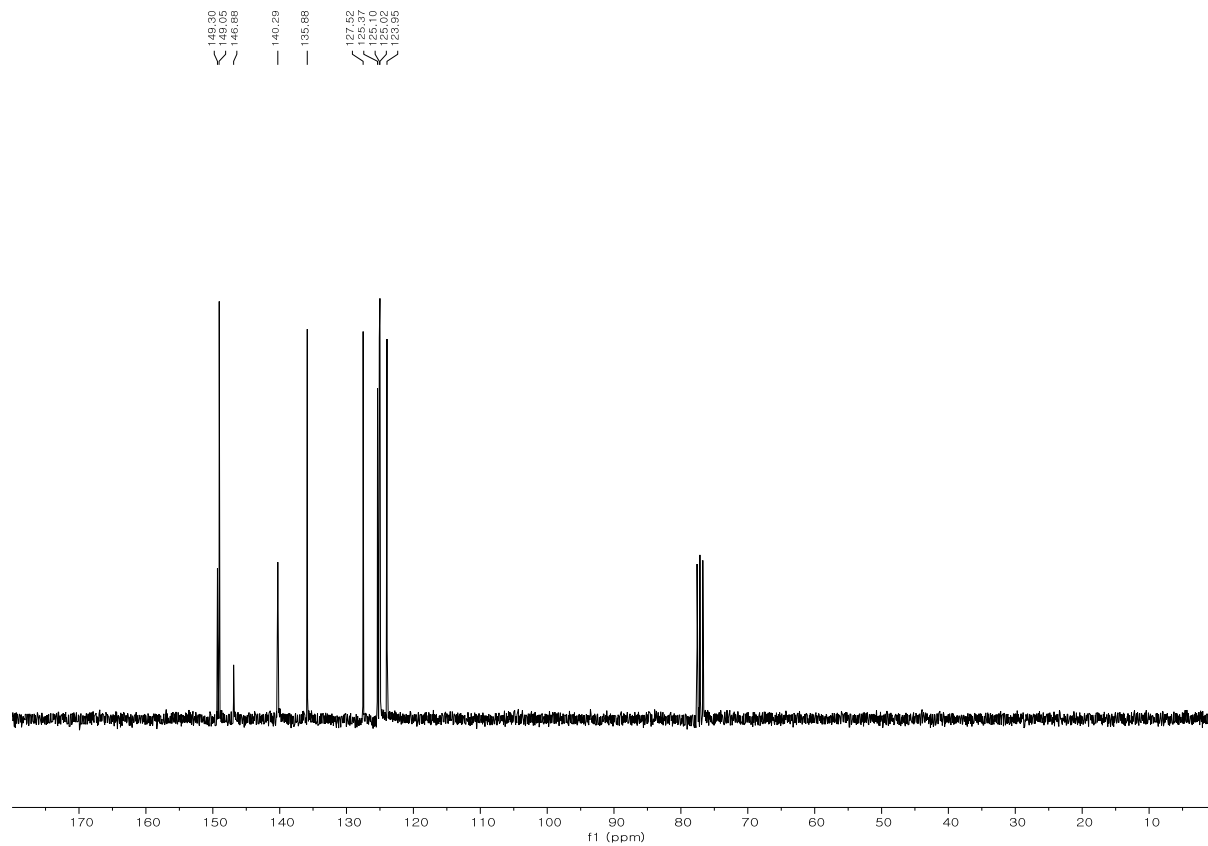

# 6-Isopropyl-2,2'-bipyridine (6a)

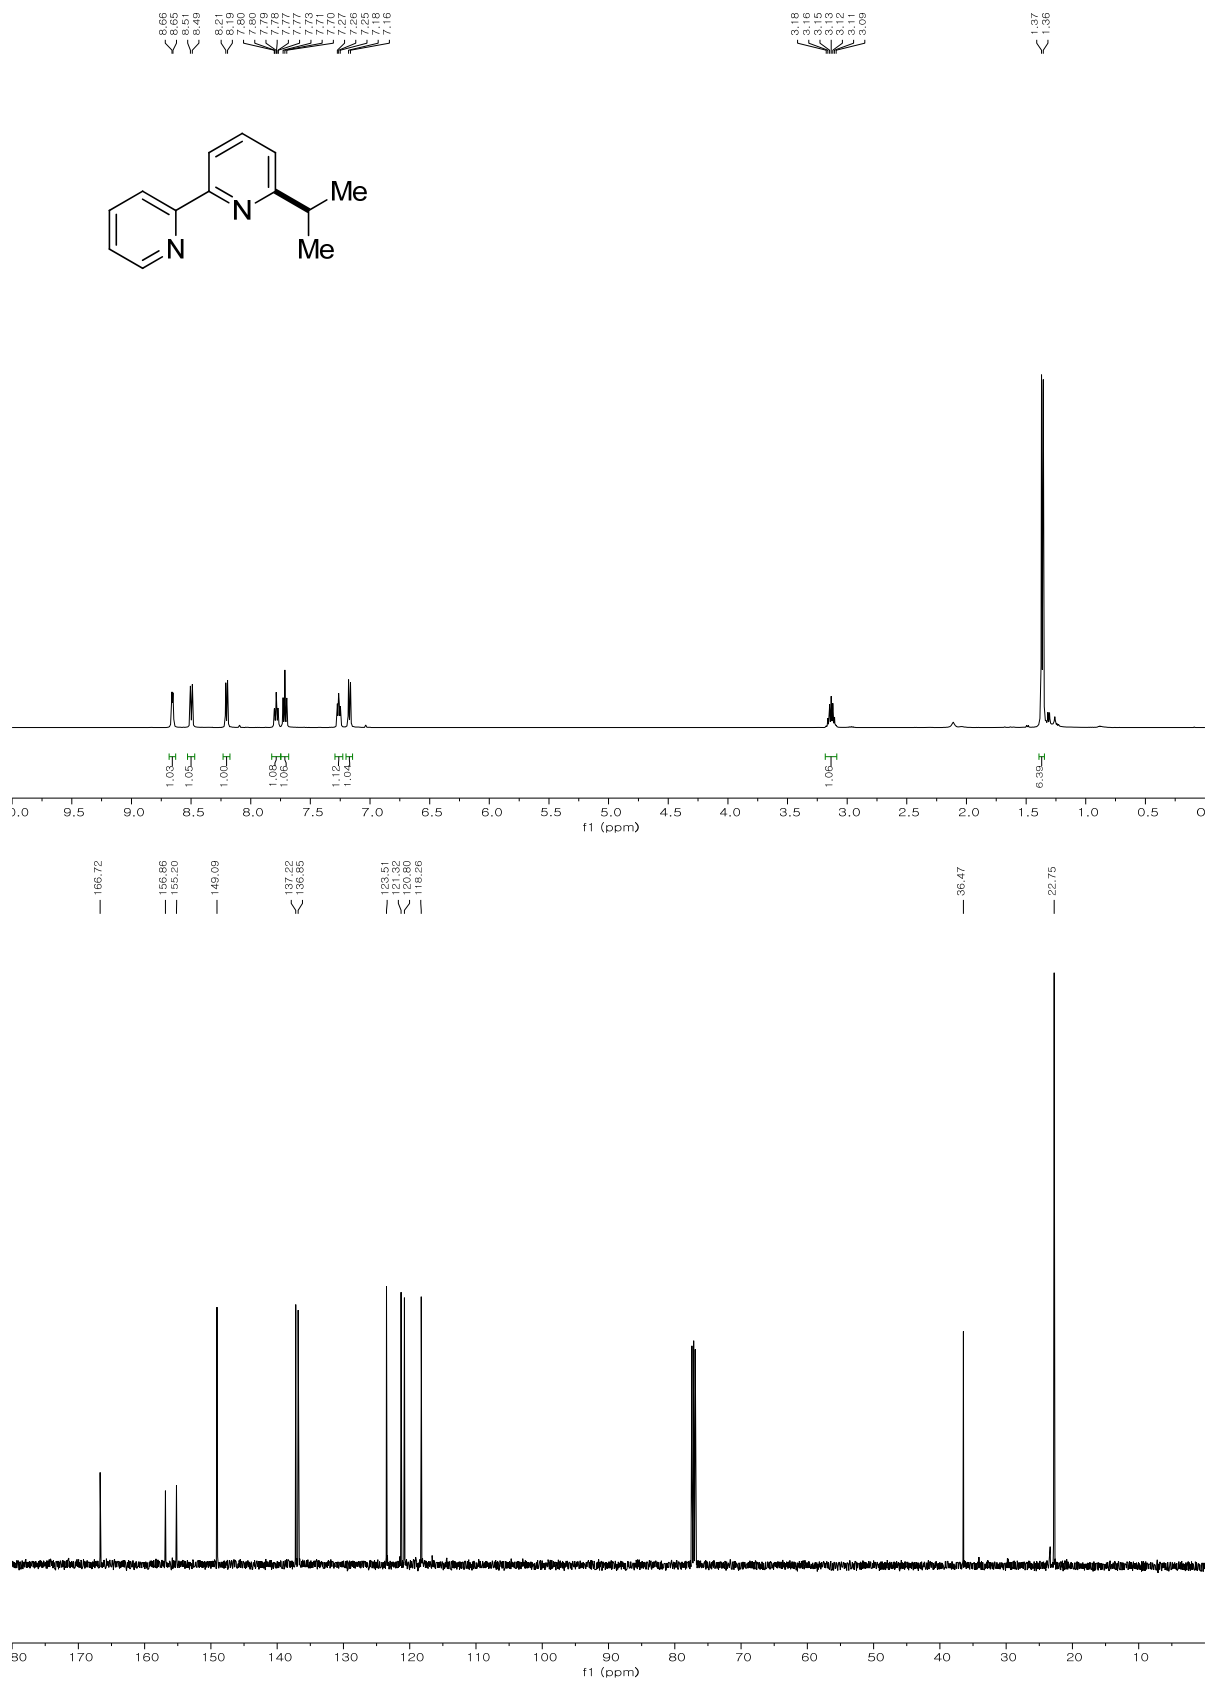



# 6-Isopropyl-4,4'-dimethyl-2,2'-bipyridine (6b)

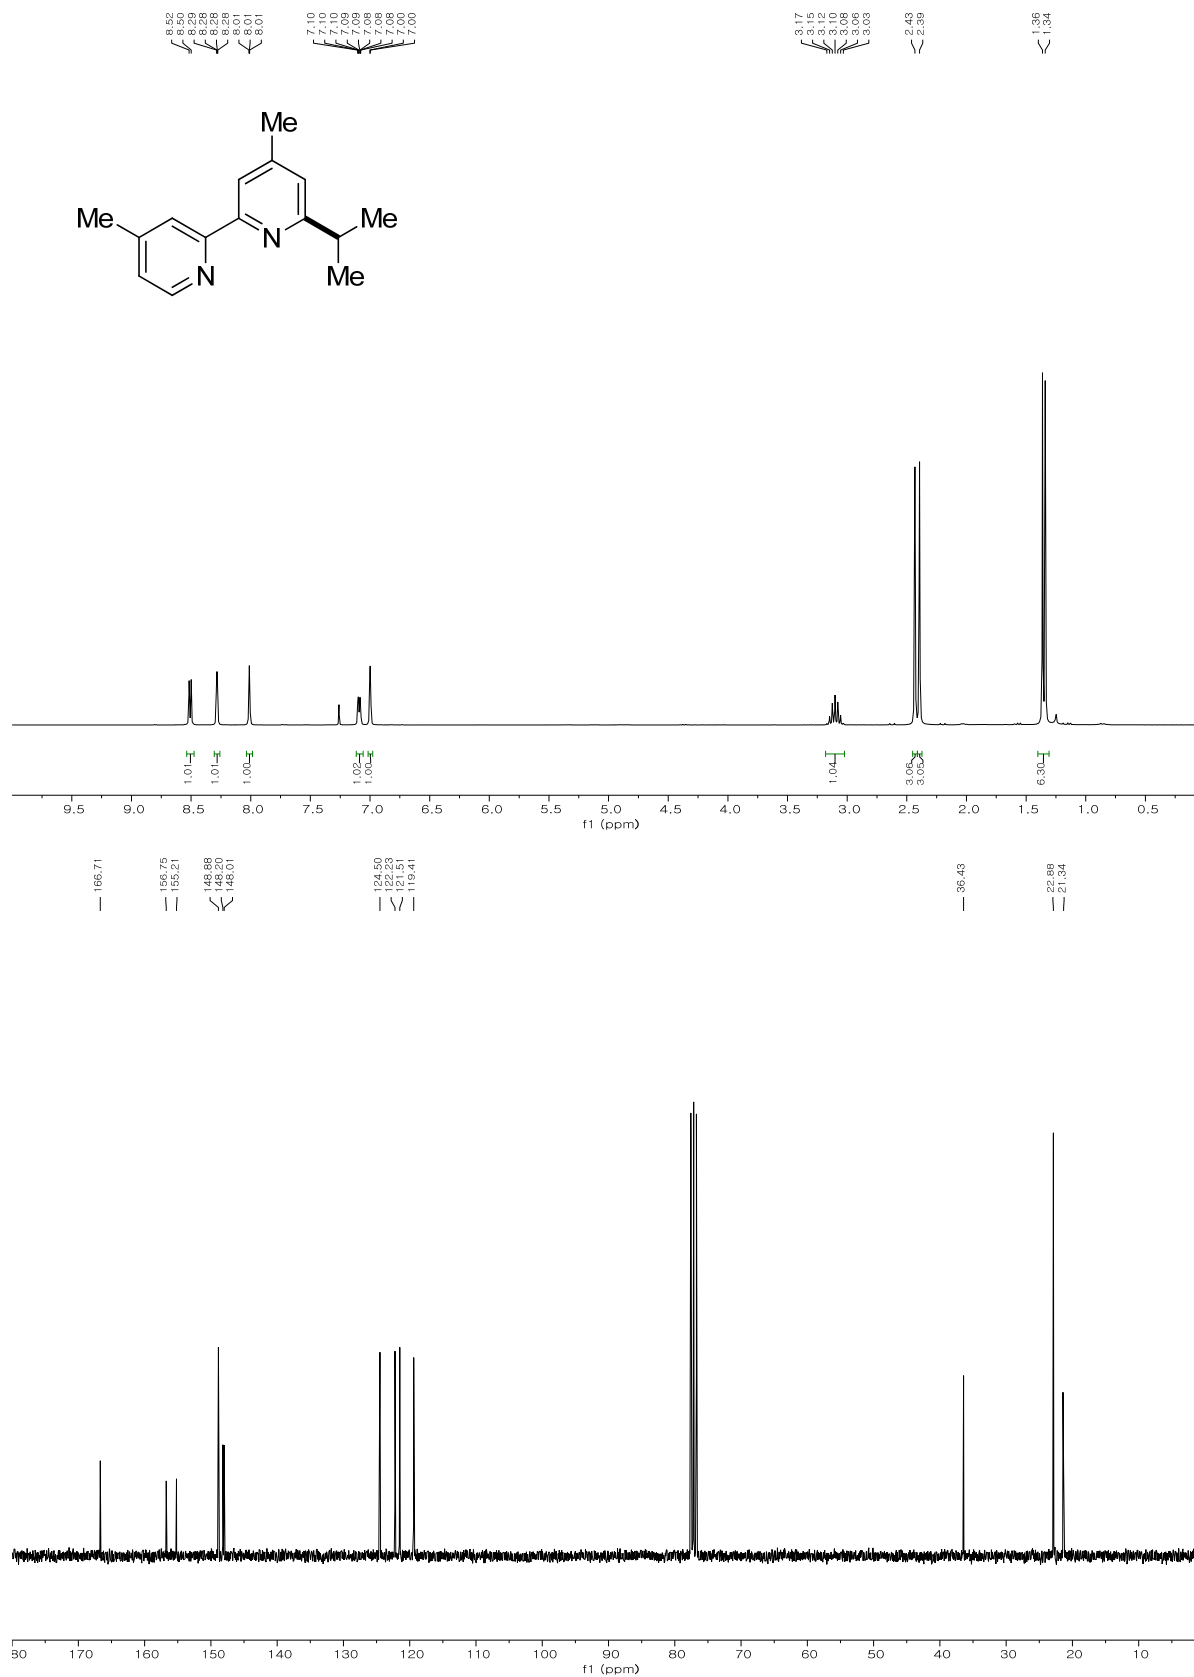

# 4,4'-Di-*tert*-butyl-6-isopropyl-2,2'-bipyridine (6c)

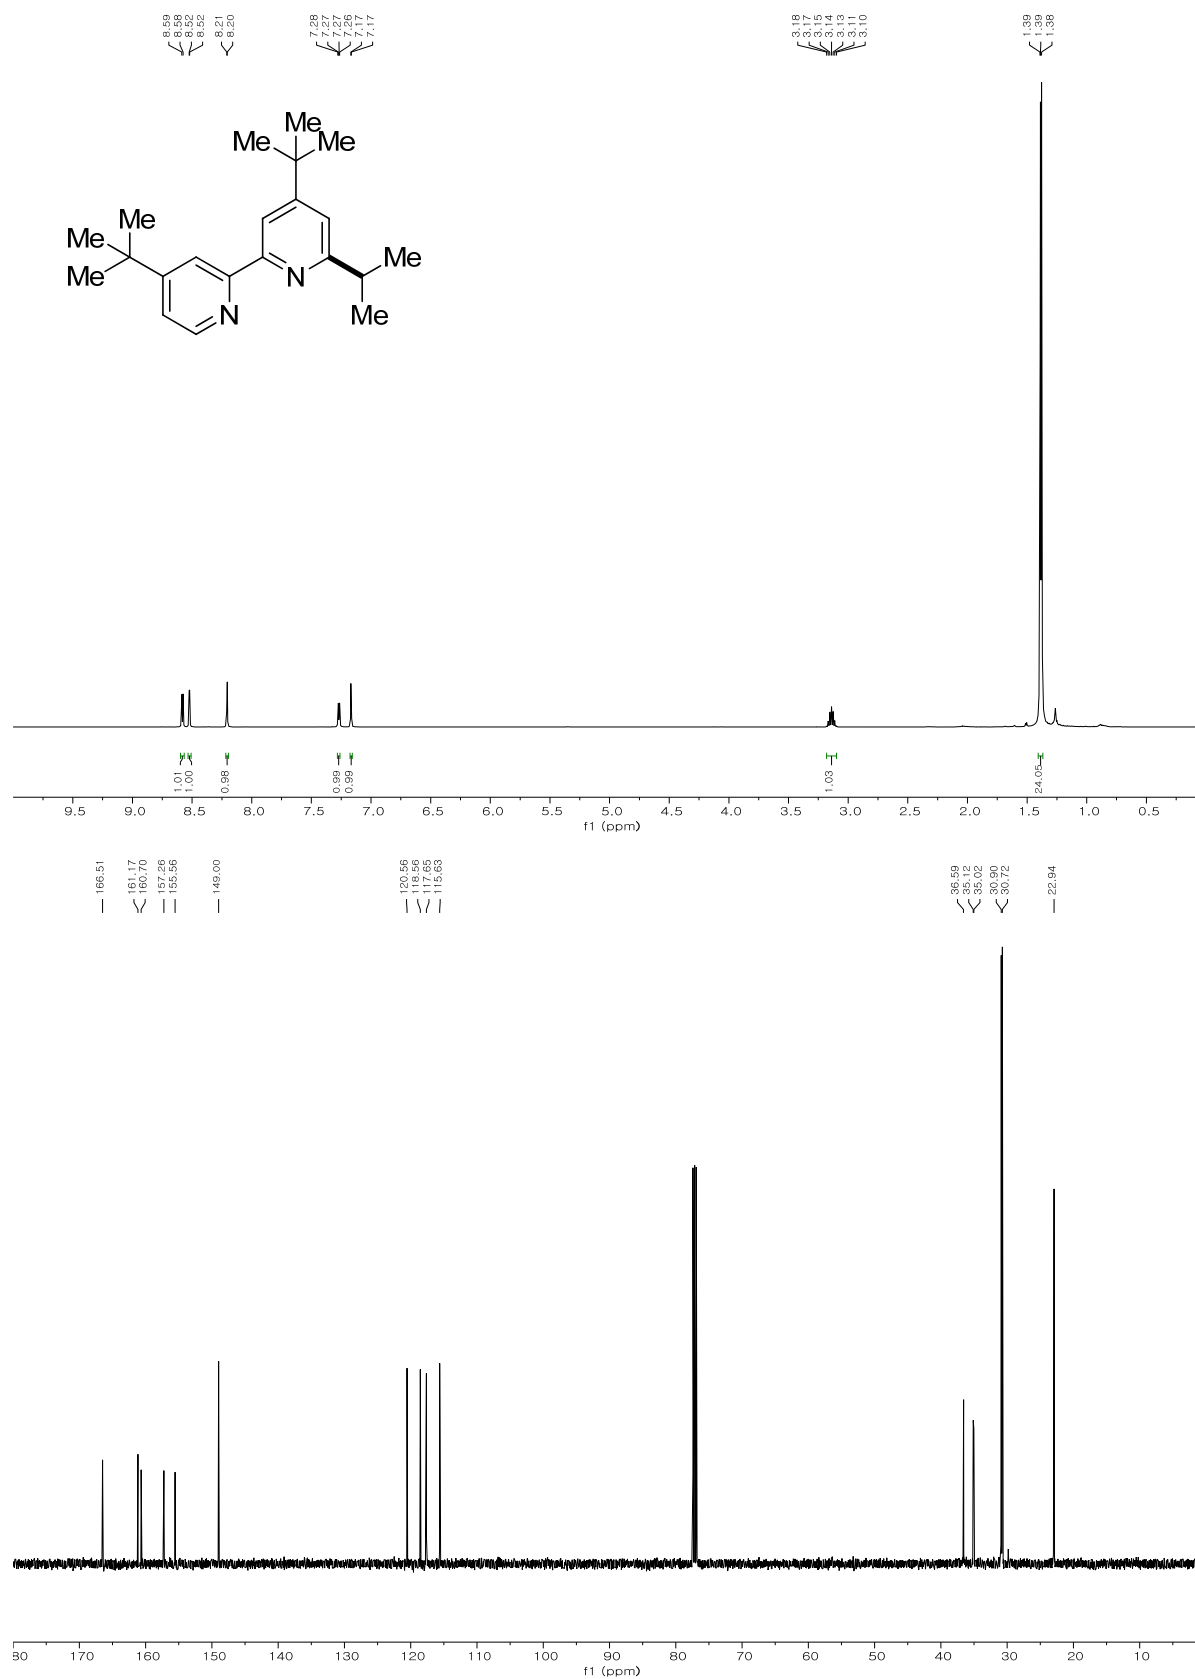

# 6-Isopropyl-2,2':6',2''-terpyridine (6d)

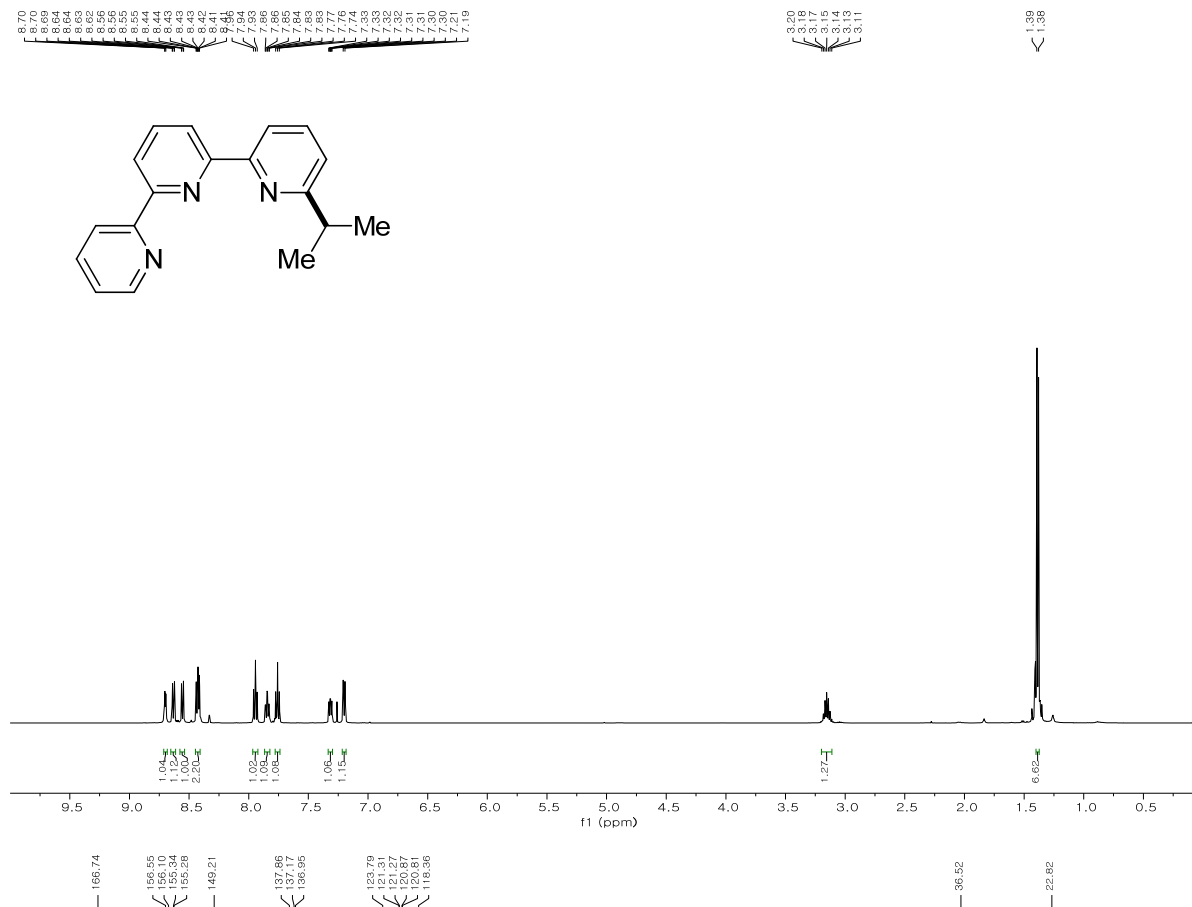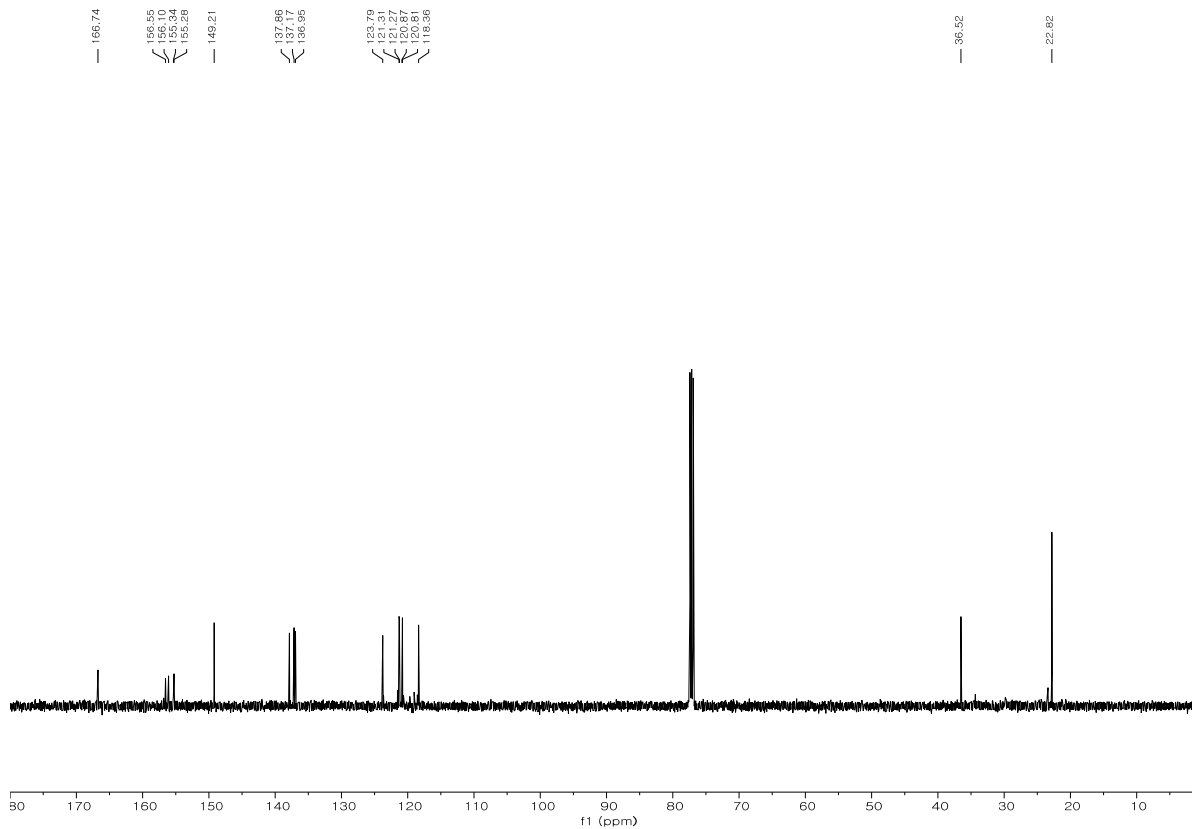

# 6-(*sec*-Butyl)-2,2'-bipyridine (6e)

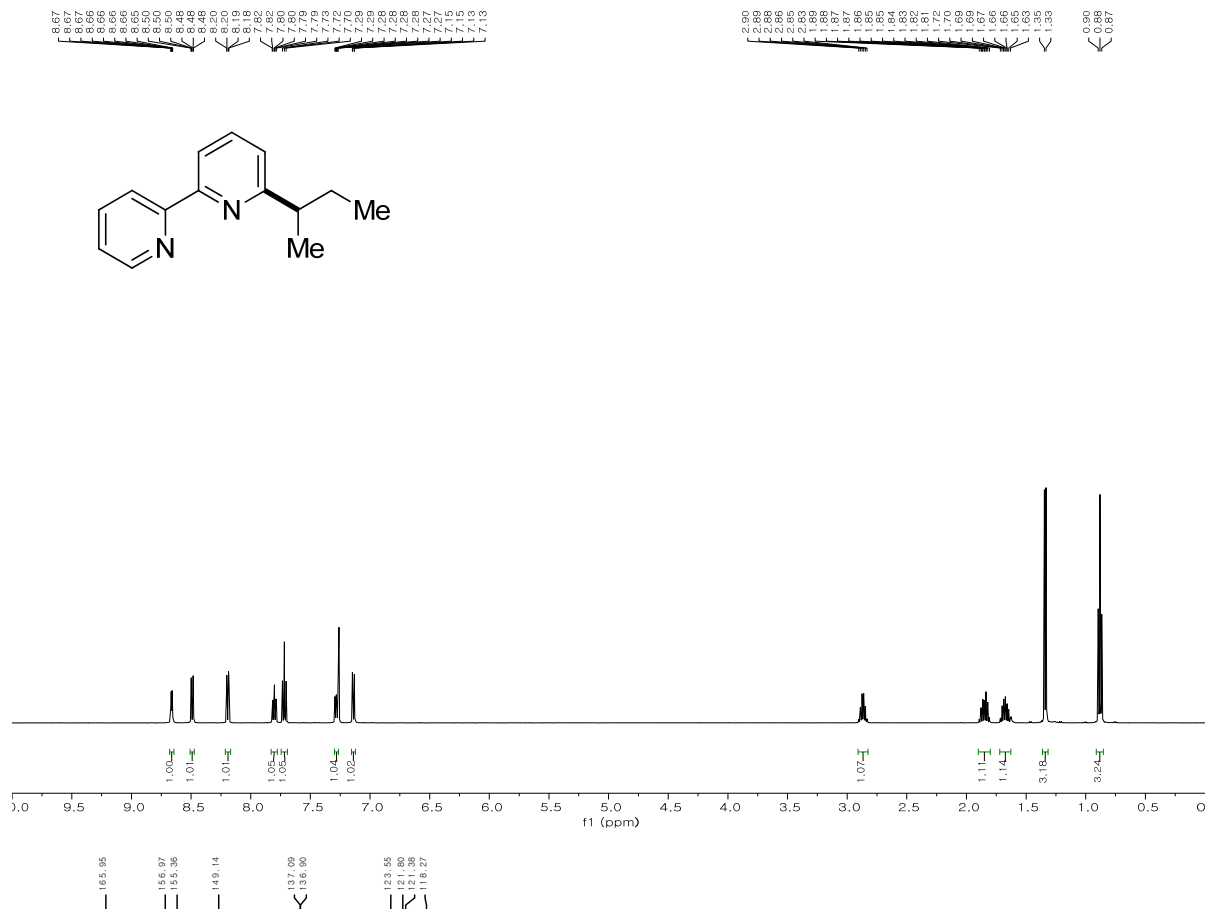

# 6-(Dec-1-en-4-yl)-2,2'-bipyridine (6f)

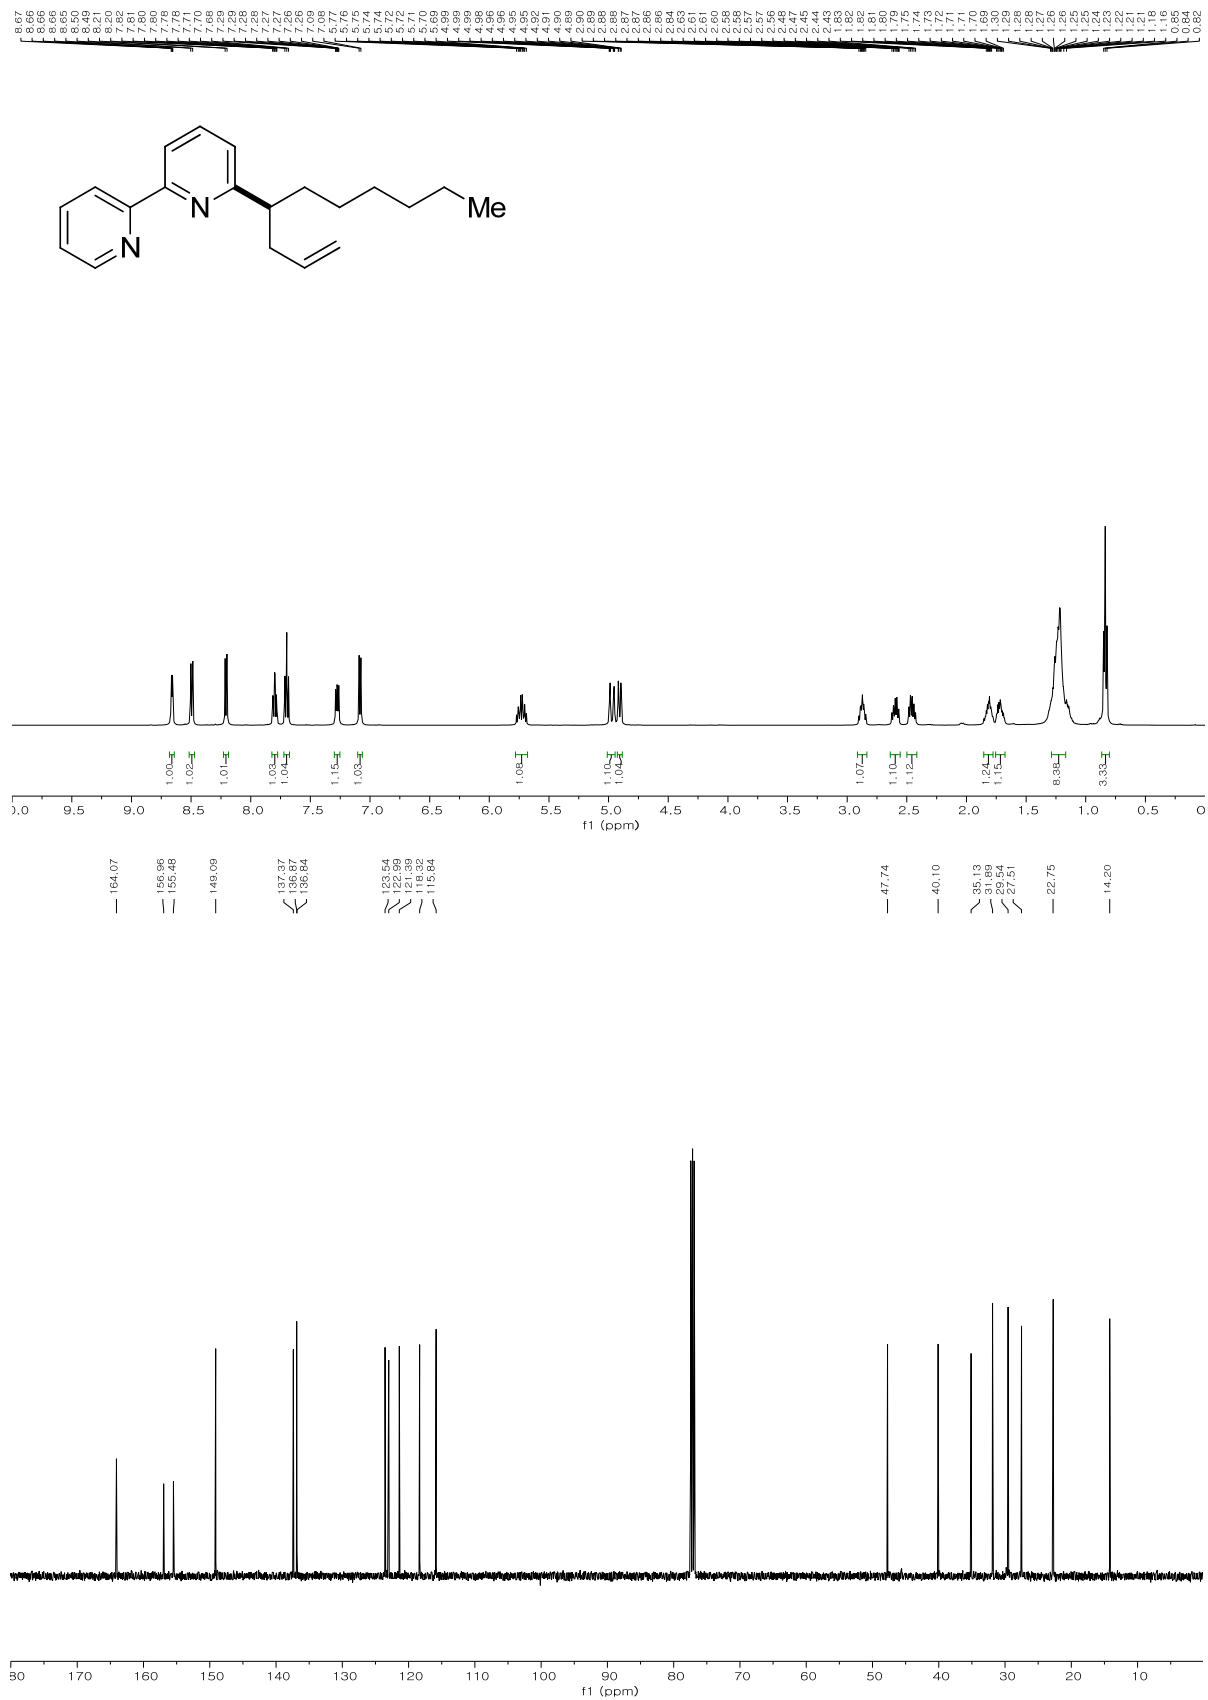

Cc1ccc(cc1)[C@H](CCCCCc2ccncc2)c3ccccn3

<sup>1</sup>H NMR spectrum (CDCl<sub>3</sub>) showing peaks from 0.8 to 7.9 ppm. Integration values are provided below the baseline.

<sup>13</sup>C NMR spectrum (CDCl<sub>3</sub>) showing peaks from 14.2 to 163.6 ppm.

# 6-(1-Phenylpropan-2-yl)-2,2':6',2''-terpyridine (6h)

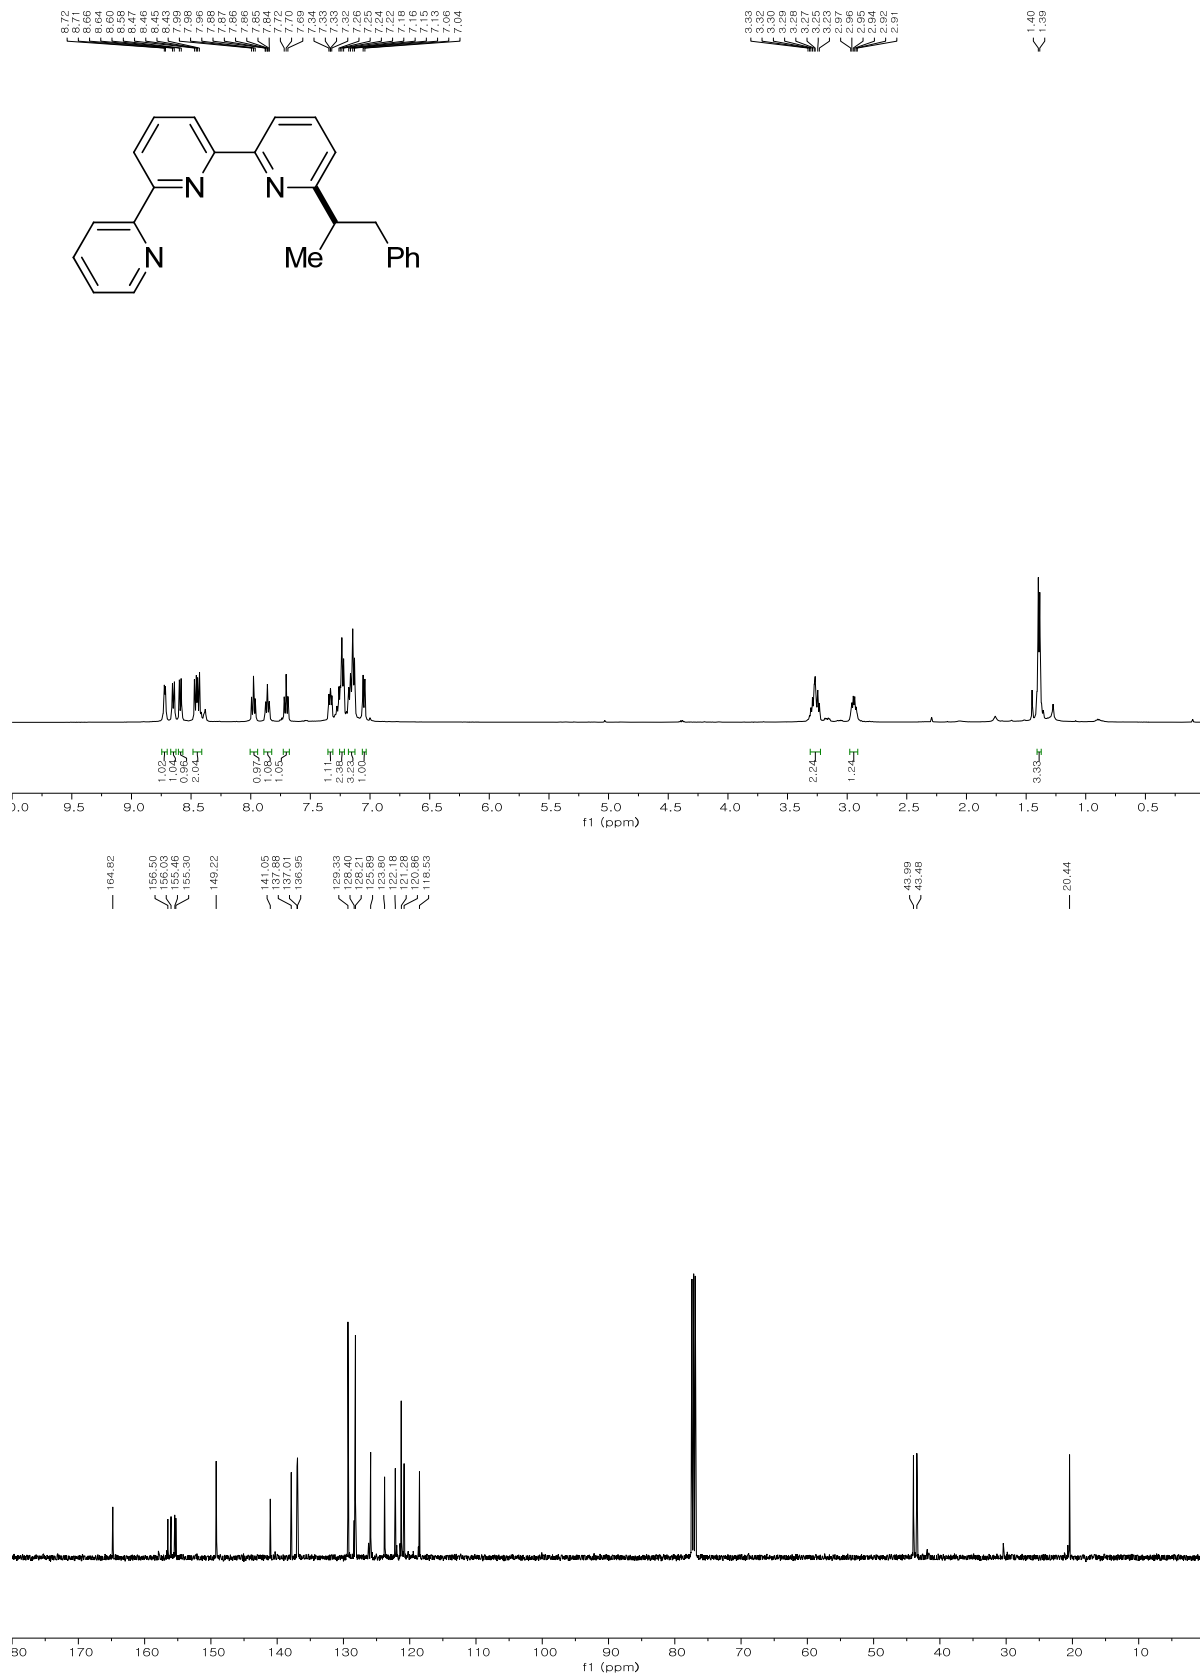

# 6-(Pent-4-en-2-yl)-2,2':6',2''-terpyridine (6i)

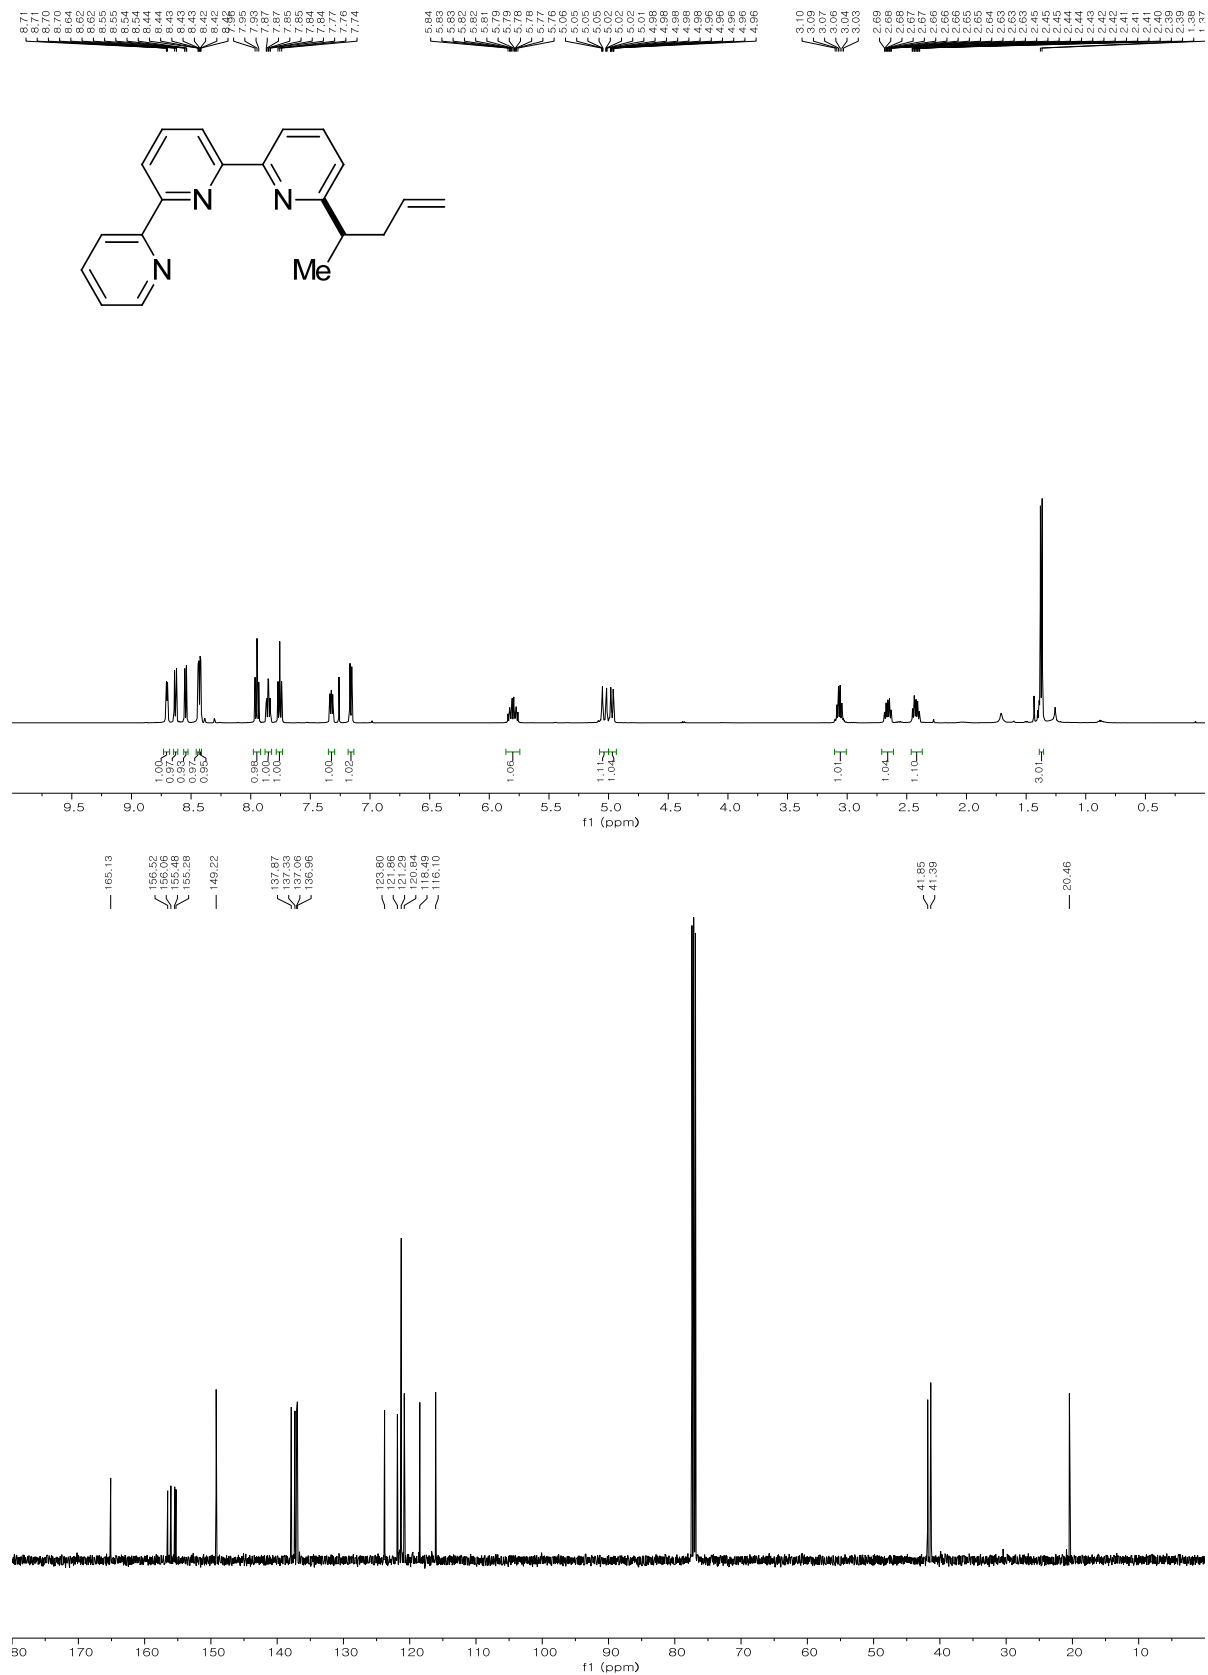



# 6-(1-Phenylpropan-2-yl)-2,2'-bipyridine (6j)

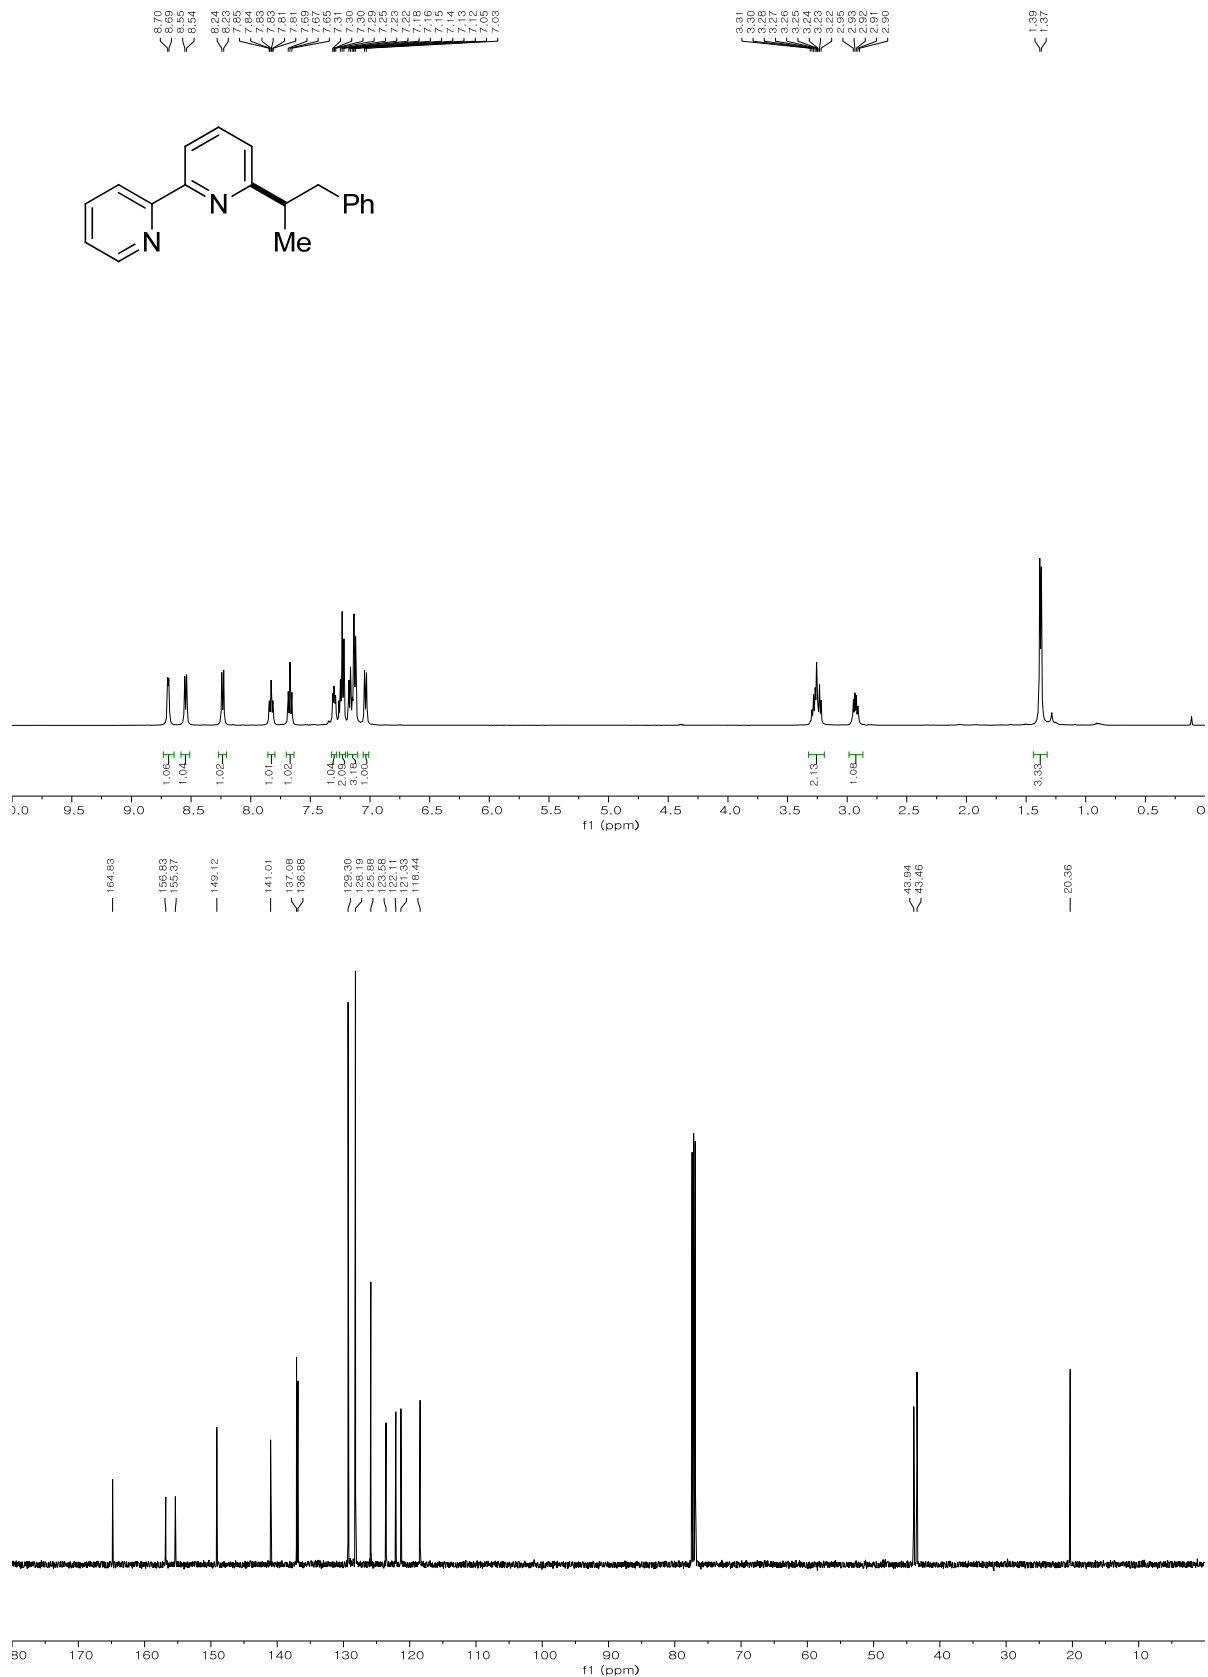

# 6'-(*sec*-Butyl)-2,2'-bipyridine-*N*-oxide (7a)

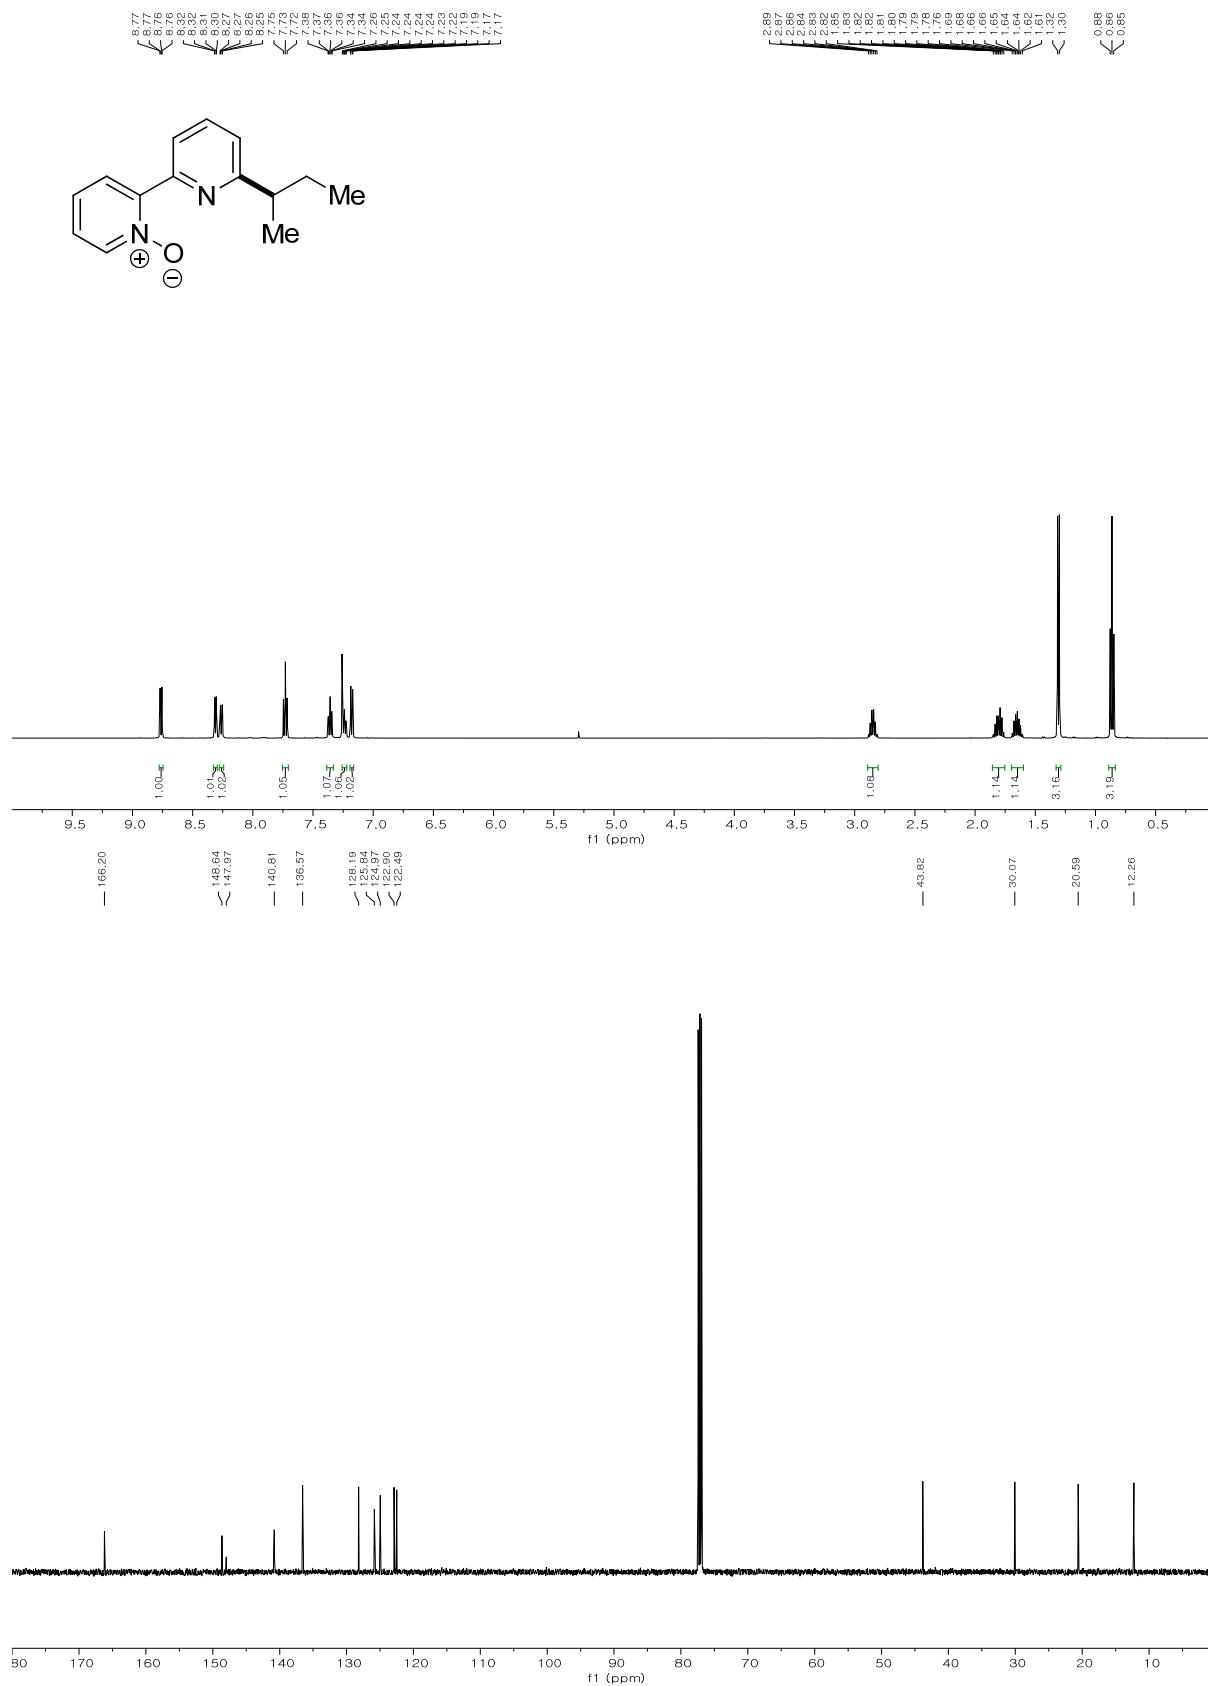

# 6'-(1-Phenylpropan-2-yl)-2,2'-bipyridine-*N*-oxide (7b)

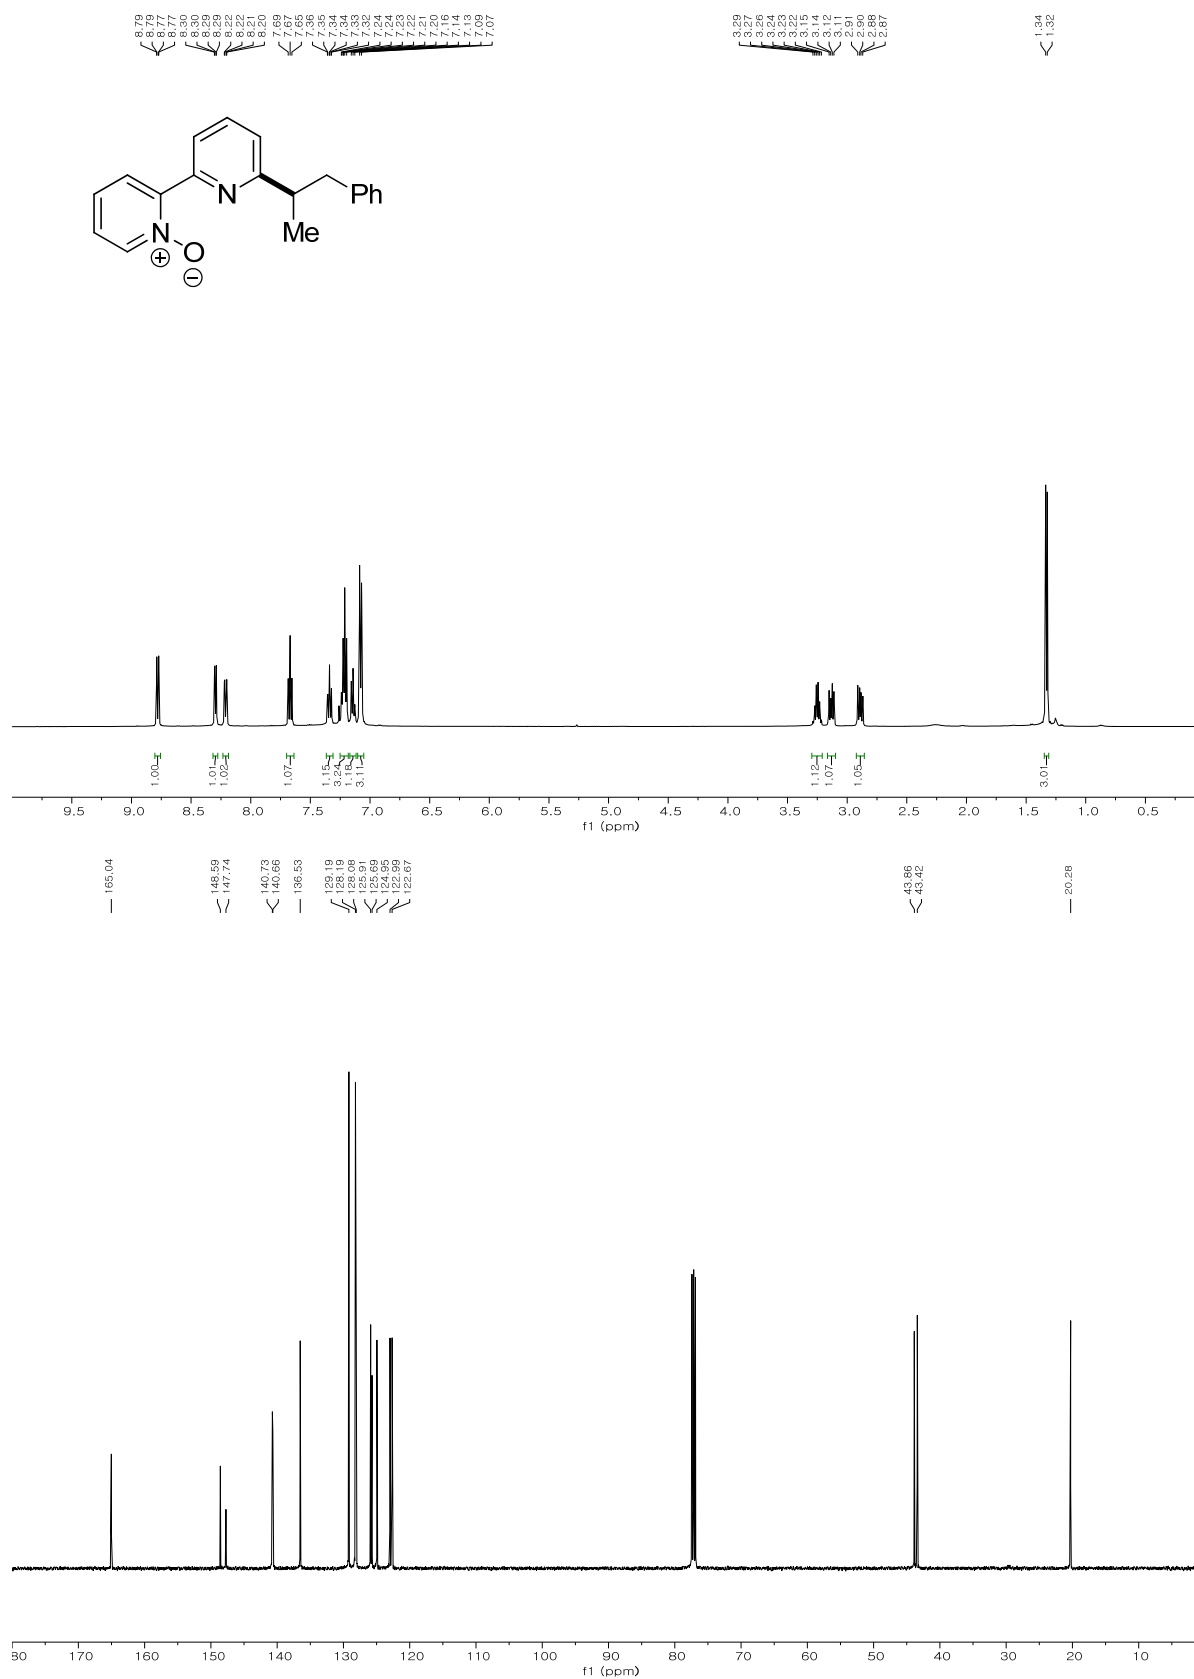

# 6-(*sec*-Butyl)-6'-methyl-2,2'-bipyridine (8a)

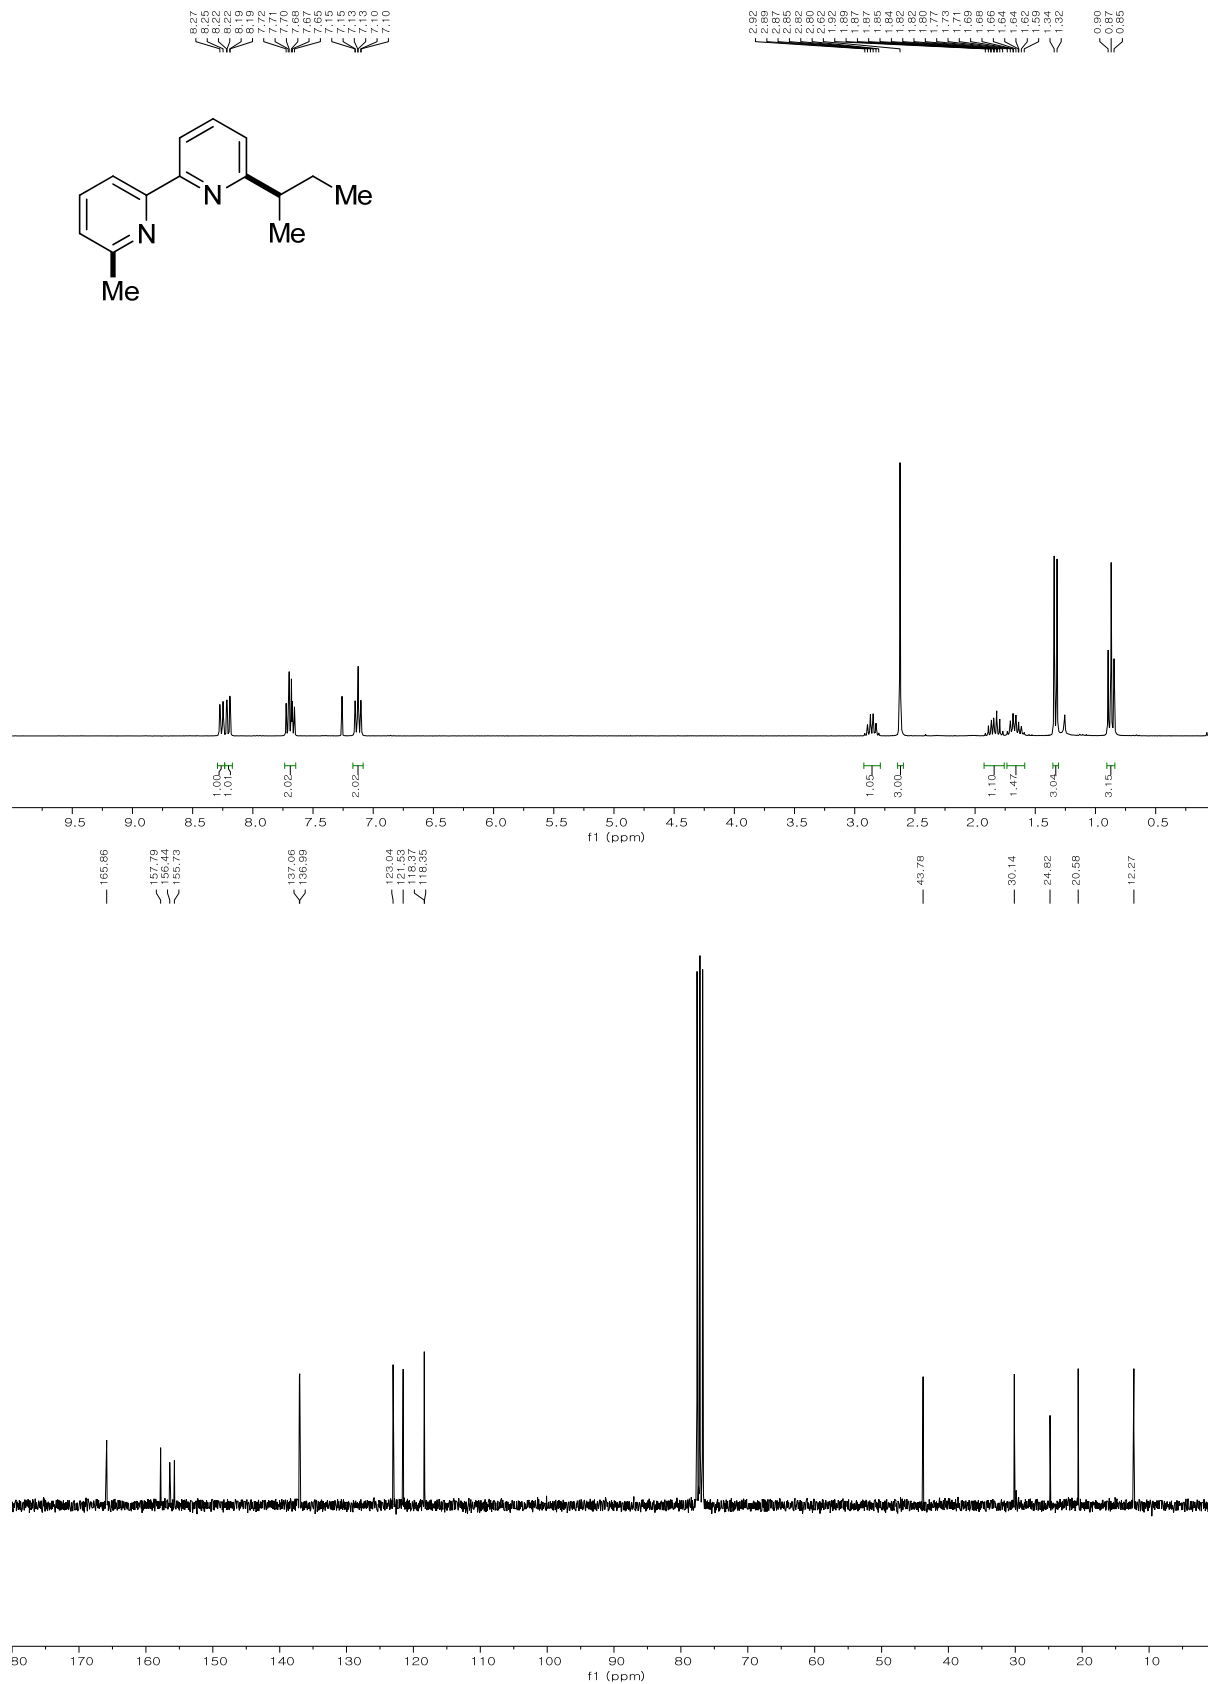

# 6-Methyl-6'-(1-phenylpropan-2-yl)-2,2'-bipyridine (8b)

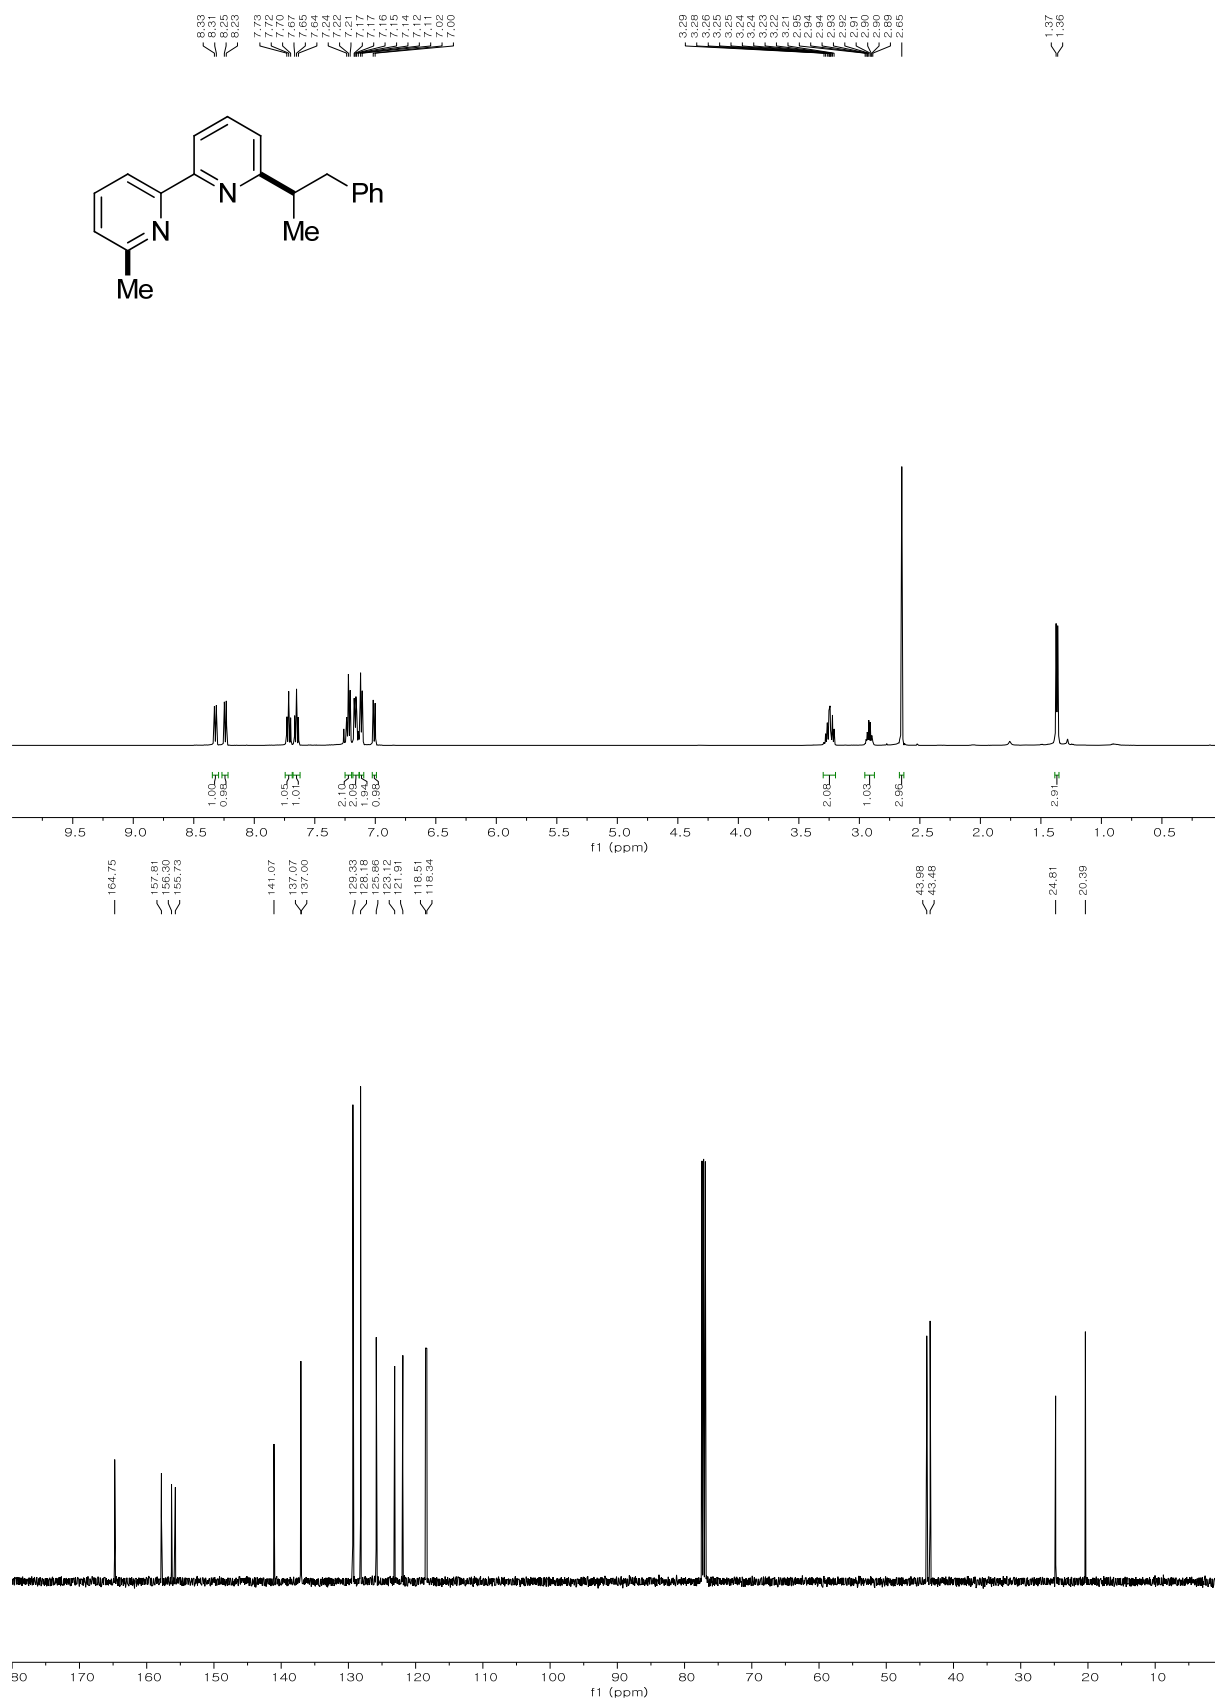

Supplement: c7cc03731g1.pdf [file c7cc03731g1.pdf]
